# Supplementary material for: Magnesium Cyanide or Isocyanide?
Source: PubMed Central journal article supplement (PMC6856803; doi:10.1002/anie.201909511), 2019-09-18
Supplement: ANIE-58-15736-s001.pdf [file ANIE-58-15736-s001.pdf]

## Supporting Information

### **Magnesium Cyanide or Isocyanide?**

*Gerd Ballmann, Holger Elsen, and Sjoerd Harder\**

anie\_201909511\_sm\_miscellaneous\_information.pdf

---

# SUPPORTING INFORMATION

---

## Contents

|                                                                                                      |     |
|------------------------------------------------------------------------------------------------------|-----|
| 1) General experimental procedures and complex syntheses                                             | S 2 |
| 2) Crystal structure data                                                                            | S 5 |
| 3) Selected $^1\text{H}$ , $^{13}\text{C}$ , DEPT-135, ATP, COSY, HSQC,<br>HMBC and DOSY NMR spectra | S12 |
| 4) Selected infrared spectra                                                                         | S28 |
| 5) Theoretical calculations                                                                          | S35 |
| 6) References                                                                                        | S56 |

# 1) General experimental procedures and complex syntheses

## General experimental procedures

All experiments were carried out in dry glassware under N<sub>2</sub> using standard Schlenk techniques and freshly dried and degassed solvents (all solvents were dried over a column except for THF, which was dried over Na and redistilled). Starting materials and research chemicals were obtained from commercial suppliers where appropriate and used without further purification. (<sup>Mes</sup>DPM-H)<sup>[1]</sup>, Mg(N(SiMe<sub>3</sub>)<sub>2</sub>)<sub>2</sub><sup>[2]</sup> and TMS-<sup>13</sup>CN<sup>[3]</sup> were synthesized following literature known procedures. NMR spectra were measured on Bruker Avance III HD 400 MHz and Bruker Avance III HD 600 MHz spectrometers. Chemical shifts ( $\delta$ ) are given in ppm (parts per million) values, coupling constants ( $J$ ) in Hz (Hertz). For describing signal multiplicities common abbreviations were used: s (singlet), d (doublet), t (triplet), q (quartet), m (multiplet) and br (broad). Spectra were referenced due to solvent residual signal. IR vibrational spectra were recorded on a Shimadzu, IRAffinity-1 as KBr pellets at room temperature or neat on a Bruker Alpha II Platinum ATR. Elemental analysis was performed with a Hekatech Eurovector EA3000 analyzer. All crystal structures have been measured on a SuperNova (Agilent) diffractometer with dual Cu and Mo microfocus sources and an Atlas S2 detector. Crystallographic data have been deposited with the Cambridge Crystallographic Data Centre as supplementary publication numbers: 1942970 (**1**), 1942971 (**2**), 1942972 (**3**) and 1942973 (**4**).

## Complex syntheses

### Synthesis of (<sup>Mes</sup>DPM)MgN(SiMe<sub>3</sub>)<sub>2</sub> (**1**)

In a 50 mL Schlenk flask <sup>Mes</sup>DPM-H (580 mg, 1.16 mmol) was suspended in toluene (12 mL). Mg(N(TMS)<sub>2</sub>)<sub>2</sub> (421 mg, 1.22 mmol, 1.05 equiv.) was added to the stirred yellow reaction mixture resulting in a color change to red/orange. The reaction mixture was heated to 80 °C for 12h and subsequently filtered, which gave a dark orange solution. The solvent was removed in vacuo yielding a light orange powder. Recrystallization from a concentrated toluene solution at -20 °C yielded orange crystalline blocks. Yield: 744 mg (1.09 mmol; 94 %).

<sup>1</sup>H NMR (400 MHz, C<sub>6</sub>D<sub>6</sub>, 25 °C):  $\delta$  = 6.84 (s, 4H, Mes-aryl-CH), 6.83 (s, 2H, Mes-aryl-CH), 6.82 (s, 2H, Mes-aryl-CH), 6.74 (d,  $J$  = 3.9 Hz, 2H, pyrrole-CH), 6.13 (d,  $J$  = 3.9 Hz, 2H, pyrrole-CH), 2.26 (s, 6H, Mes-CH<sub>3</sub>), 2.25 (s, 12H, Mes-CH<sub>3</sub>), 2.24 (s, 3H, Mes-CH<sub>3</sub>), 2.18 (s, 6H, Mes-CH<sub>3</sub>), -0.05 (s, 18H, N(Si(CH<sub>3</sub>)<sub>3</sub>)<sub>2</sub>) ppm.

<sup>13</sup>C{<sup>1</sup>H} NMR (101 MHz, C<sub>6</sub>D<sub>6</sub>, 25 °C):  $\delta$  = 162.7 (C<sub>arom</sub>), 147.0 (C<sub>arom</sub>), 141.5 (C<sub>arom</sub>), 138.6 (C<sub>arom</sub>), 137.4 (C<sub>arom</sub>), 136.9 (C<sub>arom</sub>), 136.8 (C<sub>arom</sub>), 136.5 (C<sub>arom</sub>), 133.8 (C<sub>arom</sub>), 133.5 (C<sub>arom</sub>), 129.0 (C<sub>arom</sub>), 128.2 (C<sub>arom</sub>), 119.9 (C<sub>arom</sub>), 21.2 (C<sub>aliph</sub>), 21.2 (C<sub>aliph</sub>), 21.0 (C<sub>aliph</sub>), 20.0 (C<sub>aliph</sub>), 4.5 (C<sub>aliph</sub>).

Elemental analysis: Calculated values for C<sub>42</sub>H<sub>55</sub>N<sub>3</sub>Si<sub>2</sub>Mg (681.38 g/mol): C 73.92, H 8.12, N 6.12; Found: C 73.94, H 8.08, N 6.07.

## Synthesis of (<sup>Mes</sup>DPM)MgN(SiMe<sub>3</sub>)<sub>2</sub>(NC-TMS) (2)

In a 50 mL Schlenk flask (<sup>Mes</sup>DPM)MgN(SiMe<sub>3</sub>)<sub>2</sub> (1) (346 mg, 0.508 mmol) was dissolved in benzene (20 mL) to give a dark orange solution. A solution of trimethylsilyl-cyanide (64 μL, 50 mg, 0.508 mmol, 1.0 equiv.) in benzene (2 mL) was added slowly to the stirred reaction mixture at -70 °C. The reaction mixture was kept under inert atmosphere and was warmed to room temperature overnight. The solvent was removed in vacuo yielding a reddish powder. Recrystallization from a concentrated toluene solution at -20 °C yielded orange crystalline blocks. Yield: 191 mg (0.245 mmol; 48 %).

<sup>1</sup>H NMR (600 MHz, C<sub>6</sub>D<sub>6</sub>, 25 °C): δ = 6.85 (s, 2H, Mes-aryl-CH), 6.81 (d, *J* = 3.9 Hz, 2H, pyrrole-CH), 6.79 (s, 4H, Mes-aryl-CH), 6.16 (d, *J* = 3.9 Hz, 2H, pyrrole-CH), 2.35 (s, 6H, Mes-CH<sub>3</sub>), 2.32 (s, 12H, Mes-CH<sub>3</sub>), 2.25 (s, 3H, Mes-CH<sub>3</sub>), 2.20 (s, 6H, Mes-CH<sub>3</sub>), -0.09 (s, 18H, N(Si(CH<sub>3</sub>)<sub>3</sub>)<sub>2</sub>), -0.12 (s, 9H, N≡C-Si(CH<sub>3</sub>)<sub>3</sub>) ppm.

<sup>13</sup>C{<sup>1</sup>H} NMR (151 MHz, C<sub>6</sub>D<sub>6</sub>, 25 °C): δ = 162.2 (C<sub>arom</sub>), 147.0 (C<sub>arom</sub>), 141.7 (C<sub>arom</sub>), 137.7 (C<sub>arom</sub>), 137.5 (C<sub>arom</sub>), 137.4 (C<sub>arom</sub>), 137.3 (C<sub>arom</sub>), 137.2 (C<sub>arom</sub>), 137.0 (C<sub>arom</sub>), 134.7 (C<sub>arom</sub>), 133.3 (C<sub>arom</sub>), 128.5 (C<sub>arom</sub>), 128.4 (C<sub>arom</sub>), 119.2 (C<sub>arom</sub>), 21.5 (C<sub>aliph</sub>), 21.2 (C<sub>aliph</sub>), 21.2 (C<sub>aliph</sub>), 20.4 (C<sub>aliph</sub>), -6.4 (C<sub>aliph</sub>), -2.9 (C<sub>aliph</sub>) ppm.

Elemental analysis: Calculated values for C<sub>46</sub>H<sub>64</sub>N<sub>4</sub>Si<sub>3</sub>Mg (780.61 g/mol): C 70.69, H 8.25, N 7.17; Found: C 69.64, H 8.17, N 6.64.

## Synthesis of (<sup>Mes</sup>DPM)Mg(*n*Bu) (3)

A 50 mL Schlenk flask was charged with <sup>Mes</sup>DPM-H (1.16 g, 2.33 mmol) suspended in toluene (25 mL) and cooled to -70 °C. Dibutylmagnesium (1M in *n*-heptane, 2.44 mL, 2.44 mmol, 1.05 equiv.) was added slowly, resulting in a color change from yellow to red. The reaction mixture was kept under inert atmosphere and was warmed to room temperature overnight. Removal of solvent in vacuo gave the crude product as red solid in quantitative yield. Recrystallization in a concentrated toluene solution at -20 °C yielded a first crop of crystalline red blocks. Second crops of crystals contained higher levels of impurities. Yield: 311 mg (0.538 mmol; 23 %).

<sup>1</sup>H NMR (600 MHz, C<sub>6</sub>D<sub>6</sub>, 25 °C): δ = 6.87 (s, 2H, Mes-aryl-CH), 6.82 (s, 4H, Mes-aryl-CH), 6.77 (d, *J* = 3.9 Hz, 2H, pyrrole-CH), 6.19 (d, *J* = 3.9 Hz, 2H, pyrrole-CH), 2.30 (s, 6H, Mes-CH<sub>3</sub>), 2.26 (s, 3H, Mes-CH<sub>3</sub>), 2.17 (s, 12H, Mes-CH<sub>3</sub>), 2.15 (s, 6H, Mes-CH<sub>3</sub>), 1.04 - 0.10 (m, 2H, Mg-γ-CH<sub>2</sub>), 0.89 - 0.94 (m, 5H, Mg-β-CH<sub>2</sub> and Mg-δ-CH<sub>3</sub>), -0.75 - -0.78 (m, 2H, Mg-α-CH<sub>2</sub>) ppm.

<sup>13</sup>C{<sup>1</sup>H} NMR (151 MHz, C<sub>6</sub>D<sub>6</sub>, 25 °C): δ = 162.5 (C<sub>arom</sub>), 146.9 (C<sub>arom</sub>), 141.1 (C<sub>arom</sub>), 138.2 (C<sub>arom</sub>), 137.4 (C<sub>arom</sub>), 136.8 (C<sub>arom</sub>), 136.6 (C<sub>arom</sub>), 136.6 (C<sub>arom</sub>), 133.1 (C<sub>arom</sub>), 133.1 (C<sub>arom</sub>), 133.0 (C<sub>arom</sub>), 128.9 (C<sub>arom</sub>), 119.8 (C<sub>arom</sub>), 32.0 (C<sub>aliph</sub>), 30.7 (C<sub>aliph</sub>), 21.2 (C<sub>aliph</sub>), 21.2 (C<sub>aliph</sub>), 20.8 (C<sub>aliph</sub>), 20.2 (C<sub>aliph</sub>), 14.4 (C<sub>aliph</sub>), 6.1 (C<sub>aliph</sub>) ppm.

Elemental analysis: Calculated values for  $C_{40}H_{46}N_2Mg$  (578.35 g/mol): C 82.96, H 8.01, N 4.84; Found: C 81.81, H 7.86, N 4.57.

### Synthesis of (<sup>Mes</sup>DPM)MgNC(THF)<sub>2</sub> (**4**)

A 50 mL Schlenk flask was charged with (<sup>Mes</sup>DPM)Mg(*n*Bu) (**3**) (520 mg, 0.899 mmol) and dissolved in toluene (12 mL). After cooling the red solution to -70 °C a solution of precooled trimethylsilyl-cyanide (118 μL, 0.943 mmol, 1.05 equiv.) in toluene (10 mL) was added slowly, resulting in a color change from red to orange. The reaction mixture was kept under inert atmosphere and was warmed to room temperature overnight. Removal of solvent in vacuo and trituration with *n*-hexane (3x10 mL) gave the crude product as orange solid. Recrystallization in a mixture of toluene/THF (10:1) at -20 °C yielded crops of crystalline orange blocks. Yield: 346 mg (0.500 mmol; 56 %).

<sup>1</sup>H NMR (600 MHz, C<sub>6</sub>D<sub>6</sub>, 25 °C): δ = 6.86 (s, 2H, Mes-aryl-CH), 6.80 (s, 4H, Mes-aryl-CH), 6.69 (d, *J* = 3.9 Hz, 2H, pyrrole-CH), 6.13 (d, *J* = 3.9 Hz, 2H, pyrrole-CH), 3.54 – 3.56 (m, 4H, THF<sup>complex</sup>-CH<sub>2</sub>), 3.52 (br, THF<sup>free</sup>-CH<sub>2</sub>), 2.27 (s, 6H, Mes-CH<sub>3</sub>), 2.25 (s, 3H, Mes-CH<sub>3</sub>), 2.15 (s, 12H, Mes-CH<sub>3</sub>), 2.13 (s, 6H, Mes-CH<sub>3</sub>), 1.44 – 1.47 (m, 4H, THF-CH<sub>2</sub>), 1.41 (br, THF<sup>free</sup>-CH<sub>2</sub>) ppm.

<sup>13</sup>C{<sup>1</sup>H} NMR (151 MHz, C<sub>6</sub>D<sub>6</sub>, 25 °C): δ = 162.1 (C<sub>arom</sub>), 146.9 (C<sub>arom</sub>), 141.2 (C<sub>arom</sub>), 137.8 (C<sub>arom</sub>), 137.3 (C<sub>arom</sub>), 137.3 (C<sub>arom</sub>), 137.2 (C<sub>arom</sub>), 136.9 (C<sub>arom</sub>), 136.9 (C<sub>arom</sub>), 133.6 (C<sub>arom</sub>), 132.9 (C<sub>arom</sub>), 129.0 (C<sub>arom</sub>), 119.3 (C<sub>arom</sub>), 67.8 (C<sub>THF</sub><sup>free</sup>), 67.0 (C<sub>THF</sub><sup>complex</sup>), 25.9 (C<sub>THF</sub><sup>free</sup>), 24.8 (C<sub>THF</sub><sup>complex</sup>), 21.2 (C<sub>aliph</sub>), 21.2 (C<sub>aliph</sub>), 20.9 (C<sub>aliph</sub>), 20.2 (C<sub>aliph</sub>) ppm.

Signal for Mg–N≡C was not observed. See corresponding <sup>13</sup>C-labeled NMR spectra.

<sup>1</sup>H NMR (600 MHz, THF-*d*<sub>8</sub>, 25 °C): δ = 6.94 (s, 2H, Mes-aryl-CH), 6.79 (s, 4H, Mes-aryl-CH), 6.47 (d, *J* = 4.0 Hz, 2H, pyrrole-CH), 6.12 (d, *J* = 3.9 Hz, 2H, pyrrole-CH), 3.60 – 3.56 (m, 4H, THF<sup>complex</sup>-CH<sub>2</sub>), 3.54 (br, THF<sup>free</sup>-CH<sub>2</sub>), 2.33 (s, 3H, Mes-CH<sub>3</sub>), 2.20 (s, 6H, Mes-CH<sub>3</sub>), 2.14 (s, 6H, Mes-CH<sub>3</sub>), 2.02 (s, 12H, Mes-CH<sub>3</sub>), 1.79 – 1.71 (m, 4H, THF-CH<sub>2</sub>), 1.69 (br, THF<sup>free</sup>-CH<sub>2</sub>) ppm.

<sup>13</sup>C{<sup>1</sup>H} NMR (151 MHz, C<sub>6</sub>D<sub>6</sub>, 25 °C): δ = 162.5 (C<sub>arom</sub>), 147.2 (C<sub>arom</sub>), 141.7 (C<sub>arom</sub>), 138.4 (C<sub>arom</sub>), 138.2 (C<sub>arom</sub>), 138.0 (C<sub>arom</sub>), 137.6 (C<sub>arom</sub>), 137.5 (C<sub>arom</sub>), 134.4 (C<sub>arom</sub>), 132.8 (C<sub>arom</sub>), 128.9 (C<sub>arom</sub>), 128.6 (C<sub>arom</sub>), 120.0 (C<sub>arom</sub>), 68.4 (C<sub>THF</sub><sup>complex</sup>), 67.6 (C<sub>THF</sub><sup>free</sup>), 26.6 (C<sub>THF</sub><sup>complex</sup>), 25.5 (C<sub>THF</sub><sup>free</sup>), 21.5 (C<sub>aliph</sub>), 21.4 (C<sub>aliph</sub>), 21.0 (C<sub>aliph</sub>), 20.4 ppm.

Signal for Mg–N≡C was not observed. See corresponding <sup>13</sup>C-labeled NMR spectra.

Elemental analysis: Calculated values for  $C_{45}H_{53}N_3O_2Mg$  (691.40 g/mol): C 78.08, H 7.72, N 6.07; Found: C 78.41, H 7.25, N 6.65.

## 2) Crystal structure data

### Crystal structure of $(^{\text{Mes}}\text{DPM})\text{MgN}(\text{SiMe}_3)_2$ (**1**) – hasj181114a

An orange crystal of  $(^{\text{Mes}}\text{DPM})\text{MgN}(\text{SiMe}_3)_2$  (**1**) was embedded in inert perfluoropolyalkylether (viscosity 1800 cSt; ABCR GmbH) and mounted using a Hampton Research CryoLoop. The crystal was then flash cooled to 100 K in a nitrogen gas stream and kept at this temperature during the experiment. The crystal structure was measured on a SuperNova diffractometer with Atlas S2 detector using a  $\text{CuK}\alpha$  microfocus source. The measured data was processed with the CrysAlisPro software package.<sup>[4]</sup> Using Olex2<sup>[5]</sup>, the structure was solved with the ShelXT<sup>[6]</sup> structure solution program using Intrinsic Phasing and refined with the ShelXL<sup>[7]</sup> refinement package using Least Squares minimization. All hydrogen atoms were placed in ideal positions and refined as riding atoms with relative isotropic displacement parameters.

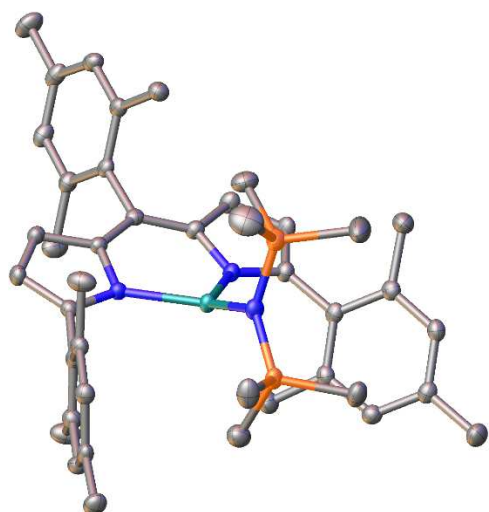

**Figure S1.** ORTEP plot of  $(^{\text{Mes}}\text{DPM})\text{MgN}(\text{SiMe}_3)_2$  (**1**) (50% probability).

| <b>Table S1.</b> Crystal data and structure refinement for ( <sup>Mes</sup> DPM)MgN(SiMe <sub>3</sub> ) <sub>2</sub> ( <b>1</b> ) |                                                                  |
|-----------------------------------------------------------------------------------------------------------------------------------|------------------------------------------------------------------|
| Identification code                                                                                                               | hasj181114a                                                      |
| Empirical formula                                                                                                                 | C <sub>42</sub> H <sub>55</sub> MgN <sub>3</sub> Si <sub>2</sub> |
| Formula weight                                                                                                                    | 682.38                                                           |
| Temperature/K                                                                                                                     | 100                                                              |
| Crystal system                                                                                                                    | Monoclinic                                                       |
| Space group                                                                                                                       | P2 <sub>1</sub> /c                                               |
| a/Å                                                                                                                               | 12.77500(10)                                                     |
| b/Å                                                                                                                               | 16.06740(10)                                                     |
| c/Å                                                                                                                               | 19.8664(2)                                                       |
| α/°                                                                                                                               | 90                                                               |
| β/°                                                                                                                               | 96.2640(10)                                                      |
| γ/°                                                                                                                               | 90                                                               |
| Volume/Å <sup>3</sup>                                                                                                             | 4053.45(6)                                                       |
| Z                                                                                                                                 | 4                                                                |
| ρ <sub>calc</sub> /cm <sup>3</sup>                                                                                                | 1.118                                                            |
| μ/mm <sup>-1</sup>                                                                                                                | 1.172                                                            |
| F(000)                                                                                                                            | 1472.0                                                           |
| Crystal size/mm <sup>3</sup>                                                                                                      | 0.565 × 0.346 × 0.187                                            |
| Crystal color                                                                                                                     | Orange                                                           |
| Radiation                                                                                                                         | CuKα (λ = 1.54184)                                               |
| 2θ range for data collection/°                                                                                                    | 6.96 to 136.198                                                  |
| Index ranges                                                                                                                      | -14 ≤ h ≤ 15, -18 ≤ k ≤ 19, -20 ≤ l ≤ 23                         |
| Reflections collected                                                                                                             | 22222                                                            |
| Independent reflections                                                                                                           | 7402 [R <sub>int</sub> = 0.0242, R <sub>sigma</sub> = 0.0236]    |
| Data/restraints/parameters                                                                                                        | 7402/0/448                                                       |
| Goodness-of-fit on F <sup>2</sup>                                                                                                 | 1.023                                                            |
| Final R indexes [I >= 2σ (I)]                                                                                                     | R <sub>1</sub> = 0.0365, wR <sub>2</sub> = 0.0952                |
| Final R indexes [all data]                                                                                                        | R <sub>1</sub> = 0.0389, wR <sub>2</sub> = 0.0975                |
| Largest diff. peak/hole / e Å <sup>-3</sup>                                                                                       | 0.29/-0.41                                                       |

### Crystal structure of $(^{\text{Mes}}\text{DPM})\text{Mg}(\text{N}(\text{SiMe}_3)_2)(\text{NC-TMS})$ (**2**) – hasj181016b

An orange crystal of  $(^{\text{Mes}}\text{DPM})\text{Mg}(\text{N}(\text{SiMe}_3)_2)(\text{NC-TMS})$  (**2**) was embedded in inert perfluoropolyalkylether (viscosity 1800 cSt; ABCR GmbH) and mounted using a Hampton Research CryoLoop. The crystal was then flash cooled to 100 K in a nitrogen gas stream and kept at this temperature during the experiment. The crystal structure was measured on a SuperNova diffractometer with Atlas S2 detector using a  $\text{CuK}\alpha$  microfocus source. The measured data was processed with the CrysAlisPro software package.<sup>[4]</sup> Using Olex2<sup>[5]</sup>, the structure was solved with the ShelXT<sup>[6]</sup> structure solution program using Intrinsic Phasing and refined with the ShelXL<sup>[7]</sup> refinement package using Least Squares minimization. All hydrogen atoms were placed in ideal positions and refined as riding atoms with relative isotropic displacement parameters.

The trimethylsilyl-group of the coordinated trimethylsilylcyanide was found to be disordered over two positions. The relative contributions of the two orientations were refined to ~ 0.50/0.50.

A satisfactory disorder model for the solvent could not be found, and therefore the OLEX2 Solvent Mask routine (similar to PLATON/SQUEEZE) was used to mask out the disordered electron density (49 e<sup>-</sup>).<sup>[8]</sup>

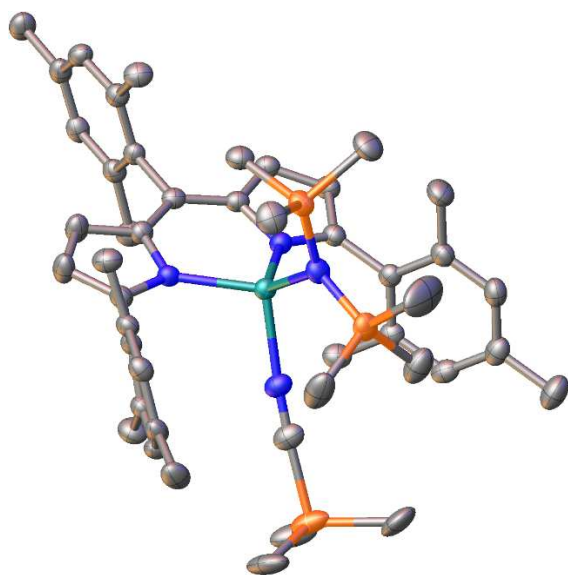

**Figure S2.** ORTEP plot of  $(^{\text{Mes}}\text{DPM})\text{Mg}(\text{N}(\text{SiMe}_3)_2)(\text{NC-TMS})$  (**2**) (50% probability).



| <b>Table S2.</b> Crystal data and structure refinement for ( <sup>Mes</sup> DPM)Mg(N(SiMe <sub>3</sub> ) <sub>2</sub> )(NC-TMS) ( <b>2</b> ) |                                                                  |
|----------------------------------------------------------------------------------------------------------------------------------------------|------------------------------------------------------------------|
| Identification code                                                                                                                          | hasj181016b                                                      |
| Empirical formula                                                                                                                            | C <sub>46</sub> H <sub>64</sub> MgN <sub>4</sub> Si <sub>3</sub> |
| Formula weight                                                                                                                               | 781.59                                                           |
| Temperature/K                                                                                                                                | 100                                                              |
| Crystal system                                                                                                                               | Triclinic                                                        |
| Space group                                                                                                                                  | P-1                                                              |
| a/Å                                                                                                                                          | 11.8865(3)                                                       |
| b/Å                                                                                                                                          | 12.0067(3)                                                       |
| c/Å                                                                                                                                          | 18.0349(3)                                                       |
| α/°                                                                                                                                          | 86.850(2)                                                        |
| β/°                                                                                                                                          | 82.801(2)                                                        |
| γ/°                                                                                                                                          | 75.319(2)                                                        |
| Volume/Å <sup>3</sup>                                                                                                                        | 2469.52(10)                                                      |
| Z                                                                                                                                            | 2                                                                |
| ρ <sub>calc</sub> /cm <sup>3</sup>                                                                                                           | 1.051                                                            |
| μ/mm <sup>-1</sup>                                                                                                                           | 1.246                                                            |
| F(000)                                                                                                                                       | 1592.0                                                           |
| Crystal size/mm <sup>3</sup>                                                                                                                 | 0.178 × 0.141 × 0.068                                            |
| Crystal color                                                                                                                                | Orange                                                           |
| Radiation                                                                                                                                    | CuKα (λ = 1.54184)                                               |
| 2θ range for data collection/°                                                                                                               | 7.614 to 136.212                                                 |
| Index ranges                                                                                                                                 | -14 ≤ h ≤ 14, -14 ≤ k ≤ 14, -21 ≤ l ≤ 21                         |
| Reflections collected                                                                                                                        | 50817                                                            |
| Independent reflections                                                                                                                      | 9030 [R <sub>int</sub> = 0.0435, R <sub>sigma</sub> = 0.0262]    |
| Data/restraints/parameters                                                                                                                   | 9030/0/536                                                       |
| Goodness-of-fit on F <sup>2</sup>                                                                                                            | 1.034                                                            |
| Final R indexes [ >=2σ (I)]                                                                                                                  | R <sub>1</sub> = 0.0393, wR <sub>2</sub> = 0.1042                |
| Final R indexes [all data]                                                                                                                   | R <sub>1</sub> = 0.0454, wR <sub>2</sub> = 0.1091                |
| Largest diff. peak/hole / e Å <sup>-3</sup>                                                                                                  | 0.30/-0.35                                                       |

### Crystal structure of (<sup>Mes</sup>DPM)Mg(*n*Bu) (**3**) – hasj180109b

A red crystal of (<sup>Mes</sup>DPM)Mg(*n*Bu) (**3**) was embedded in inert perfluoropolyalkylether (viscosity 1800 cSt; ABCR GmbH) and mounted using a Hampton Research CryoLoop. The crystal was then flash cooled to 100 K in a nitrogen gas stream and kept at this temperature during the experiment. The crystal structure was measured on a SuperNova diffractometer with Atlas S2 detector using a CuKα microfocus source. The measured data was processed with the CrysAlisPro software package.<sup>[4]</sup> Using Olex2<sup>[5]</sup>, the structure was solved with the ShelXT<sup>[6]</sup> structure solution program using Intrinsic Phasing and refined with the ShelXL<sup>[7]</sup> refinement package using Least Squares minimization. All hydrogen atoms were placed in ideal positions and refined as riding atoms with relative isotropic displacement parameters.

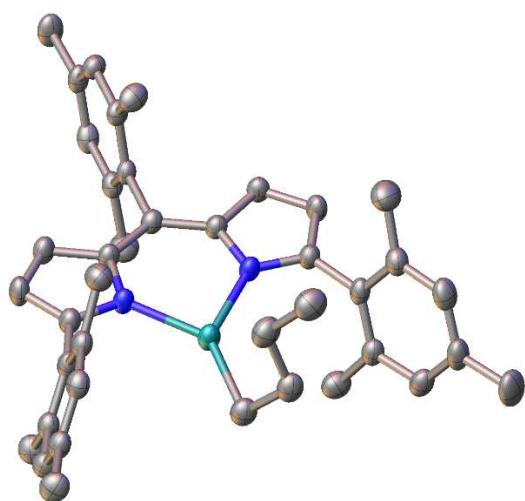

**Figure S3.** ORTEP plot of (<sup>Mes</sup>DPM)Mg(*n*Bu) (**3**) (50% probability).

| <b>Table S3.</b> Crystal data and structure refinement for ( <sup>Mes</sup> DPM)Mg( <i>n</i> Bu) ( <b>3</b> ) |                                                                              |
|---------------------------------------------------------------------------------------------------------------|------------------------------------------------------------------------------|
| Identification code                                                                                           | hasj180509a                                                                  |
| Empirical formula                                                                                             | C <sub>40</sub> H <sub>46</sub> MgN <sub>2</sub>                             |
| Formula weight                                                                                                | 579.10                                                                       |
| Temperature/K                                                                                                 | 100                                                                          |
| Crystal system                                                                                                | Monoclinic                                                                   |
| Space group                                                                                                   | P2 <sub>1</sub> /c                                                           |
| <i>a</i> /Å                                                                                                   | 15.5543(4)                                                                   |
| <i>b</i> /Å                                                                                                   | 14.6575(2)                                                                   |
| <i>c</i> /Å                                                                                                   | 15.5206(4)                                                                   |
| $\alpha$ /°                                                                                                   | 90                                                                           |
| $\beta$ /°                                                                                                    | 107.586(3)                                                                   |
| $\gamma$ /°                                                                                                   | 90                                                                           |
| Volume/Å <sup>3</sup>                                                                                         | 3373.12(14)                                                                  |
| <i>Z</i>                                                                                                      | 4                                                                            |
| $\rho_{\text{calc}}$ /cm <sup>3</sup>                                                                         | 1.140                                                                        |
| $\mu$ /mm <sup>-1</sup>                                                                                       | 0.662                                                                        |
| <i>F</i> (000)                                                                                                | 1248.0                                                                       |
| Crystal size/mm <sup>3</sup>                                                                                  | 0.236 × 0.131 × 0.1                                                          |
| Crystal color                                                                                                 | Red                                                                          |
| Radiation                                                                                                     | CuK $\alpha$ ( $\lambda$ = 1.54184)                                          |
| 2 $\theta$ range for data collection/°                                                                        | 5.96 to 136.226                                                              |
| Index ranges                                                                                                  | -18 ≤ <i>h</i> ≤ 15, -17 ≤ <i>k</i> ≤ 17, -18 ≤ <i>l</i> ≤ 18                |
| Reflections collected                                                                                         | 18667                                                                        |
| Independent reflections                                                                                       | 6141 [ <i>R</i> <sub>int</sub> = 0.0248, <i>R</i> <sub>sigma</sub> = 0.0239] |
| Data/restraints/parameters                                                                                    | 6141/0/398                                                                   |
| Goodness-of-fit on <i>F</i> <sup>2</sup>                                                                      | 1.034                                                                        |
| Final <i>R</i> indexes [ <i>I</i> ≥ 2 $\sigma$ ( <i>I</i> )]                                                  | <i>R</i> <sub>1</sub> = 0.0522, <i>wR</i> <sub>2</sub> = 0.1446              |
| Final <i>R</i> indexes [all data]                                                                             | <i>R</i> <sub>1</sub> = 0.0602, <i>wR</i> <sub>2</sub> = 0.1534              |
| Largest diff. peak/hole / e Å <sup>-3</sup>                                                                   | 1.10/-0.39                                                                   |

### Crystal structure of $(^{\text{Mes}}\text{DPM})\text{MgNC}(\text{THF})_2$ (**4**) – hasj181011a

An orange crystal of  $(^{\text{Mes}}\text{DPM})\text{MgNC}(\text{THF})_2$  (**4**) was embedded in inert perfluoropolyalkylether (viscosity 1800 cSt; ABCR GmbH) and mounted using a Hampton Research CryoLoop. The crystal was then flash cooled to 100 K in a nitrogen gas stream and kept at this temperature during the experiment. The crystal structure was measured on a SuperNova diffractometer with Atlas S2 detector using a  $\text{CuK}\alpha$  microfocus source. The measured data was processed with the CrysAlisPro software package.<sup>[4]</sup> Using Olex2<sup>[5]</sup>, the structure was solved with the ShelXT<sup>[6]</sup> structure solution program using Intrinsic Phasing and refined with the ShelXL<sup>[7]</sup> refinement package using Least Squares minimization. All hydrogen atoms were placed in ideal positions and refined as riding atoms with relative isotropic displacement parameters.

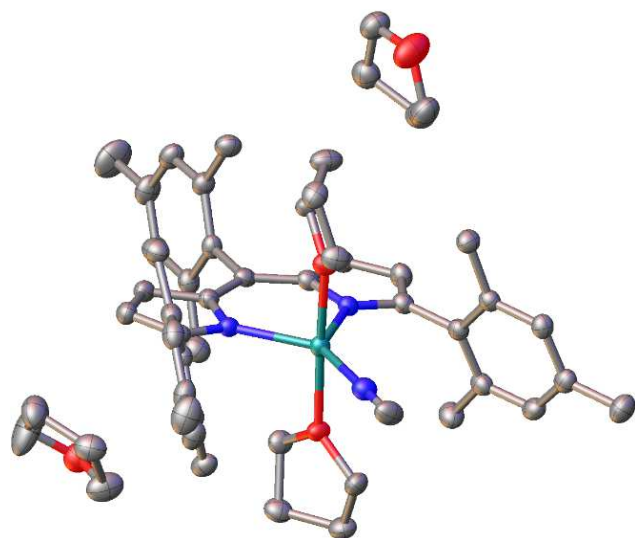

**Figure S4.** ORTEP plot of  $(^{\text{Mes}}\text{DPM})\text{MgNC}(\text{THF})_2$  (**4**) (50% probability).

| <b>Table S4.</b> Crystal data and structure refinement for ( <sup>Me</sup> sDPM)MgNC(THF) <sub>2</sub> ( <b>4</b> ) |                                                                 |
|---------------------------------------------------------------------------------------------------------------------|-----------------------------------------------------------------|
| Identification code                                                                                                 | hasj181011a                                                     |
| Empirical formula                                                                                                   | C <sub>53</sub> H <sub>69</sub> MgN <sub>3</sub> O <sub>4</sub> |
| Formula weight                                                                                                      | 836.42                                                          |
| Temperature/K                                                                                                       | 100                                                             |
| Crystal system                                                                                                      | Monoclinic                                                      |
| Space group                                                                                                         | P2 <sub>1</sub> /n                                              |
| a/Å                                                                                                                 | 11.3228(5)                                                      |
| b/Å                                                                                                                 | 23.1796(9)                                                      |
| c/Å                                                                                                                 | 18.7284(8)                                                      |
| α/°                                                                                                                 | 90                                                              |
| β/°                                                                                                                 | 105.867(5)                                                      |
| γ/°                                                                                                                 | 90                                                              |
| Volume/Å <sup>3</sup>                                                                                               | 4728.1(4)                                                       |
| Z                                                                                                                   | 4                                                               |
| ρ <sub>calc</sub> /g/cm <sup>3</sup>                                                                                | 1.175                                                           |
| μ/mm <sup>-1</sup>                                                                                                  | 0.690                                                           |
| F(000)                                                                                                              | 1808.0                                                          |
| Crystal size/mm <sup>3</sup>                                                                                        | 0.45 × 0.271 × 0.259                                            |
| Crystal color                                                                                                       | Orange                                                          |
| Radiation                                                                                                           | CuKα (λ = 1.54184)                                              |
| 2θ range for data collection/°                                                                                      | 6.214 to 136.216                                                |
| Index ranges                                                                                                        | -13 ≤ h ≤ 9, -27 ≤ k ≤ 26, -22 ≤ l ≤ 22                         |
| Reflections collected                                                                                               | 25636                                                           |
| Independent reflections                                                                                             | 8585 [R <sub>int</sub> = 0.0568, R <sub>sigma</sub> = 0.0498]   |
| Data/restraints/parameters                                                                                          | 8585/0/559                                                      |
| Goodness-of-fit on F <sup>2</sup>                                                                                   | 1.026                                                           |
| Final R indexes [I >= 2σ (I)]                                                                                       | R <sub>1</sub> = 0.0682, wR <sub>2</sub> = 0.1818               |
| Final R indexes [all data]                                                                                          | R <sub>1</sub> = 0.0841, wR <sub>2</sub> = 0.1965               |
| Largest diff. peak/hole / e Å <sup>-3</sup>                                                                         | 0.62/-0.48                                                      |

### 3) Selected $^1\text{H}$ , $^{13}\text{C}$ , DEPT-135, ATP, COSY, HSQC, HMBC and DOSY NMR spectra

Figure S5.  $^1\text{H}$ ,  $^{13}\text{C}$  NMR spectra of  $(^{\text{Mes}}\text{DPM})\text{MgN}(\text{SiMe}_3)_2$  (**1**) in benzene- $d_6$ (\*).

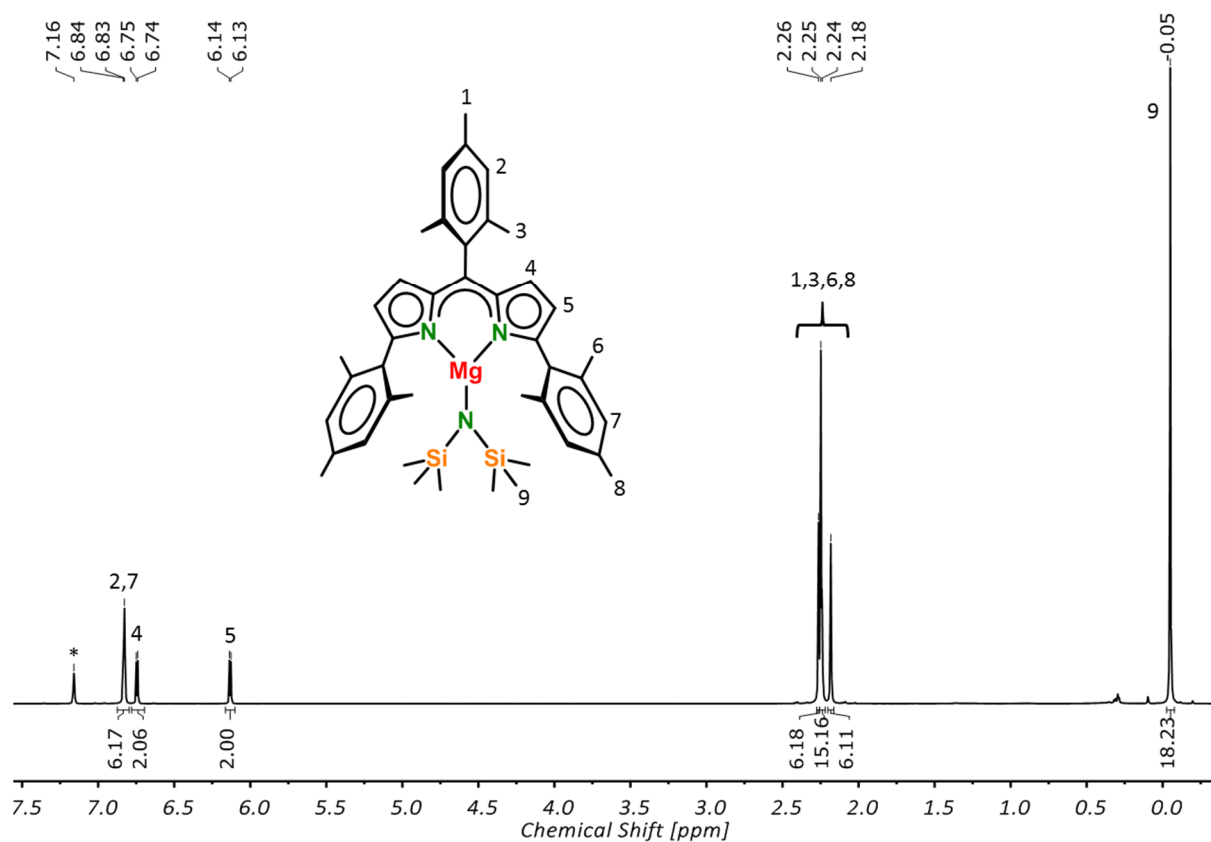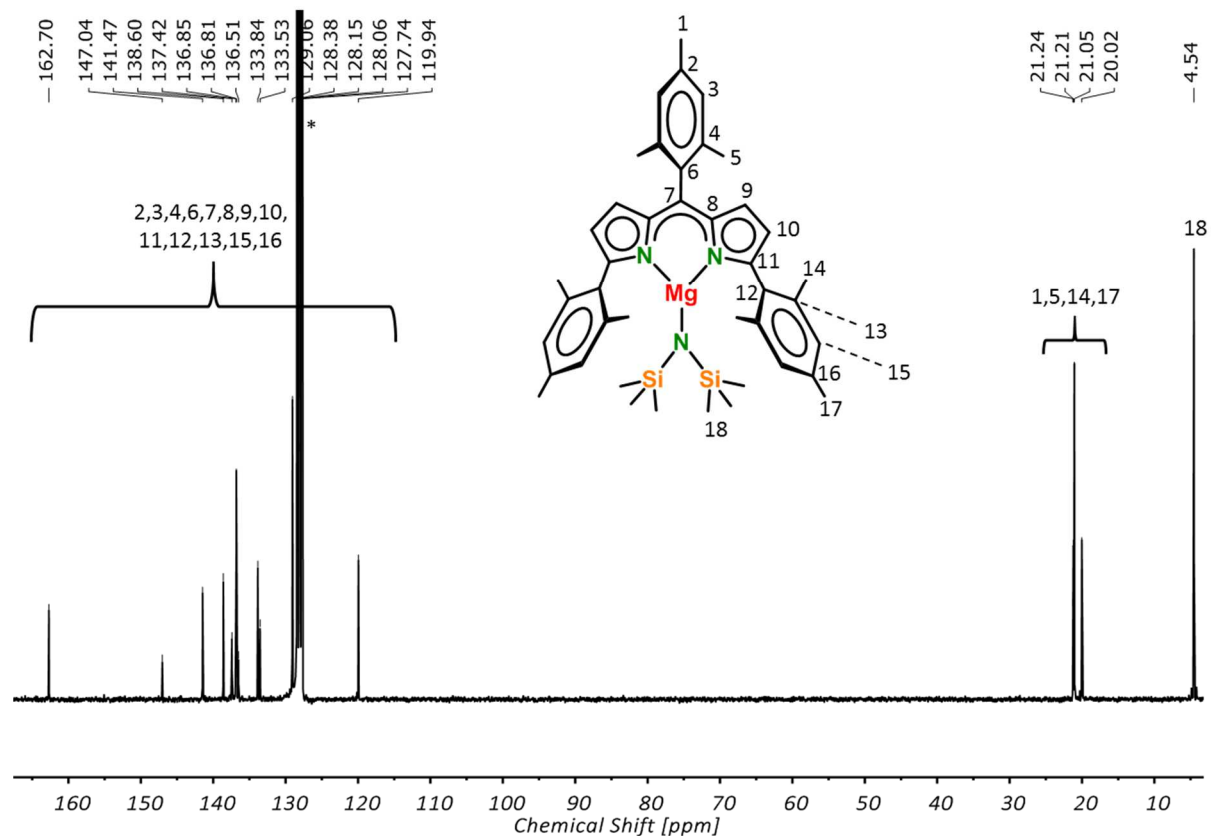

**Figure S6.**  $^1\text{H}$ ,  $^{13}\text{C}$ , COSY, HSQC and HMBC spectra of  $(^{\text{Mes}}\text{DPM})\text{Mg}(\text{N}(\text{SiMe}_3)_2)(\text{NC-TMS})$  (**2**) in benzene- $d_6$  (\*).

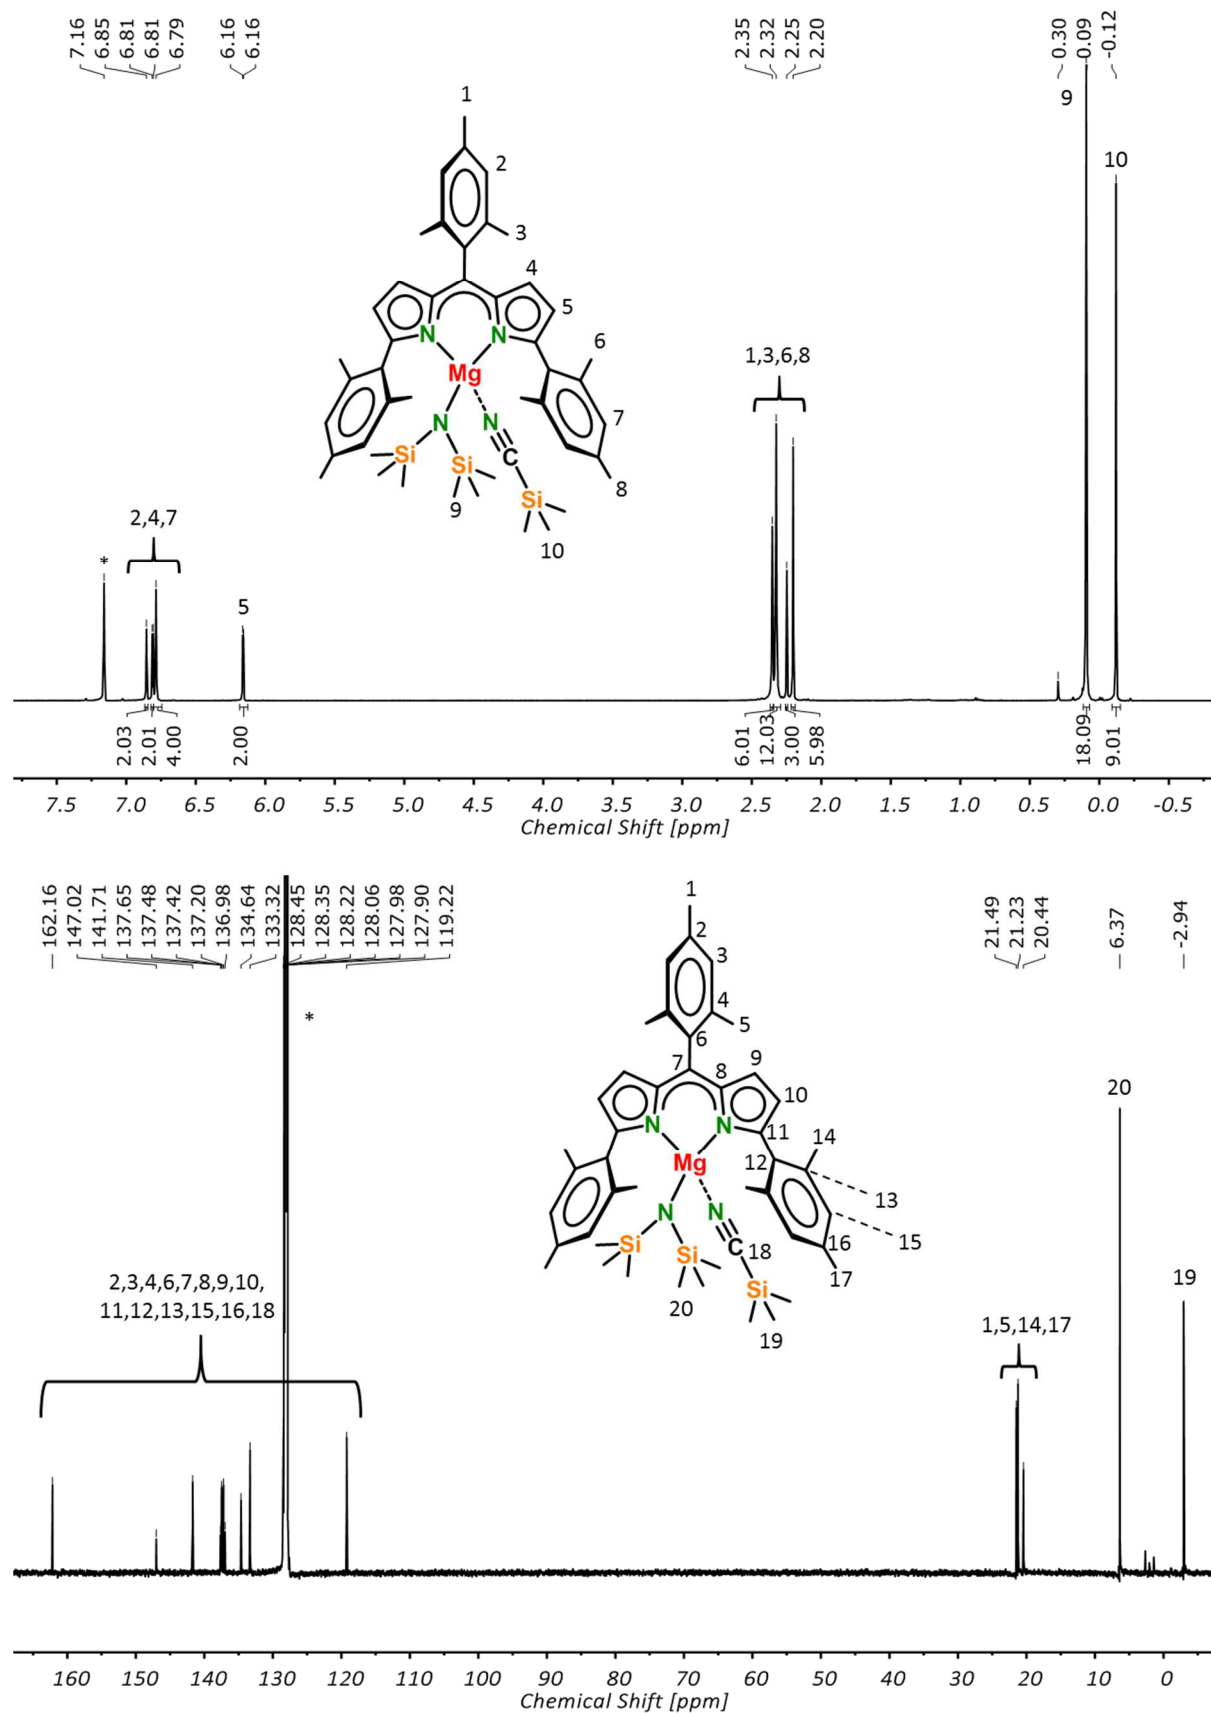

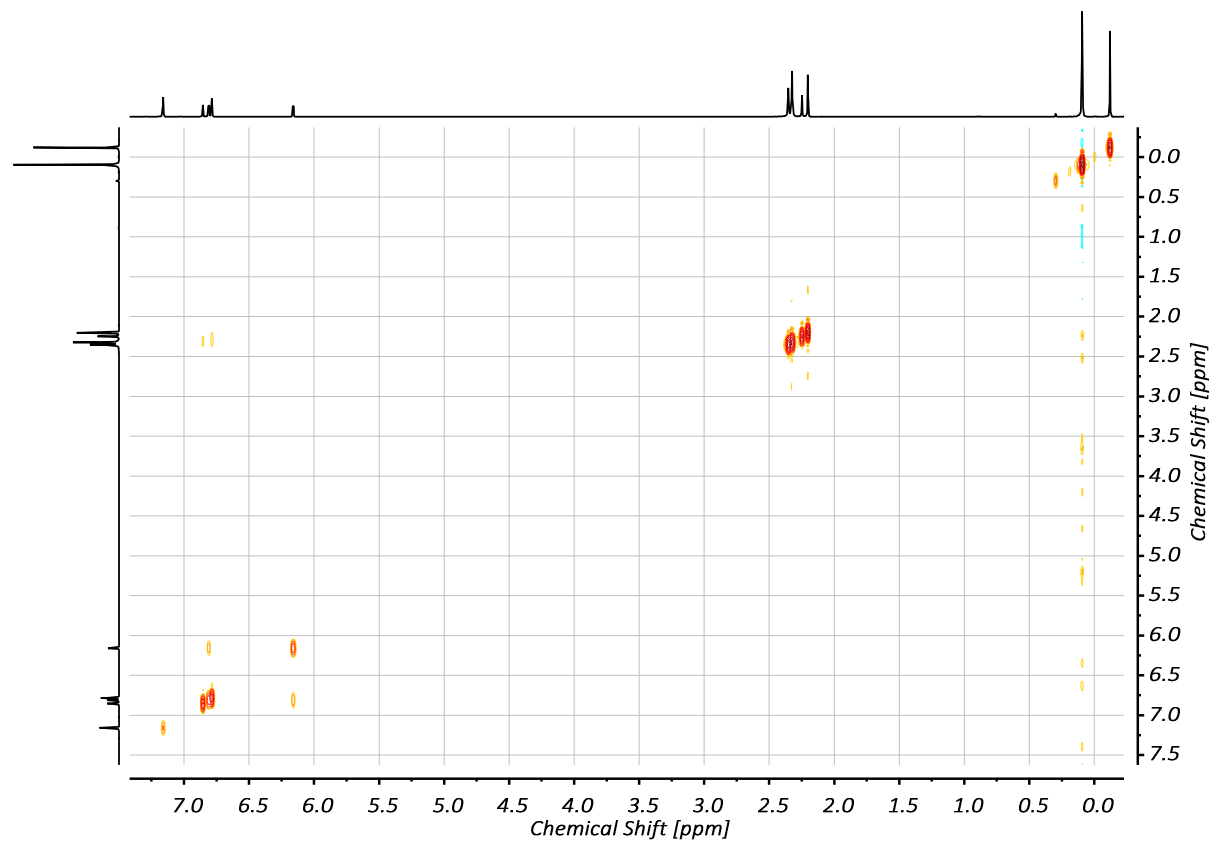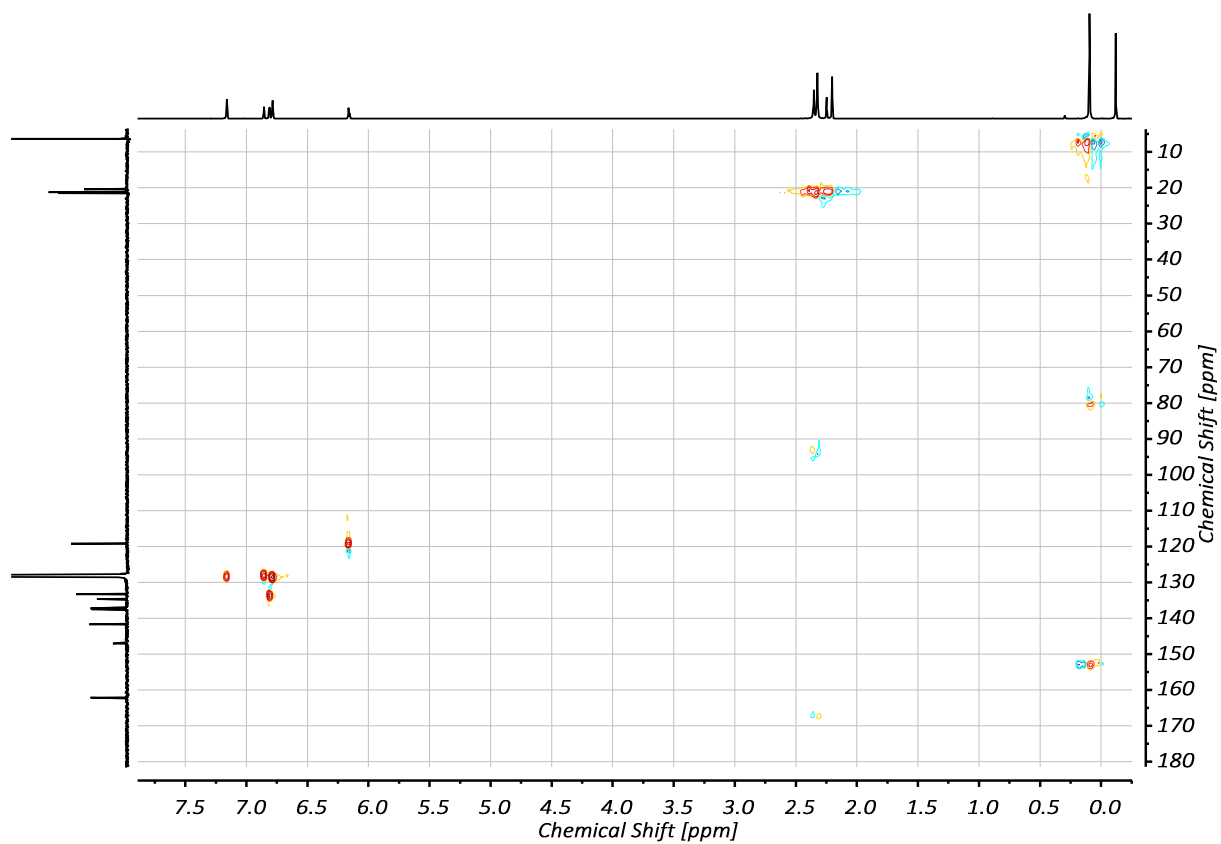

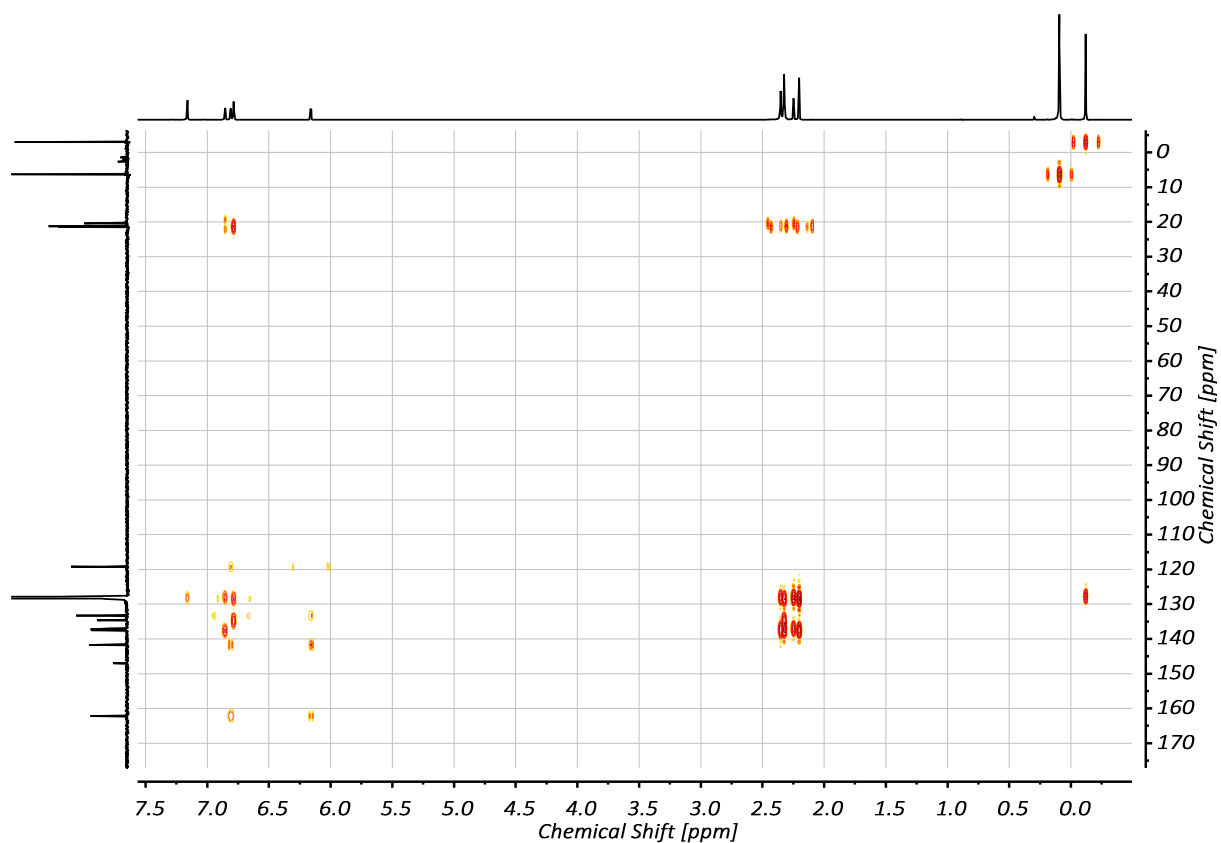

Figure S7.  $^1\text{H}$ ,  $^{13}\text{C}$ , COSY, HSQC and HMBC spectra of  $(^{\text{Mes}}\text{DPM})\text{Mg}(n\text{Bu})$  (**3**) in benzene- $d_6$  (\*).

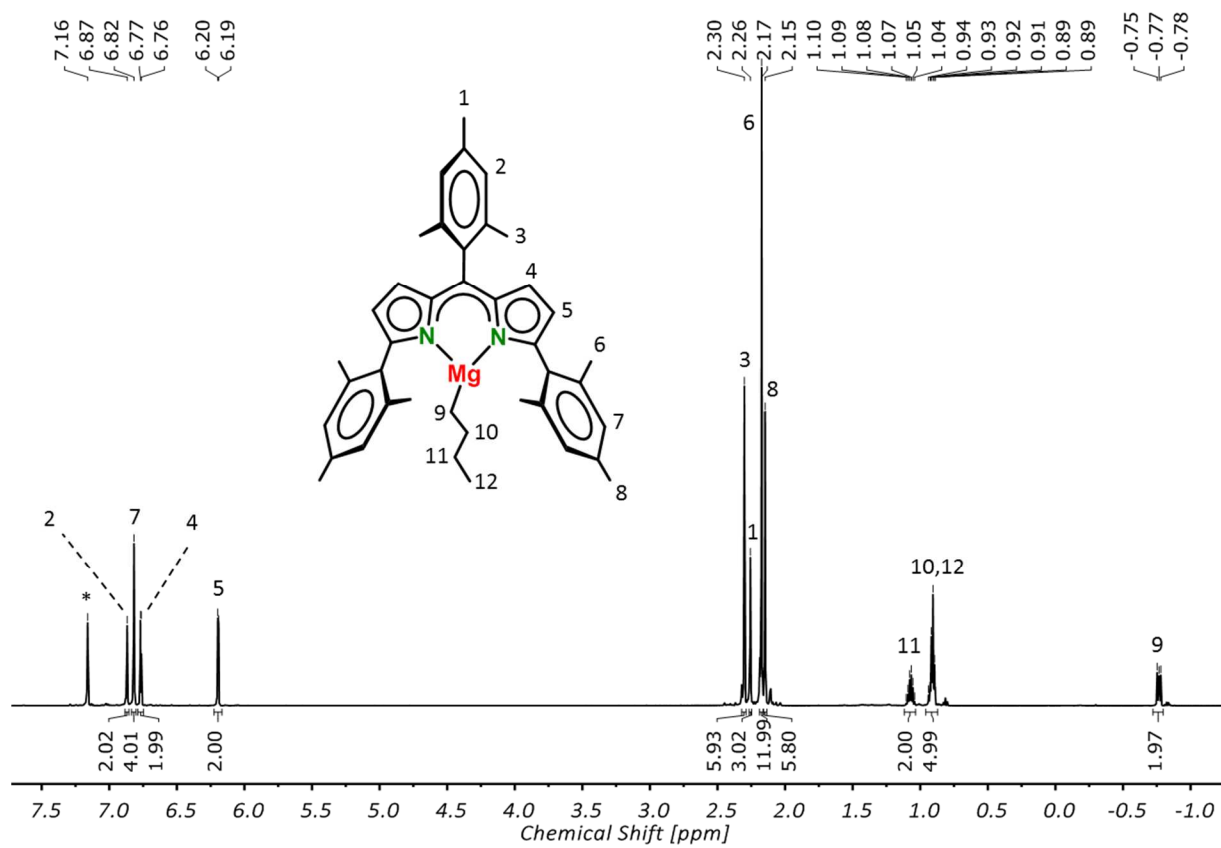



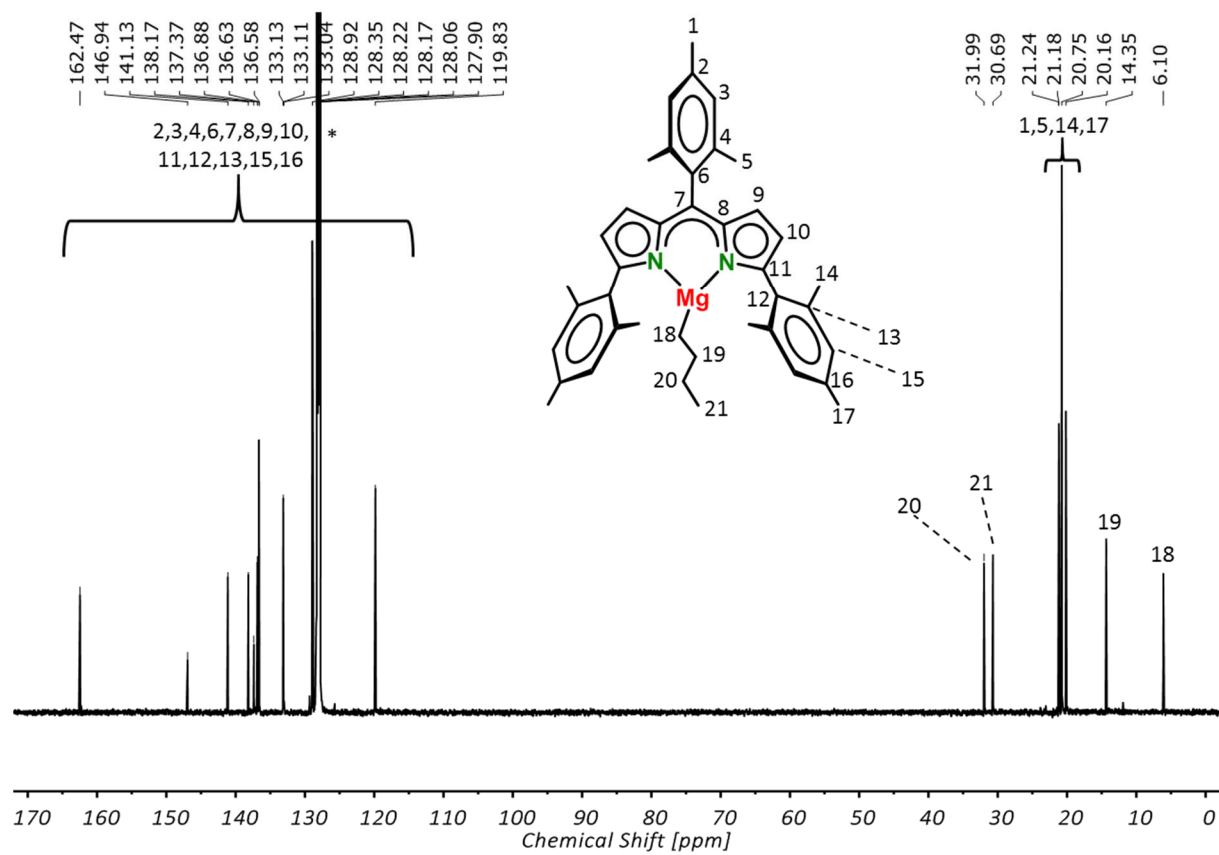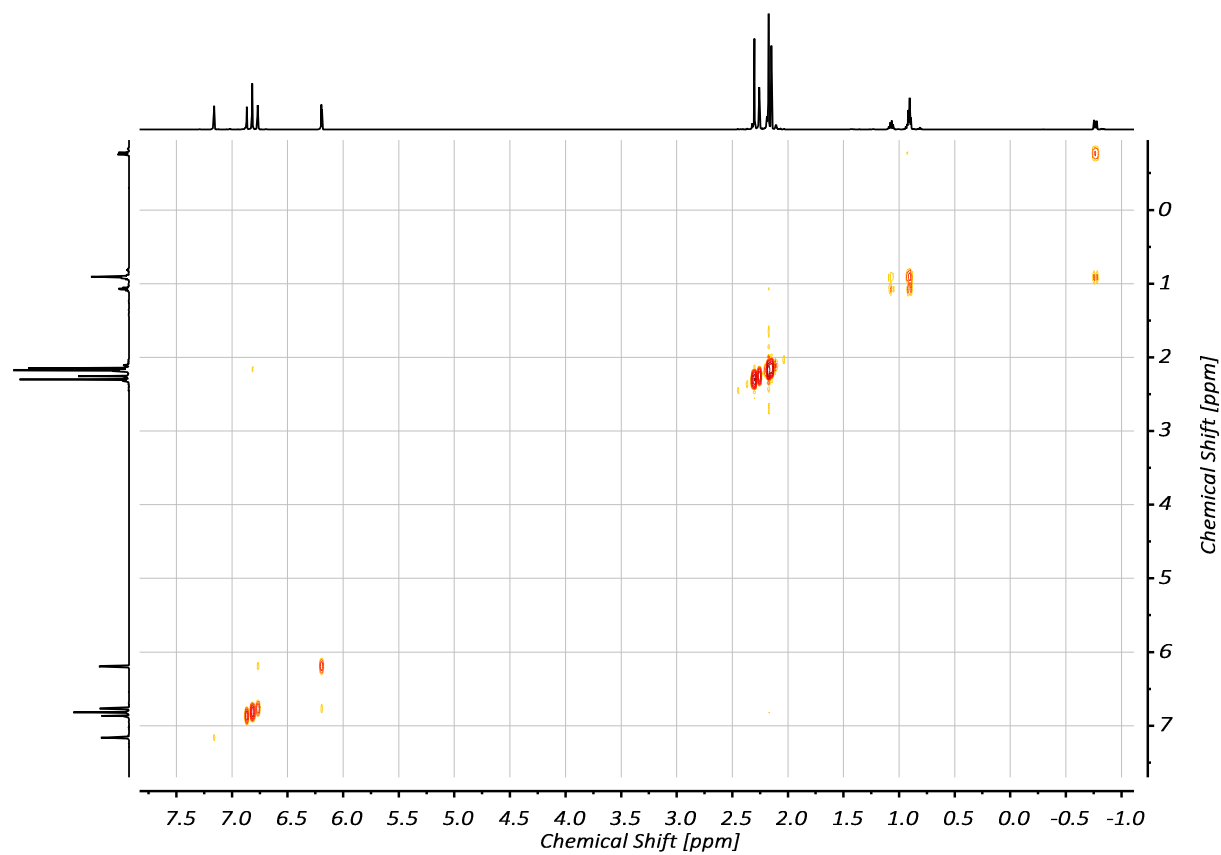

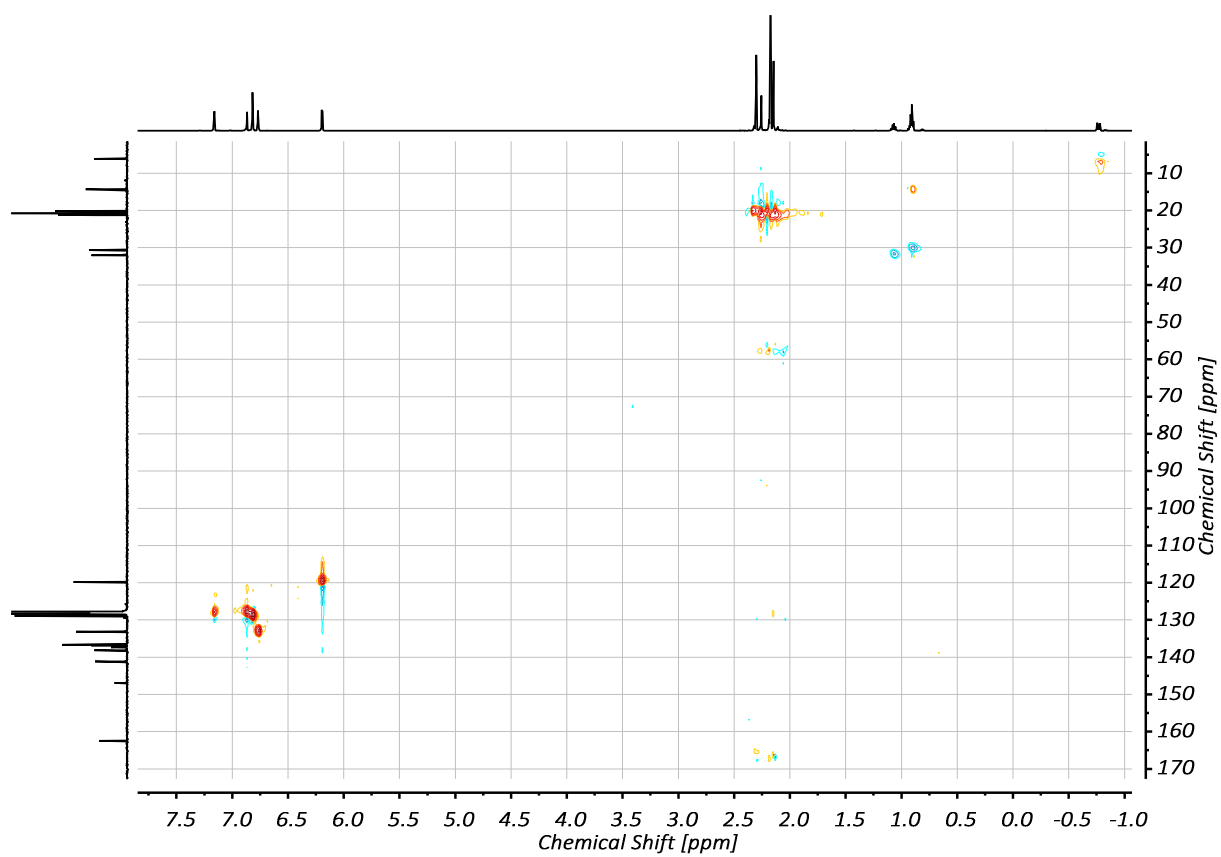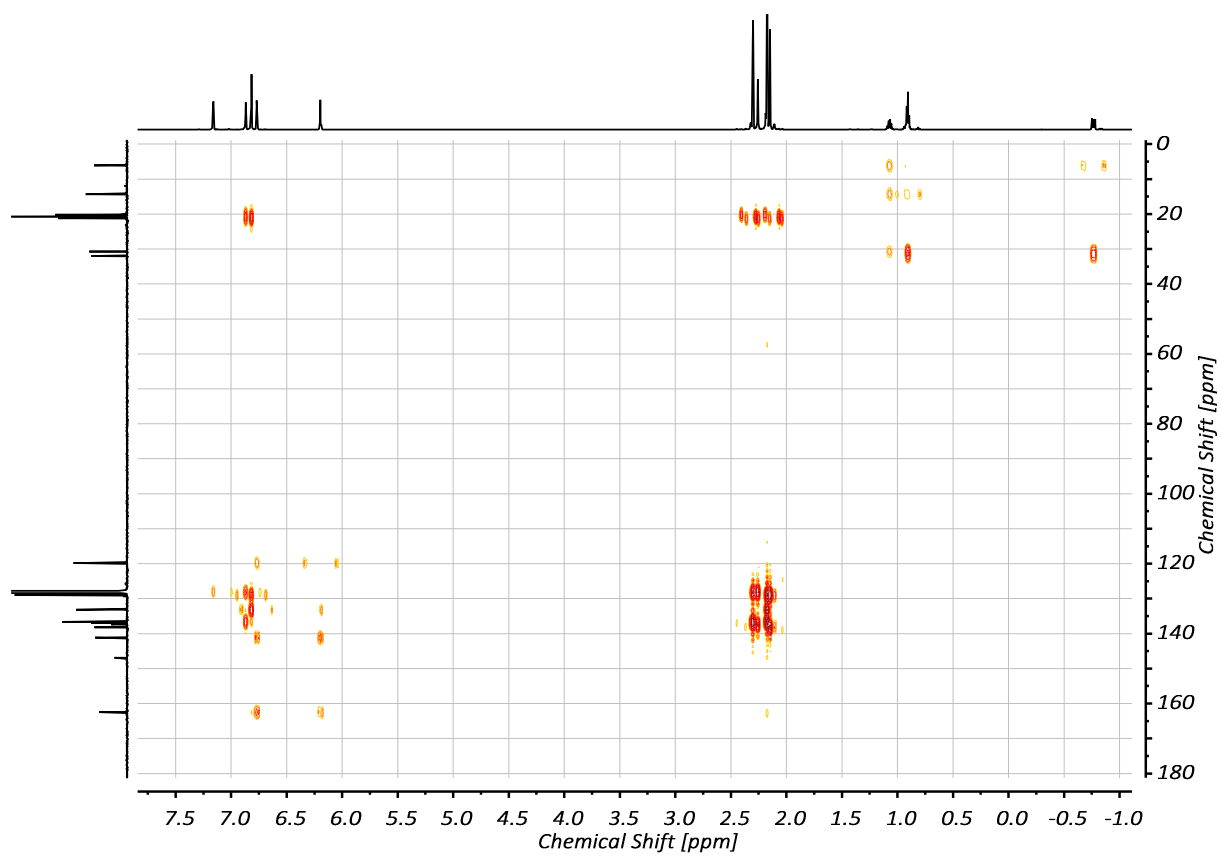

**Figure S8.**  $^1\text{H}$ ,  $^{13}\text{C}$ , COSY, HSQC and HMBC spectra of  $(^{\text{Mes}}\text{DPM})\text{MgNC}(\text{THF})_2$  (**4**) in benzene- $d_6$  (\*).

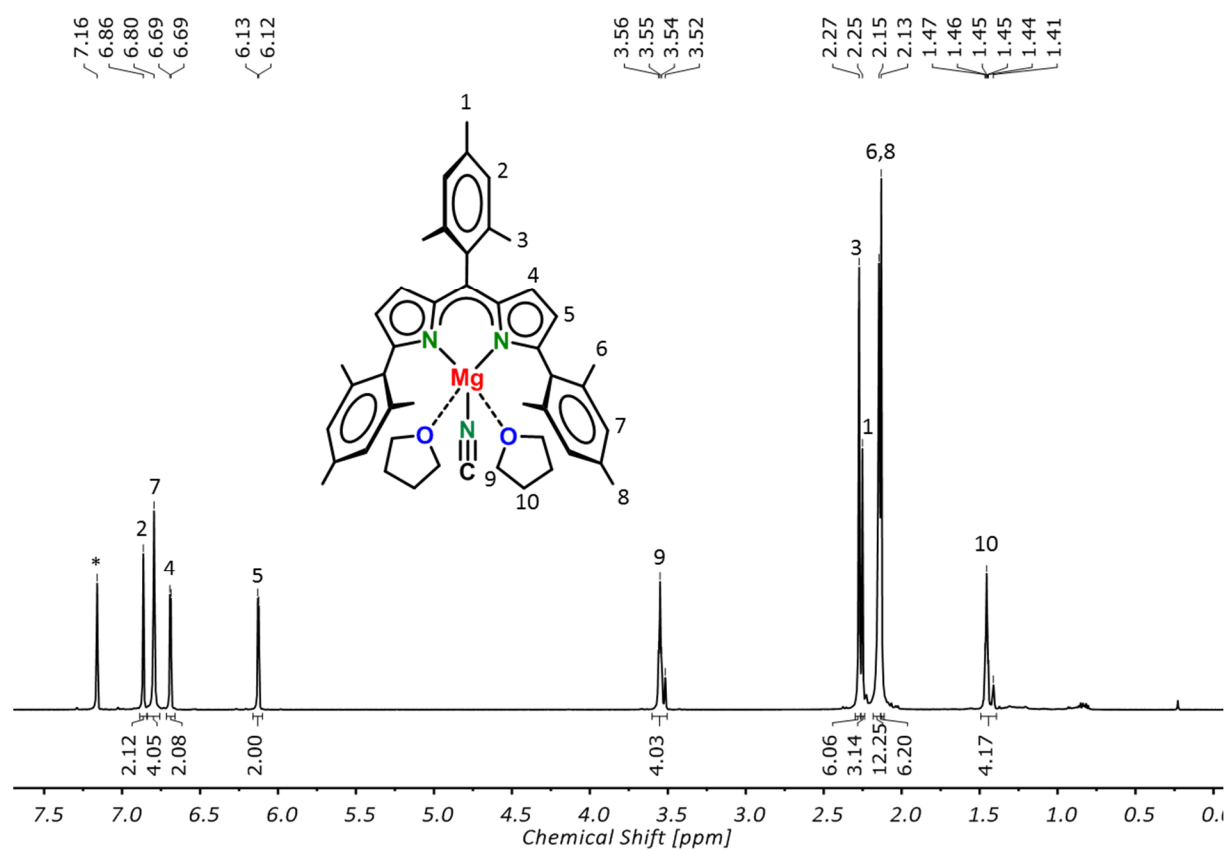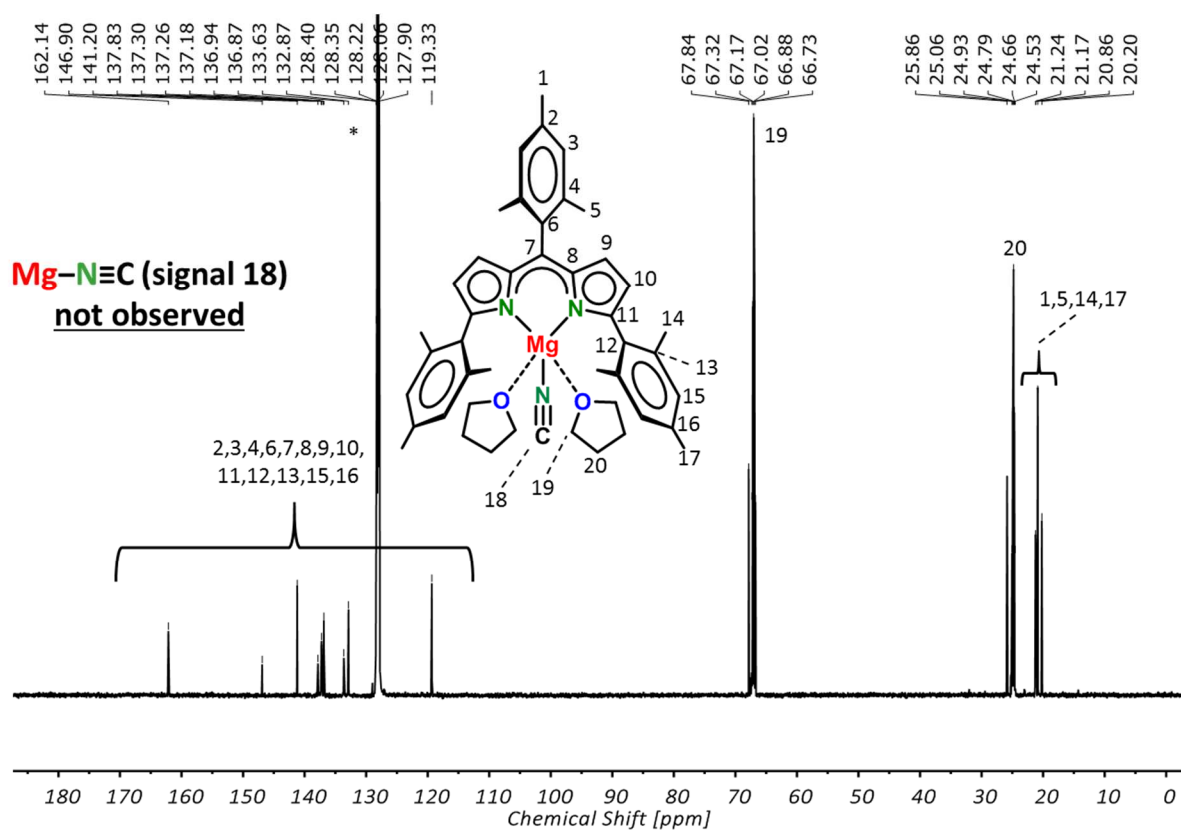

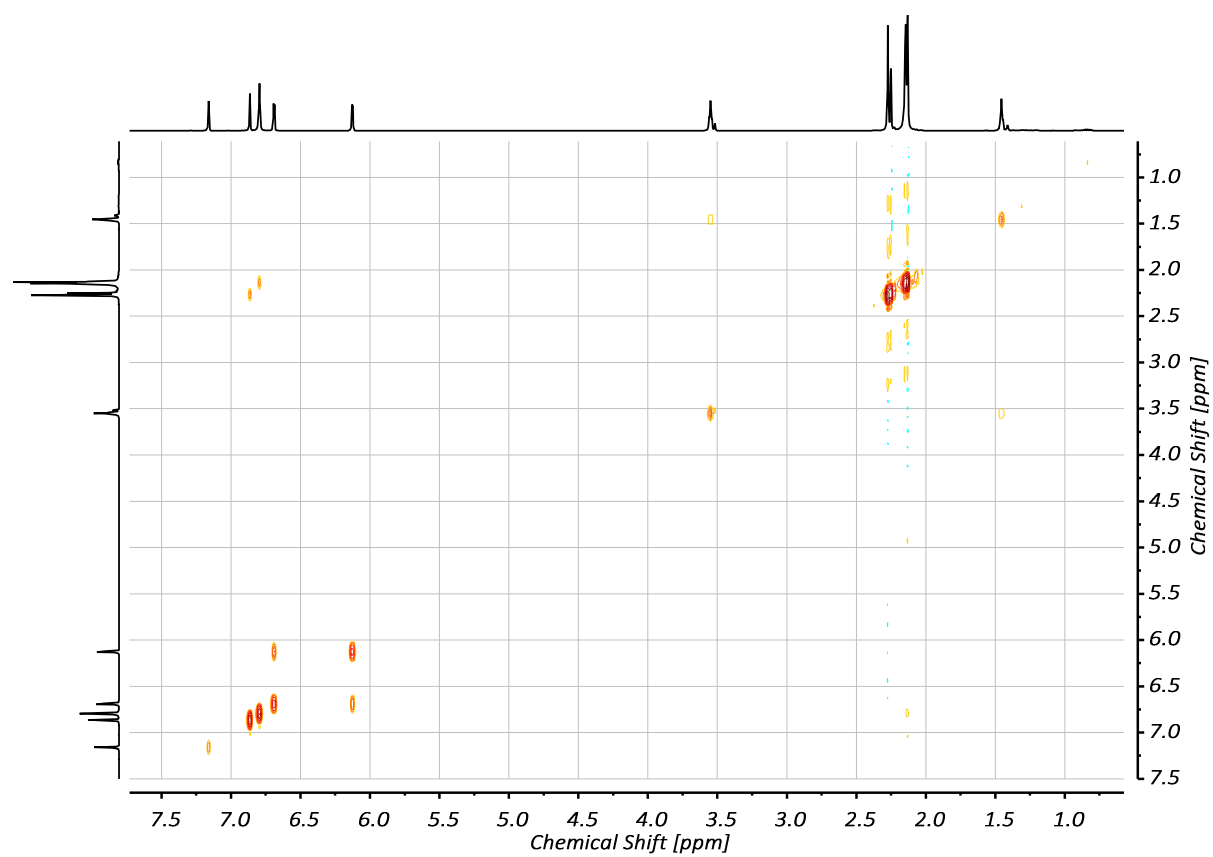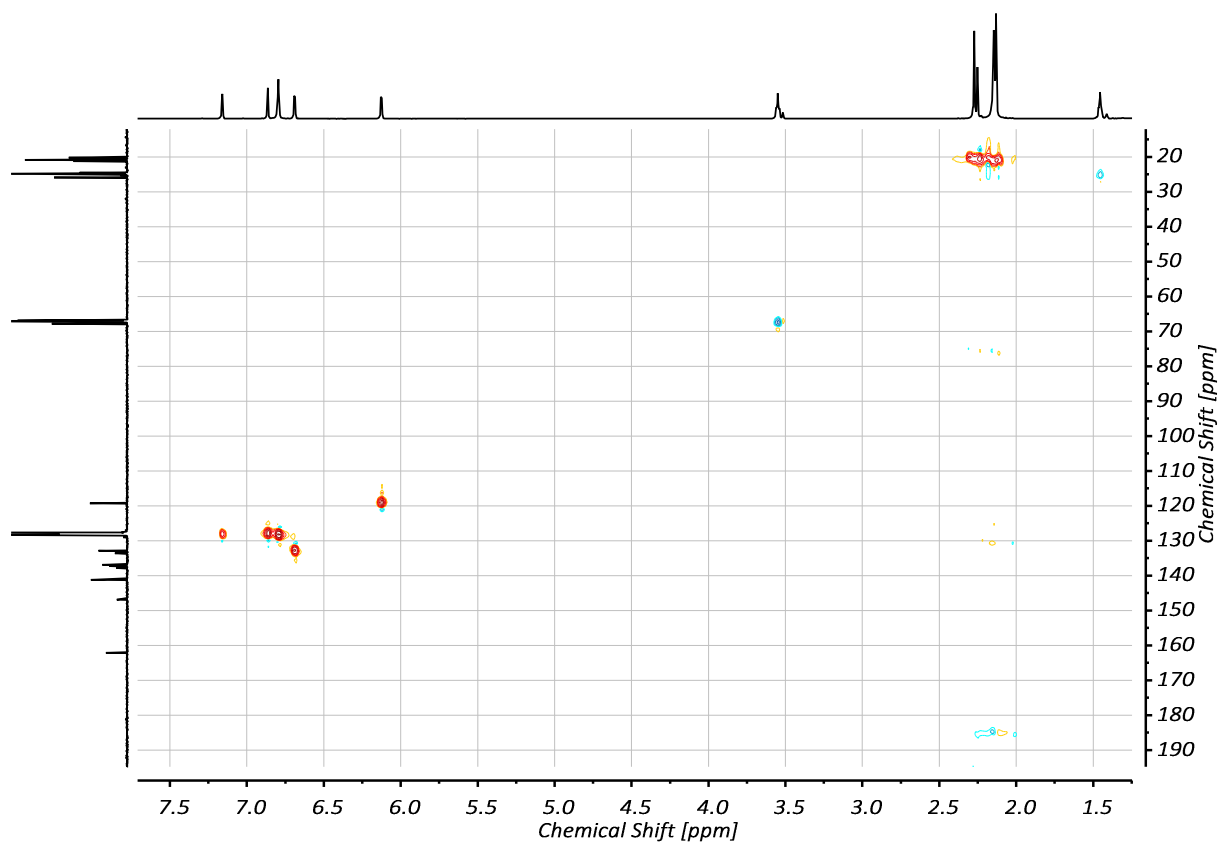

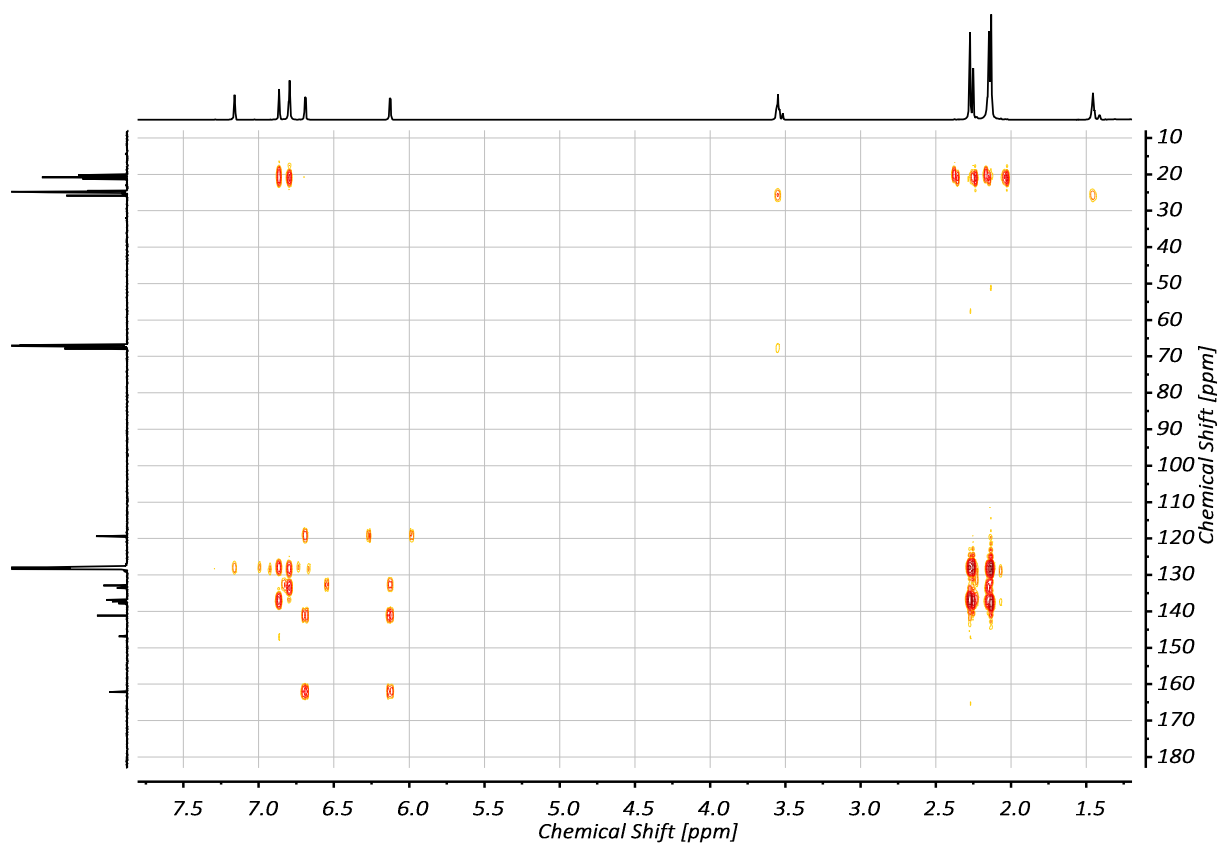

**Figure S9.**  $^1\text{H}$ ,  $^{13}\text{C}$ , DEPT-135, ATP, COSY, HSQC and HMBC spectra of  $(^{\text{Mes}}\text{DPM})\text{MgNC}(\text{THF})_2$  (**4**) in  $\text{THF-}d_8$  (\*).

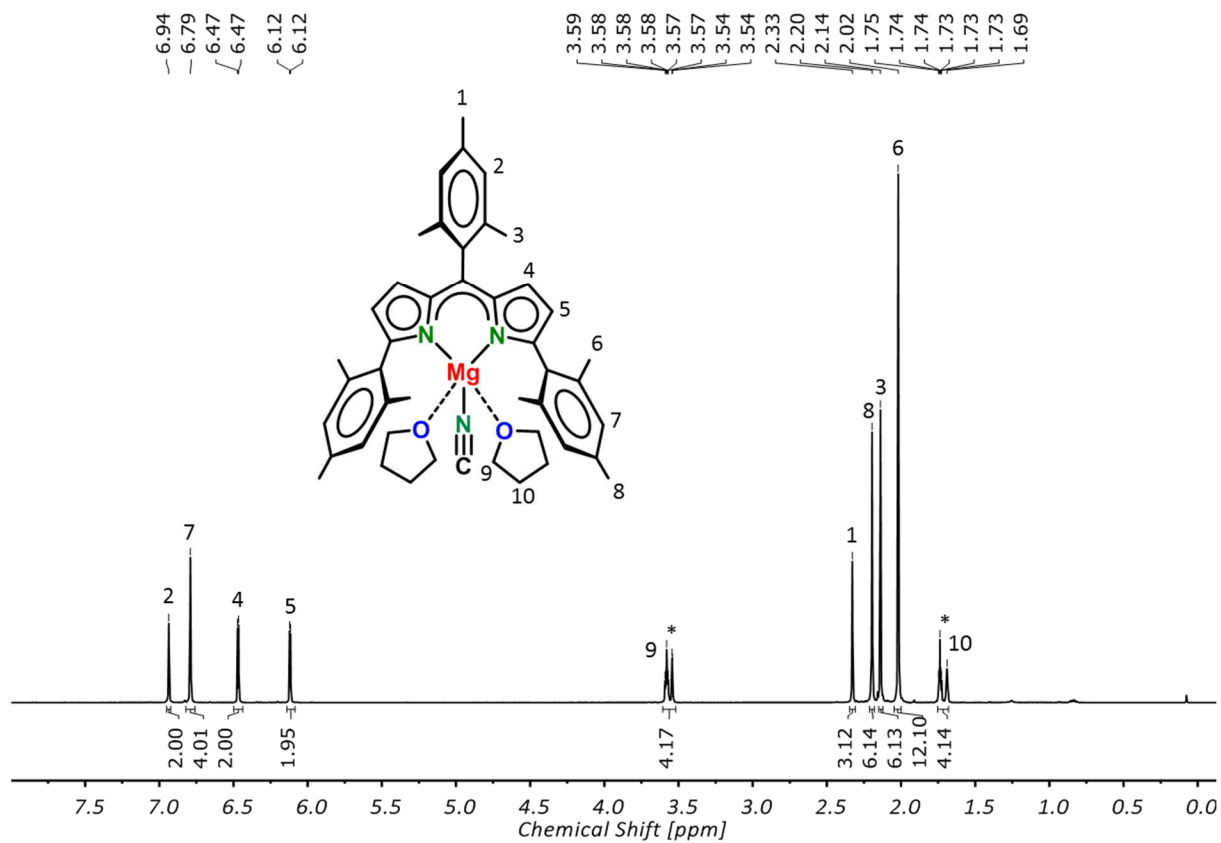

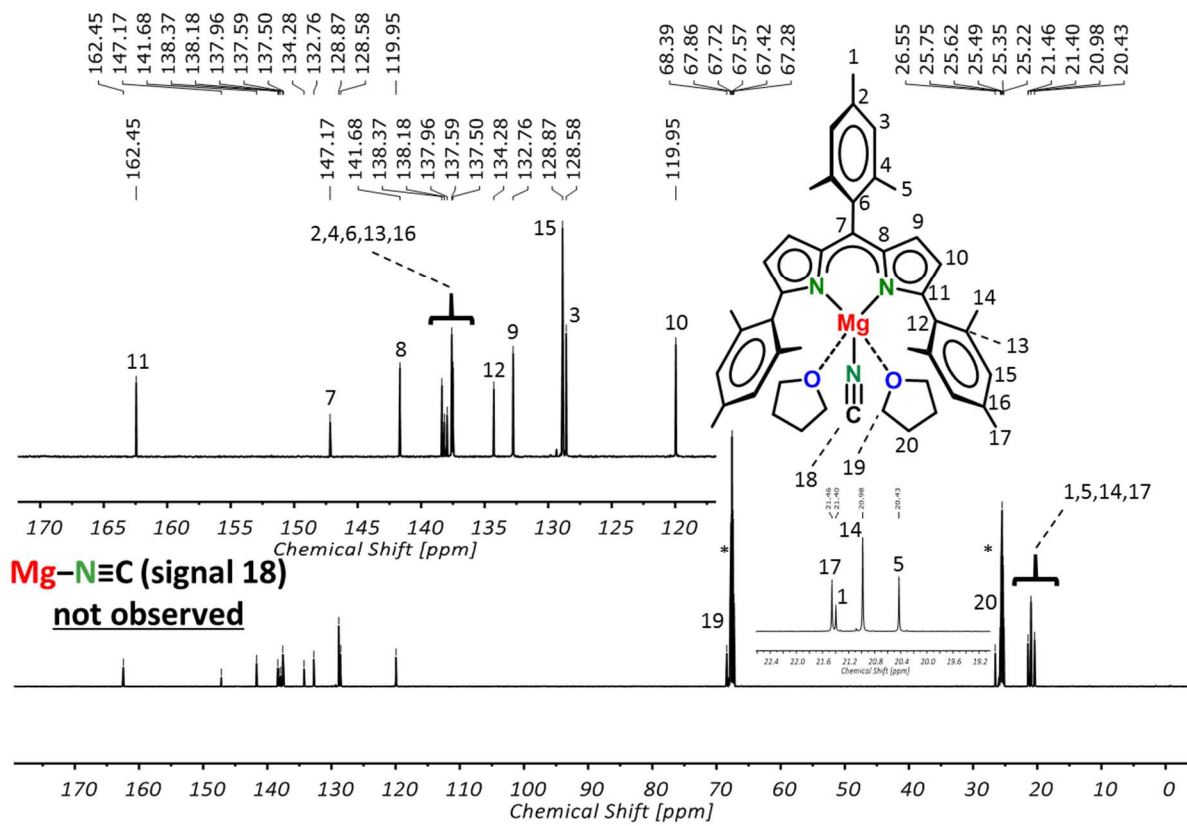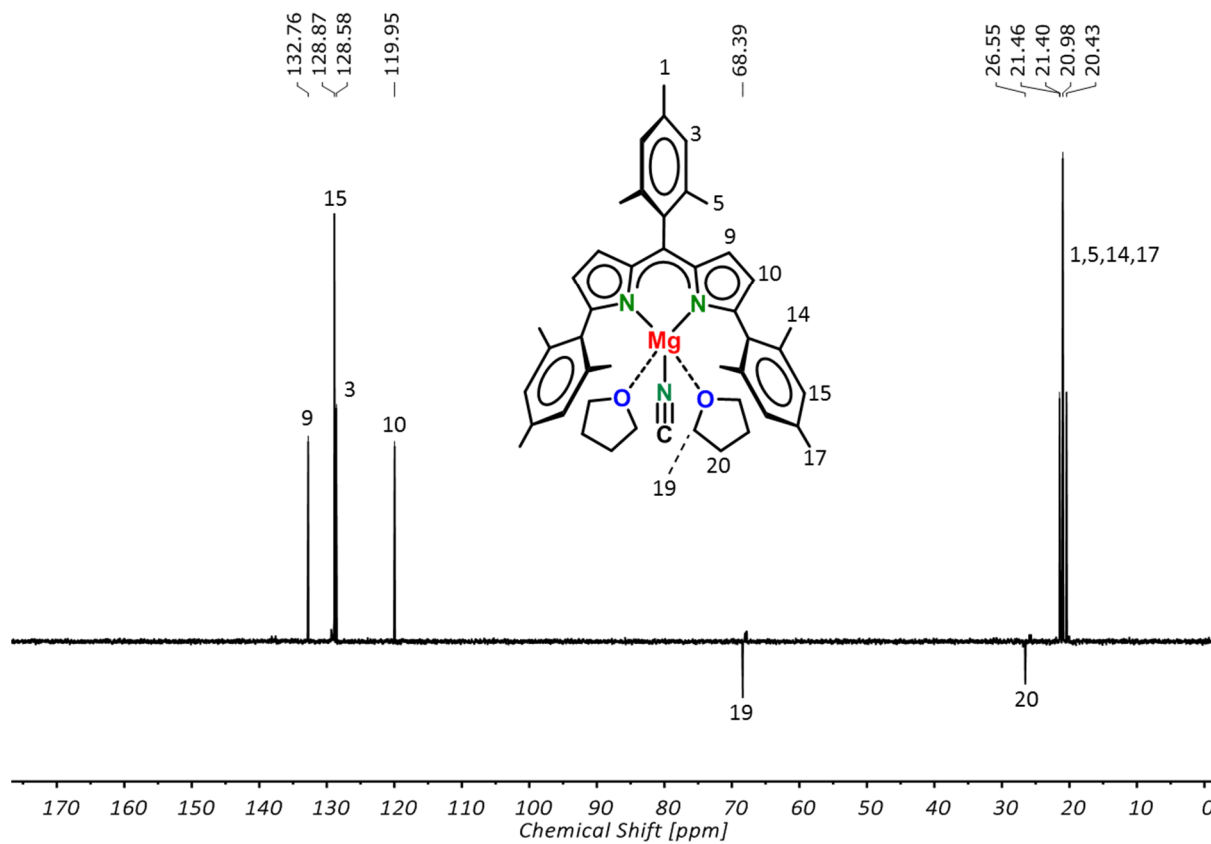

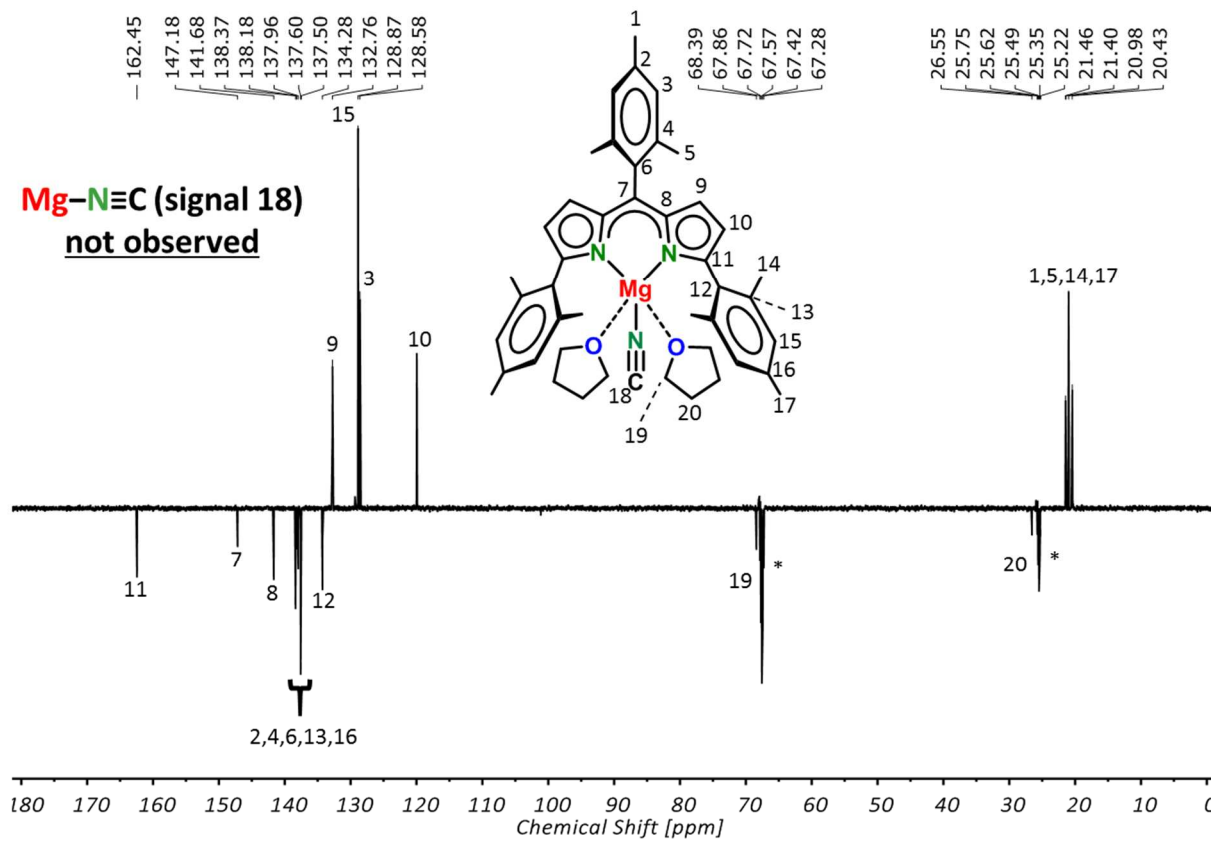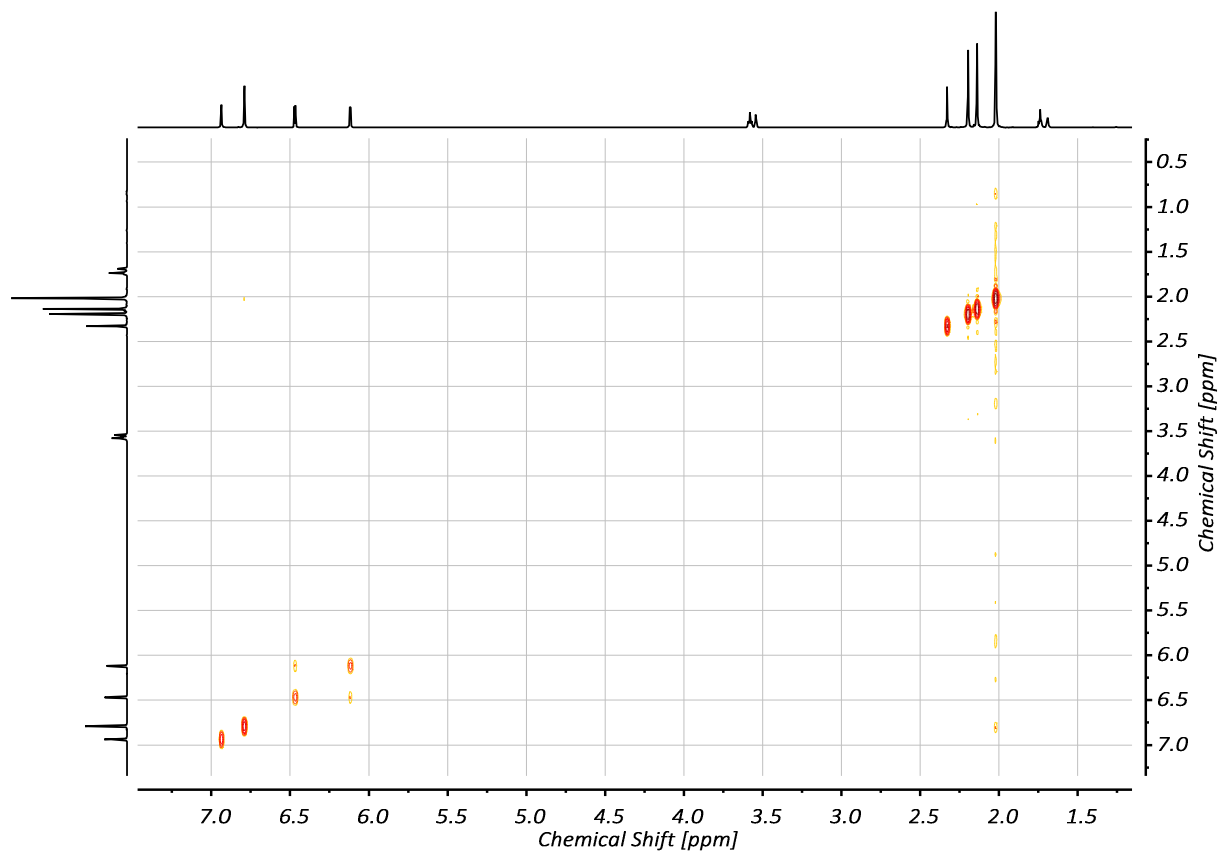

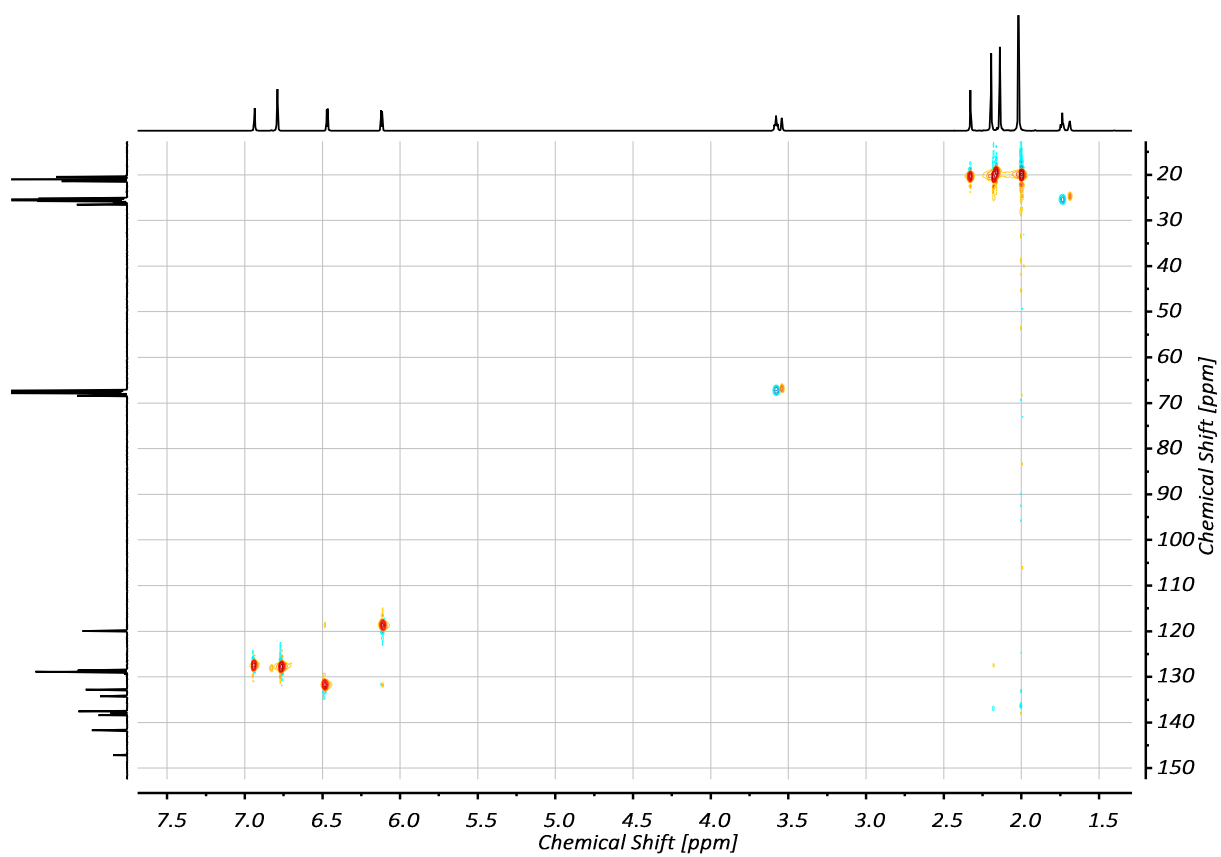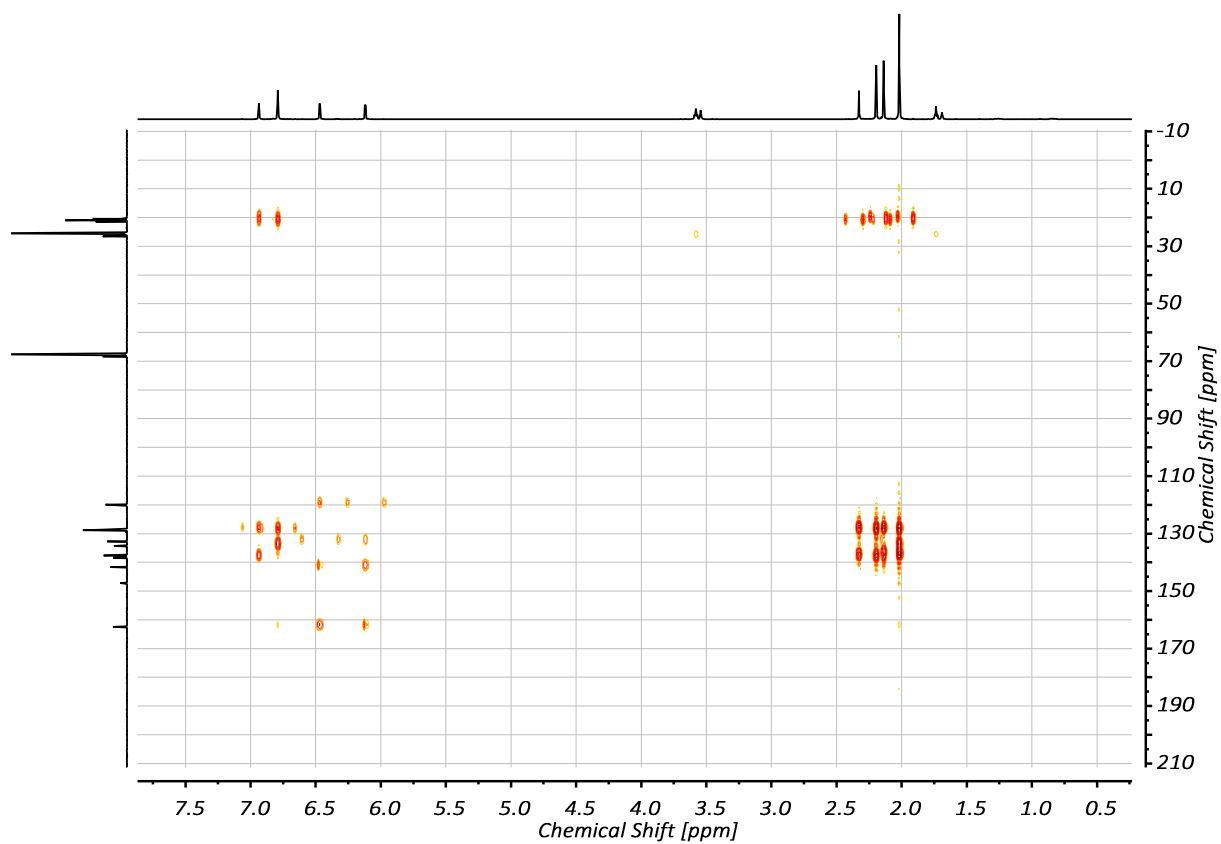



**Figure S10.** High-temperature  $^{13}\text{C}$  NMR spectra of  $(^{\text{Mes}}\text{DPM})\text{MgNC}(\text{THF})_2$  (**4**) in  $\text{THF-}d_8$  (\*), measured at 25°C (black) and 45°C (red).

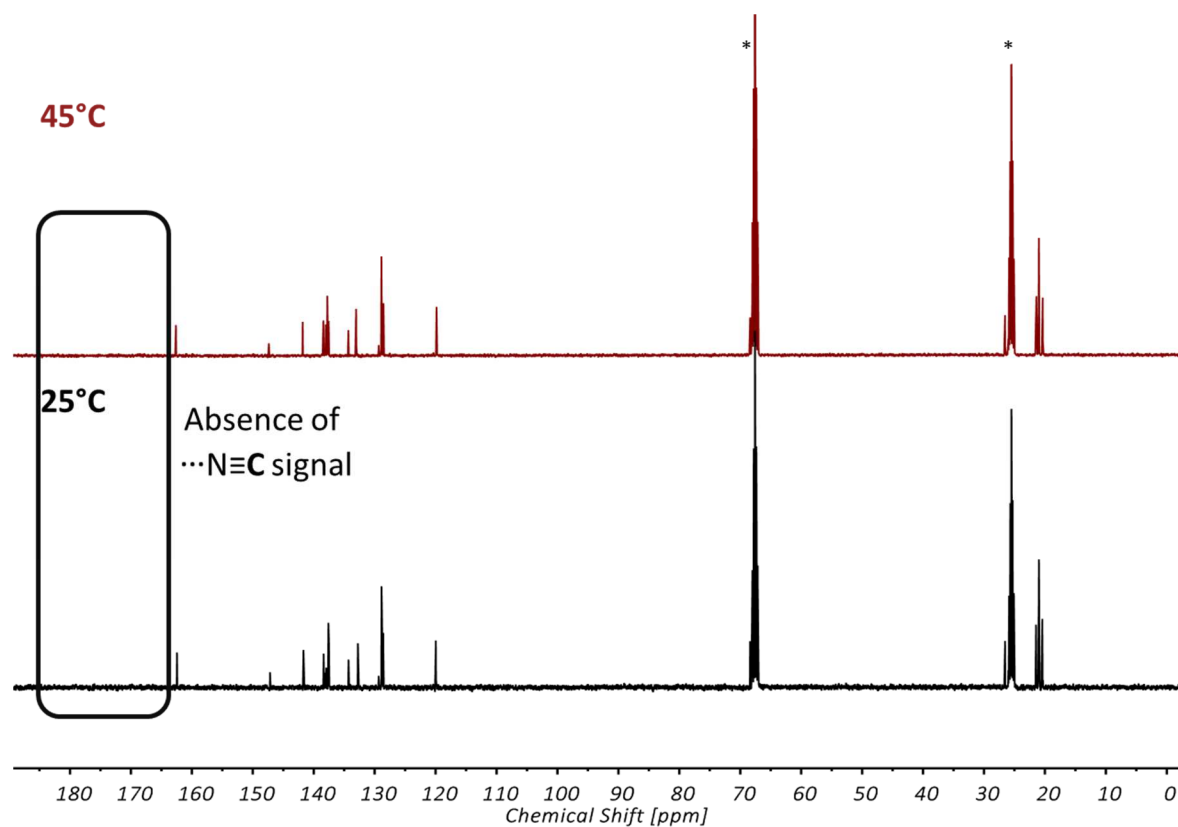

**Figure S11.** High-temperature  $^{13}\text{C}$  NMR spectra of  $(^{\text{Mes}}\text{DPM})\text{MgN}^{13}\text{C}(\text{THF})_2$  in  $\text{THF-}d_8$  (\*), measured from 25°C (black) to 55°C (green).

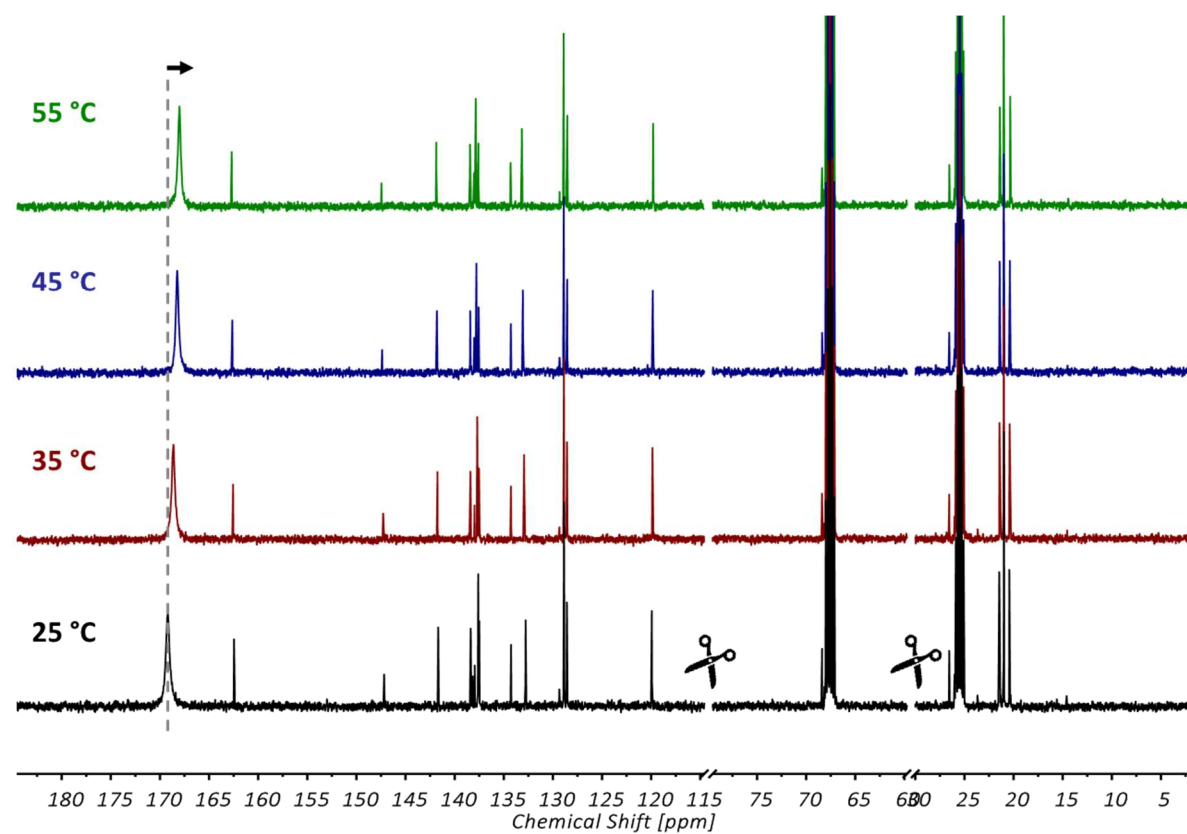

**Figure S12.** Low-temperature  $^{13}\text{C}$  NMR spectra of  $(^{\text{Mes}}\text{DPM})\text{MgN}^{13}\text{C}(\text{THF})_2$  in  $\text{THF-}d_8$  (\*), measured from  $20^\circ\text{C}$  to  $-85^\circ\text{C}$ .

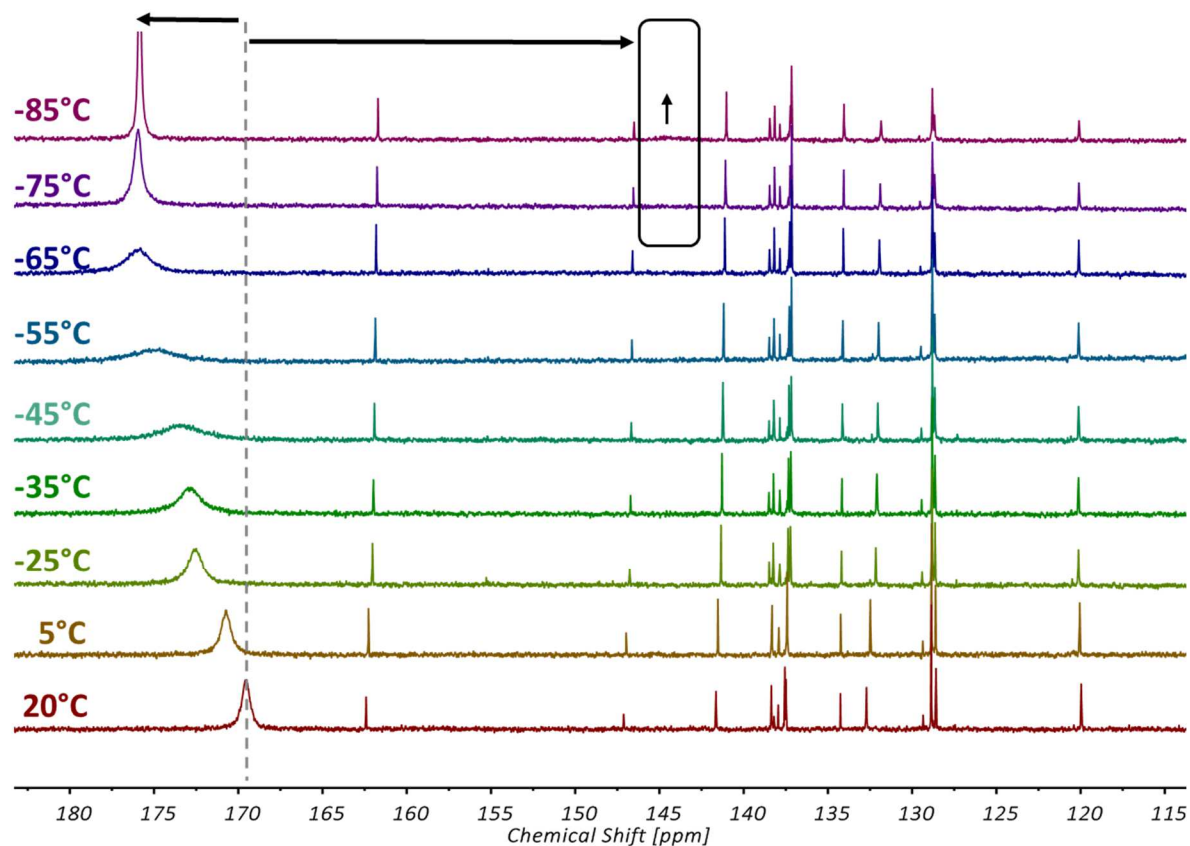

**Figure S13.** Low-temperature  $^{13}\text{C}$  NMR spectra of  $(^{\text{Mes}}\text{DPM})\text{MgN}^{13}\text{C}(\text{THF})_2$  in  $\text{THF-}d_8$  (\*), measured at  $-86^\circ\text{C}$ .

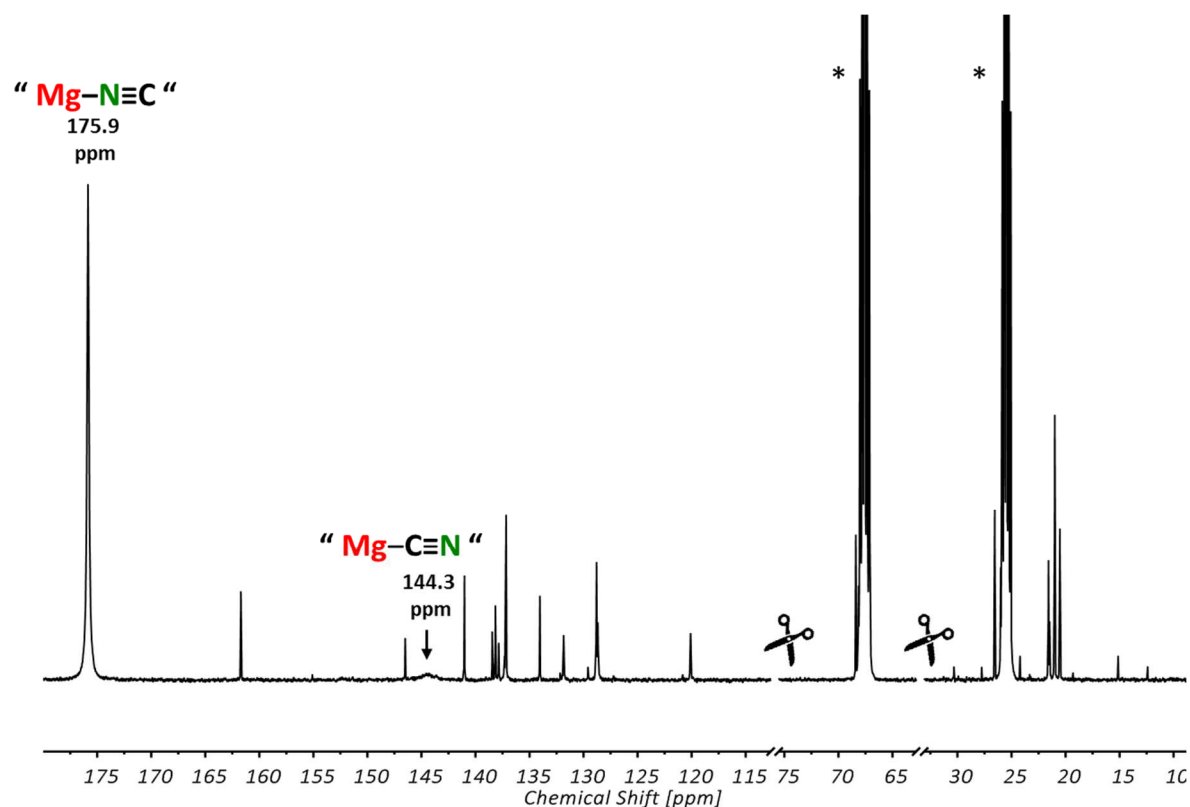

## Diffusion-Ordered-Spectroscopy (DOSY)

**Figure S14.** DOSY NMR spectrum of  $(^{\text{Mes}}\text{DPM})\text{MgNC}(\text{THF})_2$  (**4**) in  $\text{THF-}d_8$ .

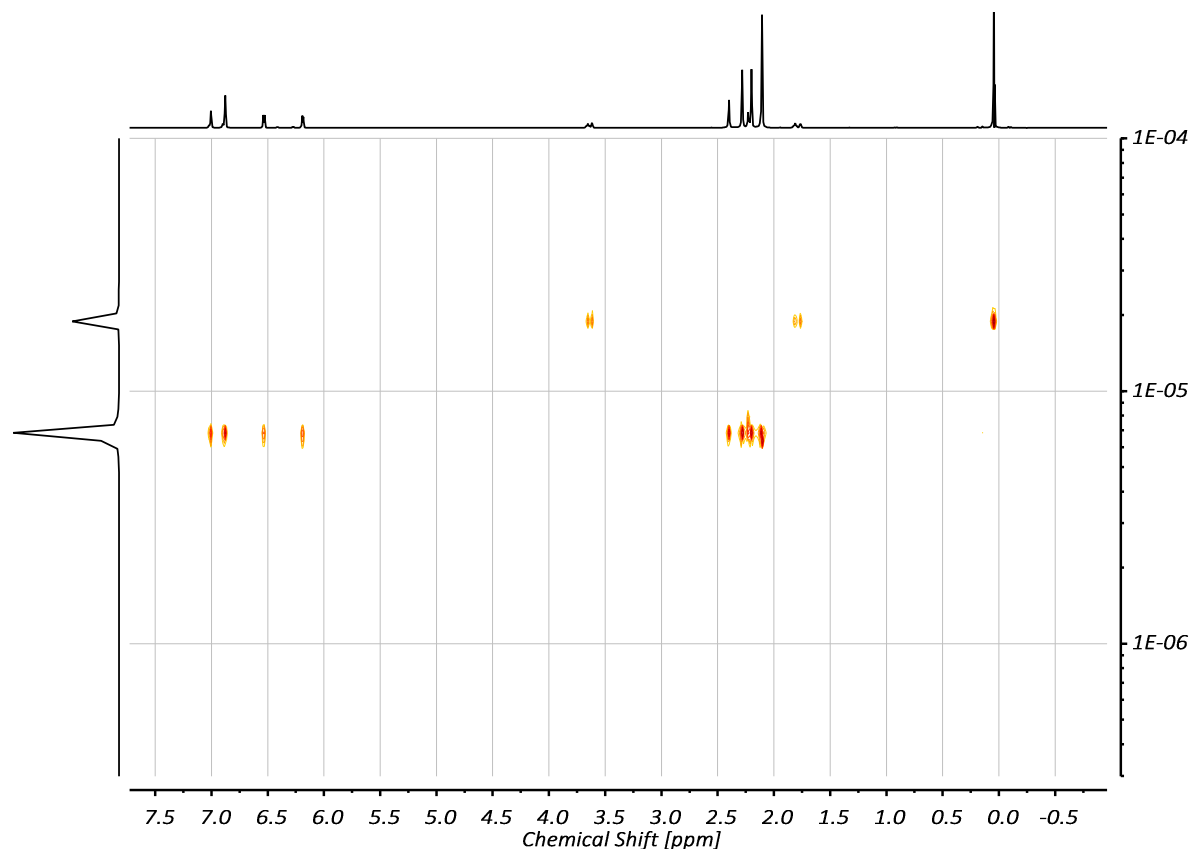

**Table S5.** DOSY parameter for  $(^{\text{Mes}}\text{DPM})\text{MgNC}(\text{THF})_2$  (**4**) in  $\text{THF-}d_8$ .

| Formula                                            | D [m <sup>2</sup> /s]   | MW <sup>Exp.</sup><br>Monomer<br>[g/mol] | MW <sup>Calc.</sup><br>Monomer<br>[g/mol] |
|----------------------------------------------------|-------------------------|------------------------------------------|-------------------------------------------|
| <b>C<sub>37</sub>H<sub>37</sub>N<sub>3</sub>Mg</b> | 6.719*10 <sup>-10</sup> | 539 (DMW)<br>620 (ECC)                   | 548 (without THF)<br>692 (with THF)       |

Diffusion measurements were conducted on a Bruker AVANCE NMR spectrometer operating at 600.13 MHz for proton resonance equipped with a 5 mm PABDO BB/19F-1H/D probe with Z-GRD and actively shielded gradient coil with a maximum gradient strength of 5.3500094 G/mm (at 10 A).

Parameter optimization was carried out empirically employing the pulse programme ledbpgp2s1D using stimulated echo and LED (D21 = 5 ms, longitudinal eddy current delay as a Z-filter) with bipolar gradient pulses (P30) and two spoiling gradients (P19 = 600  $\mu$ s) leading to values for gradient pulse length (P30 = 1250  $\mu$ s, in case of bipolar gradients *little DELTA\*0.5*) and diffusion time (D20 = 60 ms, *big DELTA*). Delay for gradient recovery was set to 200  $\mu$ s.

The diffusion experiment was executed with variable gradients from 2% to 98% gradient strength with 32 increment values (difframp calculated with the AU-program DOSY). In this case the pulse program ledbpgp2s was applied for data acquiring of this pseudo-2D Experiment. Data processing was performed

with the T1/T2 software package (SimFit) of TopSpin (version 3.2, Bruker Biospin) by fitting area data (integration of all peaks of interest of the same molecule) of diffusion decays. From these Stejskal-Tanner fitting curves calculated diffusion constants were obtained and assimilated statistically.

For molecular weight estimation Stalke's method was applied (external calibration curves **ECC**'s under assumption of DSE-shaped molecules (dissipated spheres and ellipsoides) with tetramethylsilane (TMS) as internal reference with normalized diffusion coefficients.<sup>[9,10]</sup>

#### 4) Selected infrared spectra

IR vibrational spectra, shown in **Figure S15 – S17**, were recorded from 3600 to 400  $\text{cm}^{-1}$  (Shimadzu, IRAffinity-1) as KBr pellets at room temperature.

**Figure S15.** IR vibrational spectrum of  $(^{\text{Mes}}\text{DPM})\text{MgN}^{12}\text{C}(\text{THF})_2$  (**4**).

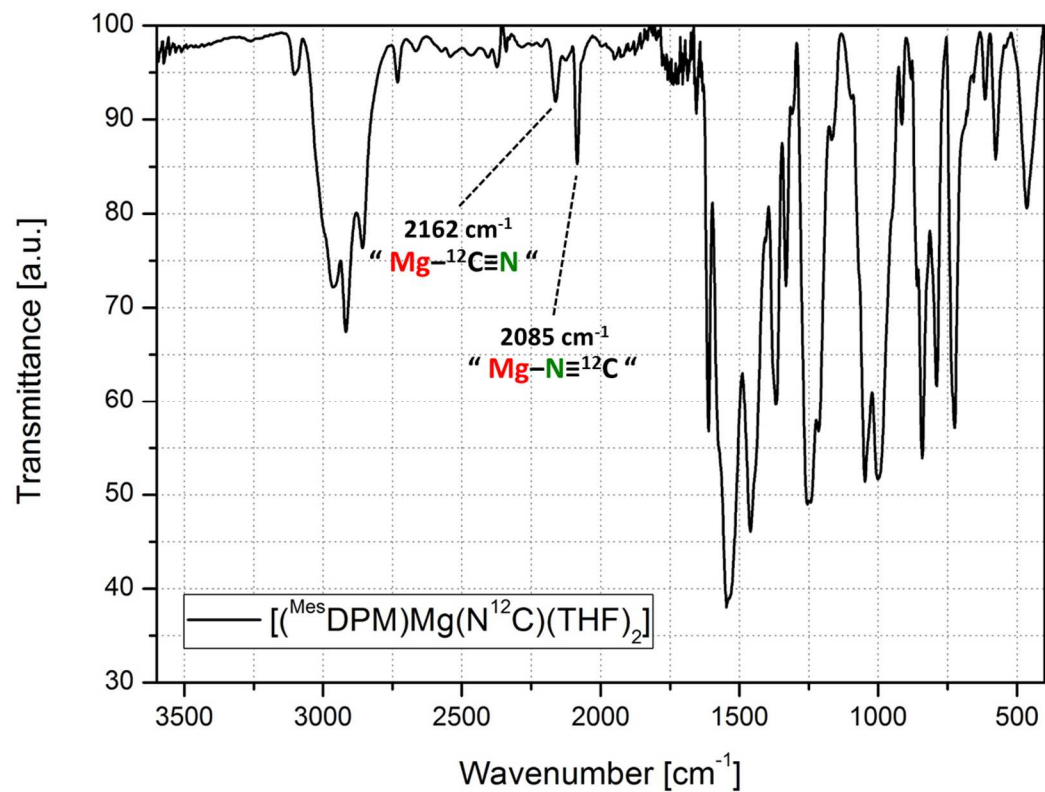

**Figure S16.** IR vibrational spectrum of  $(^{\text{Mes}}\text{DPM})\text{MgN}^{13}\text{C}(\text{THF})_2$ .

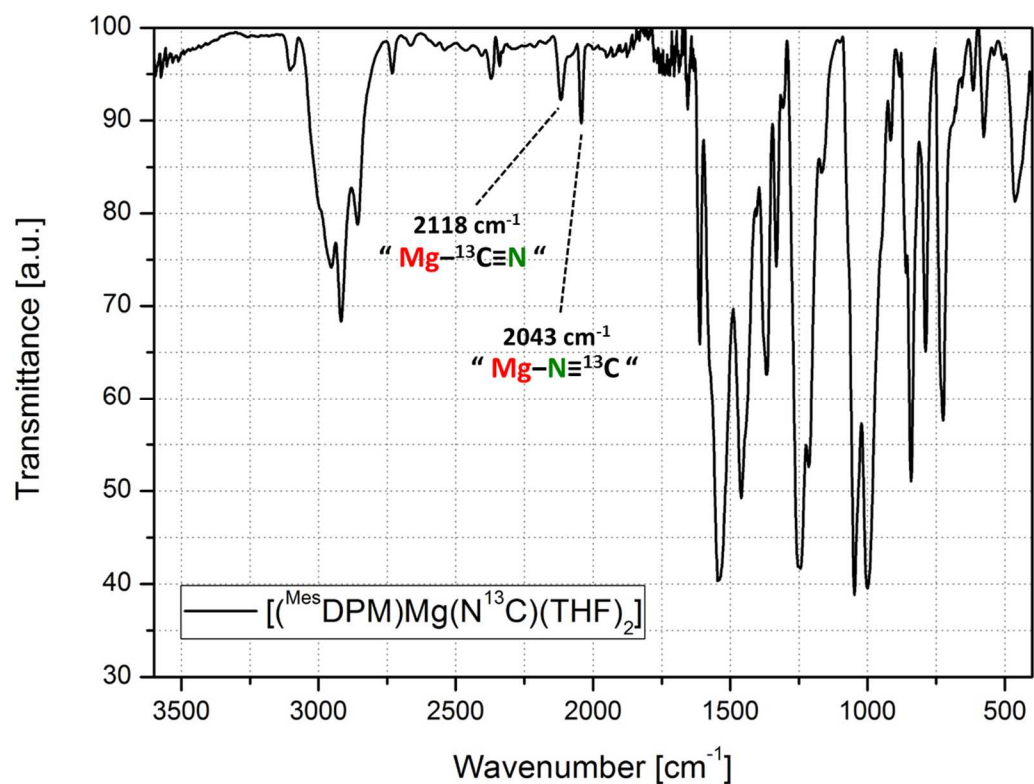

**Figure S17.** Superimposed IR vibrational spectra of  $(^{\text{Mes}}\text{DPM})\text{MgN}^{12}\text{C}(\text{THF})_2$  (black) and  $(^{\text{Mes}}\text{DPM})\text{MgN}^{13}\text{C}(\text{THF})_2$  (red).

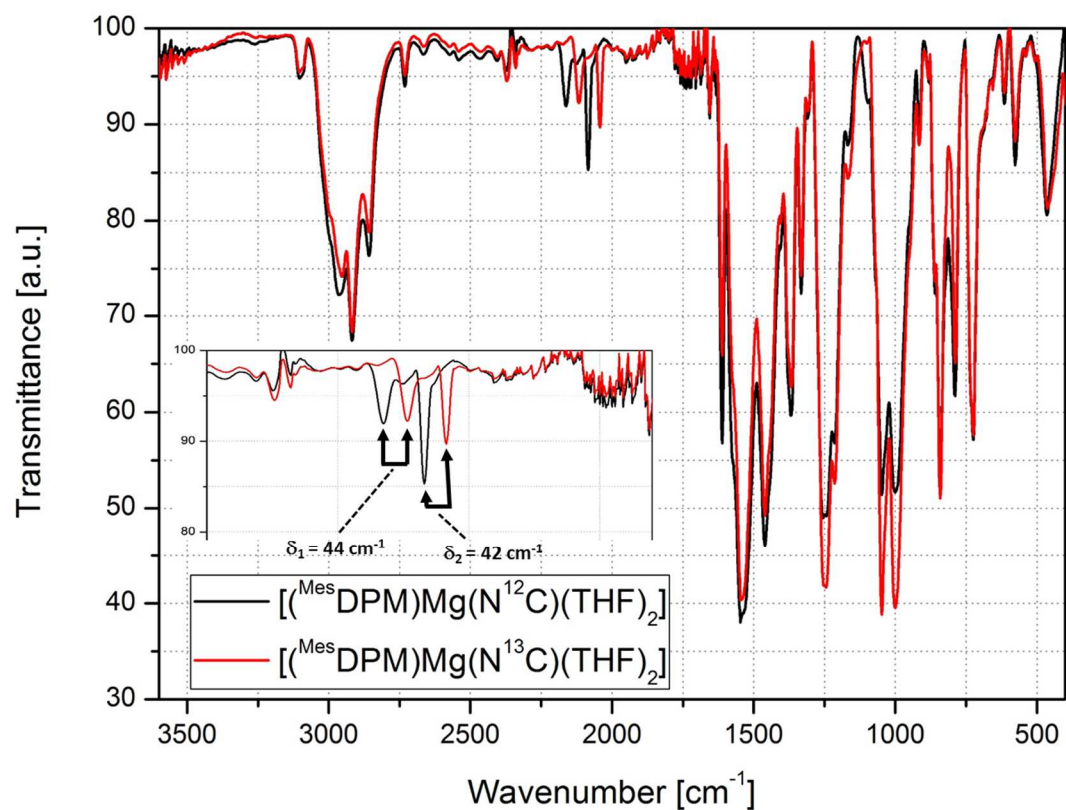

IR vibrational spectra, shown in **Figure S18 – S21**, were recorded on a Bruker Alpha II Platinum ATR.

**Figure S18.** IR vibrational spectrum of  $(^{\text{Mes}}\text{DPM})\text{MgN}^{12}\text{C}(\text{THF})_2$ .

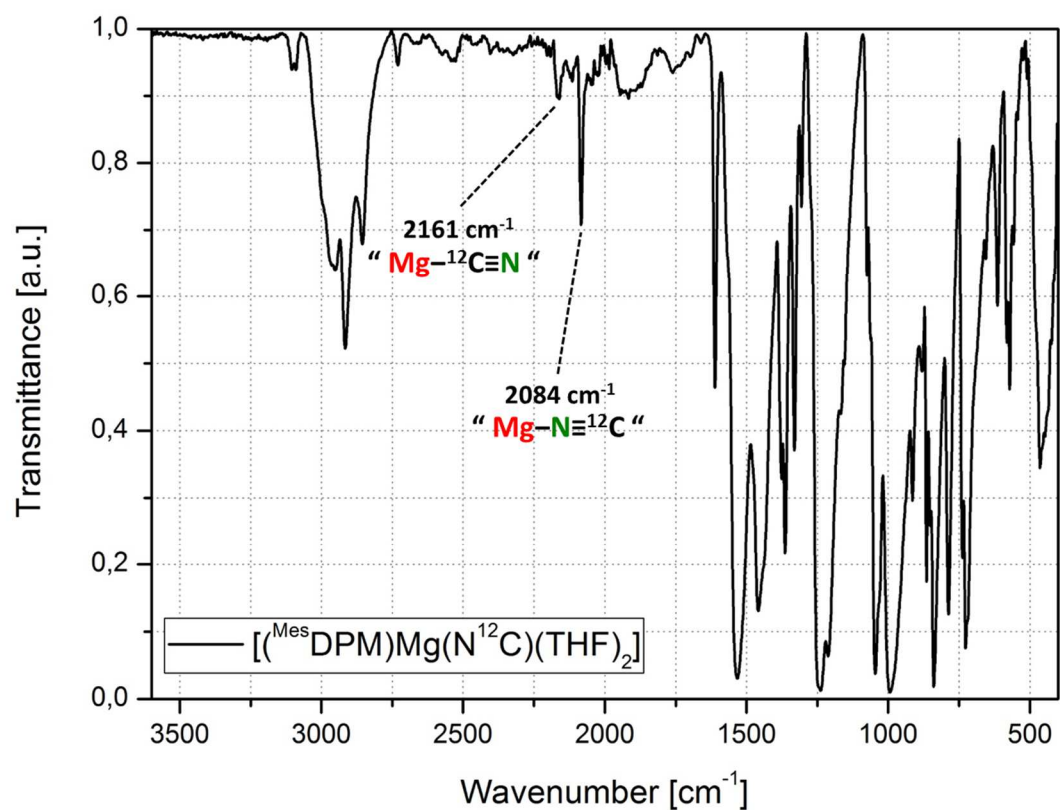

Figure S19. IR vibrational spectrum of  $(^{\text{Mes}}\text{DPM})\text{MgN}^{13}\text{C}(\text{THF})_2$ .

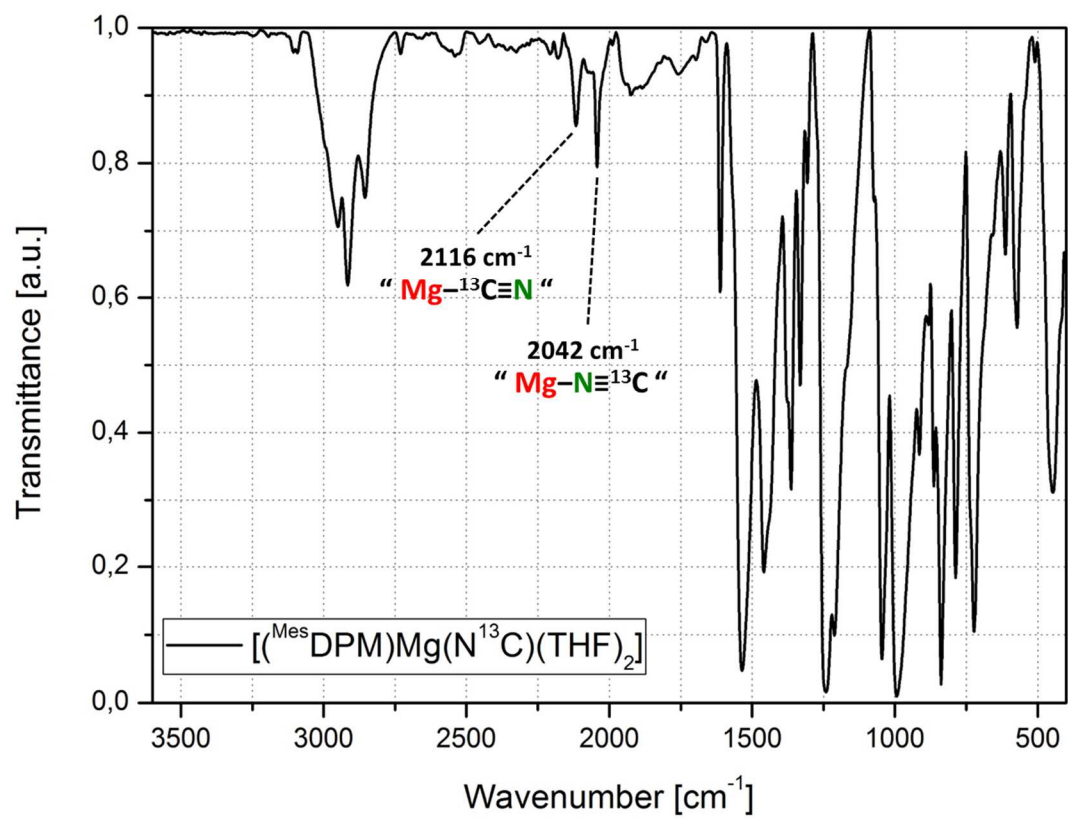

**Figure S20.** Superimposed (top left) and stacked (top right) IR vibrational spectra of  $(^{Mes}DPM)MgN^{12}C(THF)_2$  from 30°C to 70°C and superimposed (bottom left) and stacked (bottom right) IR vibrational spectra of  $(^{Mes}DPM)MgN^{12}C(THF)_2$  upon cooling from 70°C to 30°C.

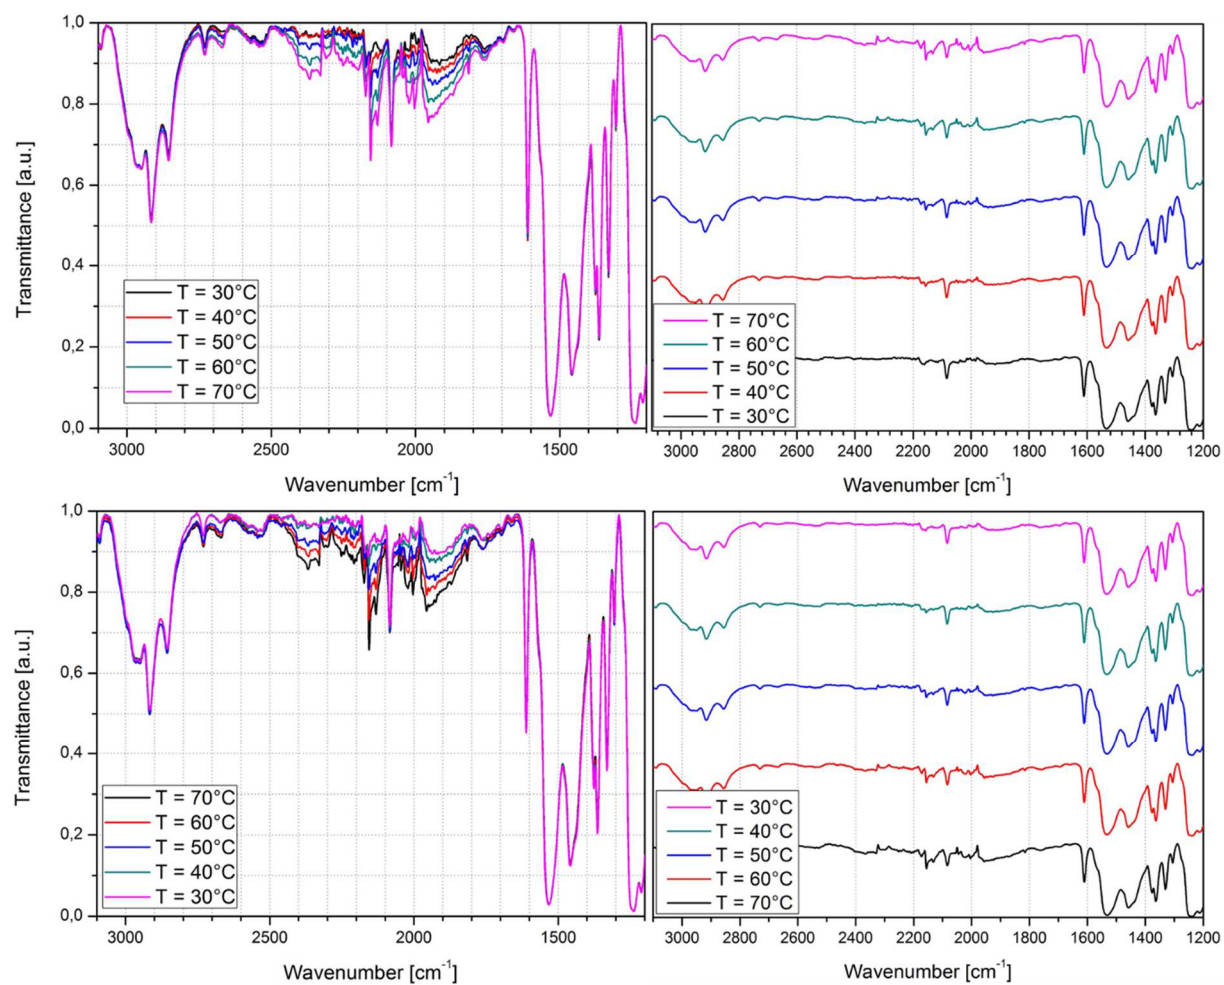



**Figure S21.** Superimposed (top left) and stacked (top right) IR vibrational spectra of  $^{13}\text{C}$ -labeled ( $^{\text{Mes}}\text{DPM}$ ) $\text{MgN}^{13}\text{C}(\text{THF})_2$  from 30°C to 70°C and superimposed (bottom left) and stacked (bottom right) IR vibrational spectra of  $^{13}\text{C}$ -labeled ( $^{\text{Mes}}\text{DPM}$ ) $\text{MgN}^{13}\text{C}(\text{THF})_2$  upon cooling from 70°C to 30°C.

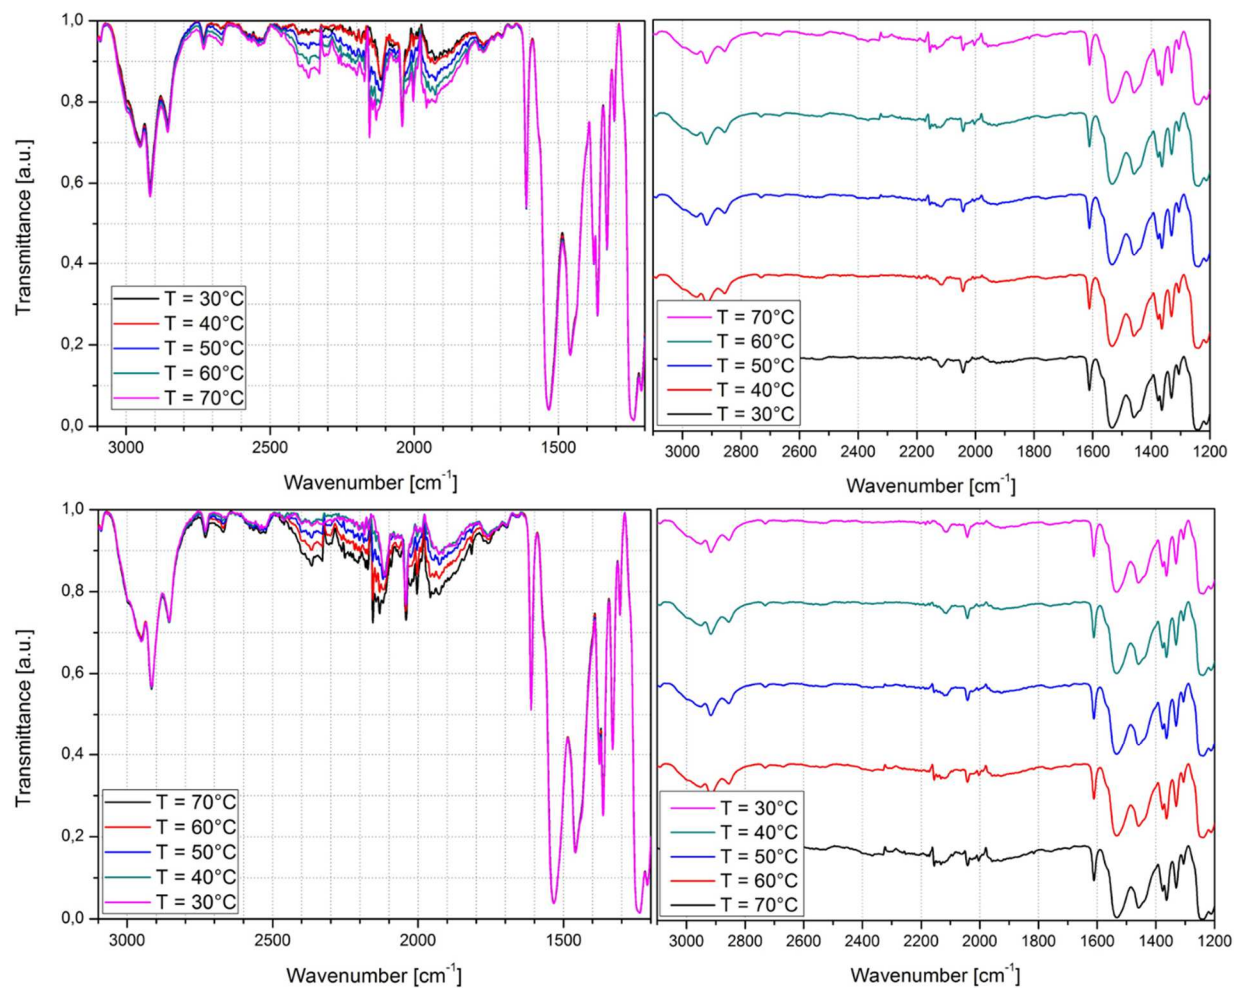

### Theoretical prediction of IR signals of $(^{Mes}DPM)MgN^{12}C(THF)_2$ and $(^{Mes}DPM)MgN^{13}C(THF)_2$

In accordance with Hooke's law,<sup>[11]</sup>

$$v_{max} = \frac{1}{2\pi c} \sqrt{\frac{k}{\mu}}$$

where  $c$  = speed of light,  $k$  = force constant,  $\mu = \frac{m_1 m_2}{m_1 + m_2}$  reduced mass.

given the mass of  $^{12}C = 12.011$  u,  $^{13}C = 13.003$  u and  $^{14}N = 14.007$  u

In the case of  $^{12}C$ - $^{14}N$  stretch for  $(^{Mes}DPM)MgN^{12}C(THF)_2$ :

$$v_{max} = \frac{1}{2\pi c} \sqrt{\frac{k}{\mu}} = \frac{1}{2\pi c} \sqrt{k} \sqrt{\frac{m_1 + m_2}{m_1 m_2}}$$

$$2085 = \frac{1}{2\pi c} \sqrt{k} \sqrt{\frac{m_1 + m_2}{m_1 m_2}} = \frac{1}{2\pi c} \sqrt{k} \sqrt{\frac{12.011 + 14.007}{12.011 \times 14.007}} = \frac{1}{2\pi c} \sqrt{k} \cdot 0.393$$

$$\frac{1}{2\pi c} \sqrt{k} = 5302$$

In the case of  $^{13}C$ - $^{14}N$  stretch of  $(^{Mes}DPM)MgN^{13}C(THF)_2$  for  $(^{Mes}DPM)MgN^{12}C(THF)_2$

assuming that the force constant is similar in both  $(^{Mes}DPM)MgN^{12}C(THF)_2$  and  $(^{Mes}DPM)MgN^{13}C(THF)_2$

$$v_{max} = \frac{1}{2\pi c} \sqrt{\frac{k}{\mu}} = \frac{1}{2\pi c} \sqrt{k} \sqrt{\frac{m_1 + m_2}{m_1 m_2}}$$

$$v_{max} = \frac{1}{2\pi c} \sqrt{k} \sqrt{\frac{13.003 + 14.007}{13.003 \times 14.007}} = 5302 \sqrt{\frac{13.003 + 14.007}{13.003 \times 14.007}} = 2042$$

Theoretical  $v_{max}$  for  $^{13}C$ - $^{14}N$  stretch of  $(^{Mes}DPM)MgN^{13}C(THF)_2$  calculated from  $(^{Mes}DPM)MgN^{12}C(THF)_2$  is  $2042 \text{ cm}^{-1}$ .

Experimental  $v_{max}$  was found to be  $2042 \text{ cm}^{-1}$  (ATR),  $2043 \text{ cm}^{-1}$  (KBr).

Analogous for  $(^{Mes}DPM)Mg^{12}CN(THF)_2$  and  $(^{Mes}DPM)Mg^{13}CN(THF)_2$ :

$$v_{max} = \frac{1}{2\pi c} \sqrt{\frac{k}{\mu}} = \frac{1}{2\pi c} \sqrt{k} \sqrt{\frac{m_1 + m_2}{m_1 m_2}}$$

$$2161 = \frac{1}{2\pi c} \sqrt{k} \sqrt{\frac{m_1 + m_2}{m_1 m_2}} = \frac{1}{2\pi c} \sqrt{k} \sqrt{\frac{12.011 + 14.007}{12.011 \times 14.007}} = \frac{1}{2\pi c} \sqrt{k} \cdot 0.393$$

$$\frac{1}{2\pi c} \sqrt{k} = 5541$$

$$v_{max} = \frac{1}{2\pi c} \sqrt{k} \sqrt{\frac{13.003+14.007}{13.003 \times 14.007}} = 5541 \sqrt{\frac{13.003+14.007}{13.003 \times 14.007}} = 2134$$

Theoretical  $v_{max}$  for  $^{13}\text{C}$ - $^{14}\text{N}$  stretch of  $(^{\text{Mes}}\text{DPM})\text{Mg}^{13}\text{CN}(\text{THF})_2$  calculated from  $(^{\text{Mes}}\text{DPM})\text{Mg}^{12}\text{CN}(\text{THF})_2$  is  $2134 \text{ cm}^{-1}$ .

Experimental  $v_{max}$  was found to be  $2116 \text{ cm}^{-1}$  (ATR),  $2118 \text{ cm}^{-1}$  (KBr).

**Table S6.** Overview of experimental and calculated IR vibrational CN stretch signals.

| Compound                      | Experimentally found wavenumbers [ $\text{cm}^{-1}$ ] | Calculated wavenumbers using Hooke's law [ $\text{cm}^{-1}$ ] | Calculated wavenumbers by DFT [ $\text{cm}^{-1}$ ] <sup>a</sup> |
|-------------------------------|-------------------------------------------------------|---------------------------------------------------------------|-----------------------------------------------------------------|
| “ $\text{MgN}^{12}\text{C}$ ” | 2085 (KBr)                                            | ---                                                           | 2099                                                            |
|                               | 2084 (ATR)                                            |                                                               |                                                                 |
| “ $\text{Mg}^{12}\text{CN}$ ” | 2162 (KBr)                                            | ---                                                           | 2166                                                            |
|                               | 2161 (ATR)                                            |                                                               |                                                                 |
| “ $\text{MgN}^{13}\text{C}$ ” | 2043 (KBr)                                            | 2042                                                          | 2065                                                            |
|                               | 2042 (ATR)                                            |                                                               |                                                                 |
| “ $\text{Mg}^{13}\text{CN}$ ” | 2118 (KBr)                                            | 2134                                                          | 2127                                                            |
|                               | 2116 (ATR)                                            |                                                               |                                                                 |

<sup>a</sup> B3PW91/6-311+G(2df,p); correction factor 0.9686.<sup>[12]</sup>

## 5) Theoretical calculations

### General

All calculations were carried out using Gaussian 16A.<sup>[13]</sup> All methods were used as implemented. All structures were fully optimized on a B3PW91/6-311+G\*\* level.<sup>[14-17]</sup> Specific structures were also optimized using Grimme's third dispersion method with Becke-Johnson dampening (GD3BJ).<sup>[18]</sup> Frequency calculations were carried out on the respective levels of theory in order to characterize them as true minima (NIMAG=0) or transition states (NIMAG=1). Charges were calculated via NBO analysis.<sup>[19]</sup> For IR spectra, structures were fully optimized on a B3PW91/6-311+G(2df,p) level of theory. A frequency scaling factor of 0.9686, as determined by Radom *et al.* was used.<sup>[12]</sup> Molecules were drawn and evaluated using Molecule V2.3.<sup>[20]</sup>

QTAIM analysis was carried out using AIMAll V17. Wave functions were obtained from the optimizations.<sup>[21,22]</sup>

The following model system was used:  $(^{\text{Ph}}\text{DPM})\text{Mg}(\text{NC})\cdot(\text{THF})_2$

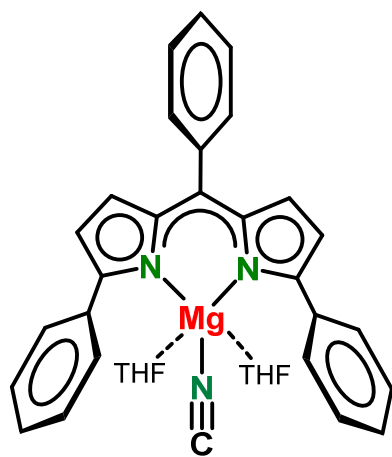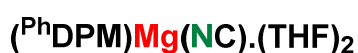

**Figure S22.** Chemical formula of used model system  $(^{\text{Ph}}\text{DPM})\text{Mg}(\text{NC})\cdot(\text{THF})_2$ .

### Energies

**Table S7.** Calculated enthalpies ( $\Delta H$ ).

| $\Delta H$ [kcal/mol]                                                    | B3PW91/6-311+G** | B3PW91(GD3BJ)/6-311+G** |
|--------------------------------------------------------------------------|------------------|-------------------------|
| $(^{\text{Ph}}\text{DPM})\text{Mg}(\text{THF})_2\text{-N}\equiv\text{C}$ | 0.00             | 0.00                    |
| TS Side on                                                               | +10.7            | +10.91                  |
| $(^{\text{Ph}}\text{DPM})\text{Mg}(\text{THF})_2\text{-C}\equiv\text{N}$ | +0.90            | +1.60                   |

**Table S8.** Calculated Gibbs free energies ( $\Delta G$ ) and entropies ( $\Delta S$ , in brackets).

| $\Delta G$ [kcal/mol]<br>( $\Delta S$ [cal/mol*K]) (298K) | B3PW91/6-311+G** | B3PW91(GD3BJ)/6-311+G** |
|-----------------------------------------------------------|------------------|-------------------------|
| ( <sup>Ph</sup> DPM)Mg(THF) <sub>2</sub> -N≡C             | 0.00 (0.00)      | 0.00 (0.00)             |
| TS Side on                                                | 12.21 (-4.93)    | 12.00 (-3.66)           |
| ( <sup>Ph</sup> DPM)Mg(THF) <sub>2</sub> -C≡N             | 0.83 (0.23)      | 1.63 (-0.08)            |

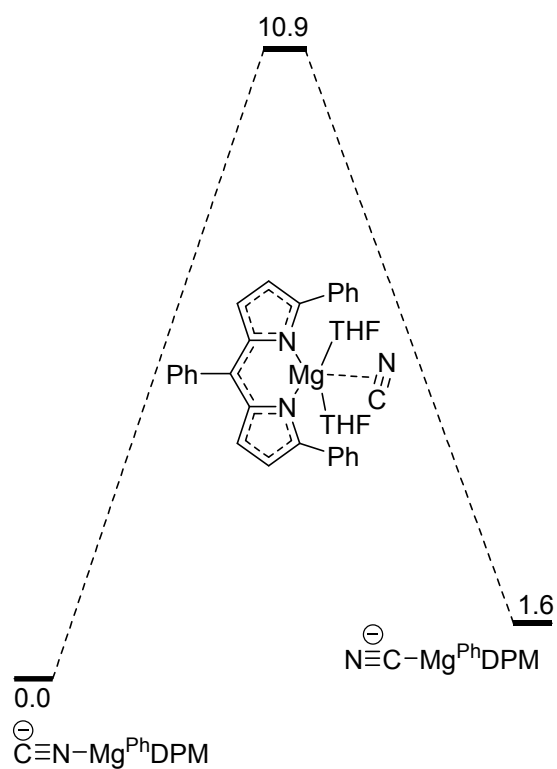

**Figure S23.** Energy diagram for NC/CN isomerization in (<sup>Ph</sup>DPM)Mg(NC)·(THF)<sub>2</sub>; B3PW91(GD3BJ)/6-311+G\*\*,  $\Delta H$  in kcal/mol.

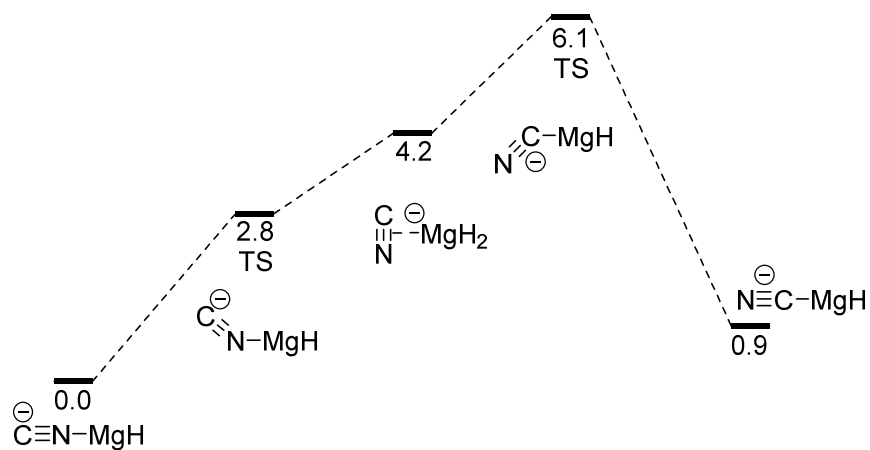

**Figure S24.** Energy diagram for NC/CN isomerization in H-Mg(NC) ; B3PW91/6-311+G\*\*,  $\Delta H$  in kcal/mol.

**Table S9.** Calculated  $\Delta H$ ,  $\Delta G$  and  $\Delta S$  for isomerization of H-Mg-N≡C to H-Mg-C≡N (B3PW91/6-311+G\*\*).

| Structure       | $\Delta H$ (gas phase)<br>kcal/mol | $\Delta G$ (gas phase)<br>kcal/mol | $\Delta S$ (gas phase)<br>cal/mol*K |
|-----------------|------------------------------------|------------------------------------|-------------------------------------|
| H-Mg-N≡C        | 0.00                               | 0.00                               | 0.00                                |
| TS H-Mg-N≡C     | 2.82                               | 0.07                               | 9.22                                |
| H-Mg NC Side on | 4.19                               | 0.92                               | 10.97                               |
| TS H-Mg-C≡N     | 6.13                               | 3.34                               | 9.34                                |
| H-Mg-C≡N        | 0.93                               | -1.03                              | 6.59                                |

## Charges and bond parameters

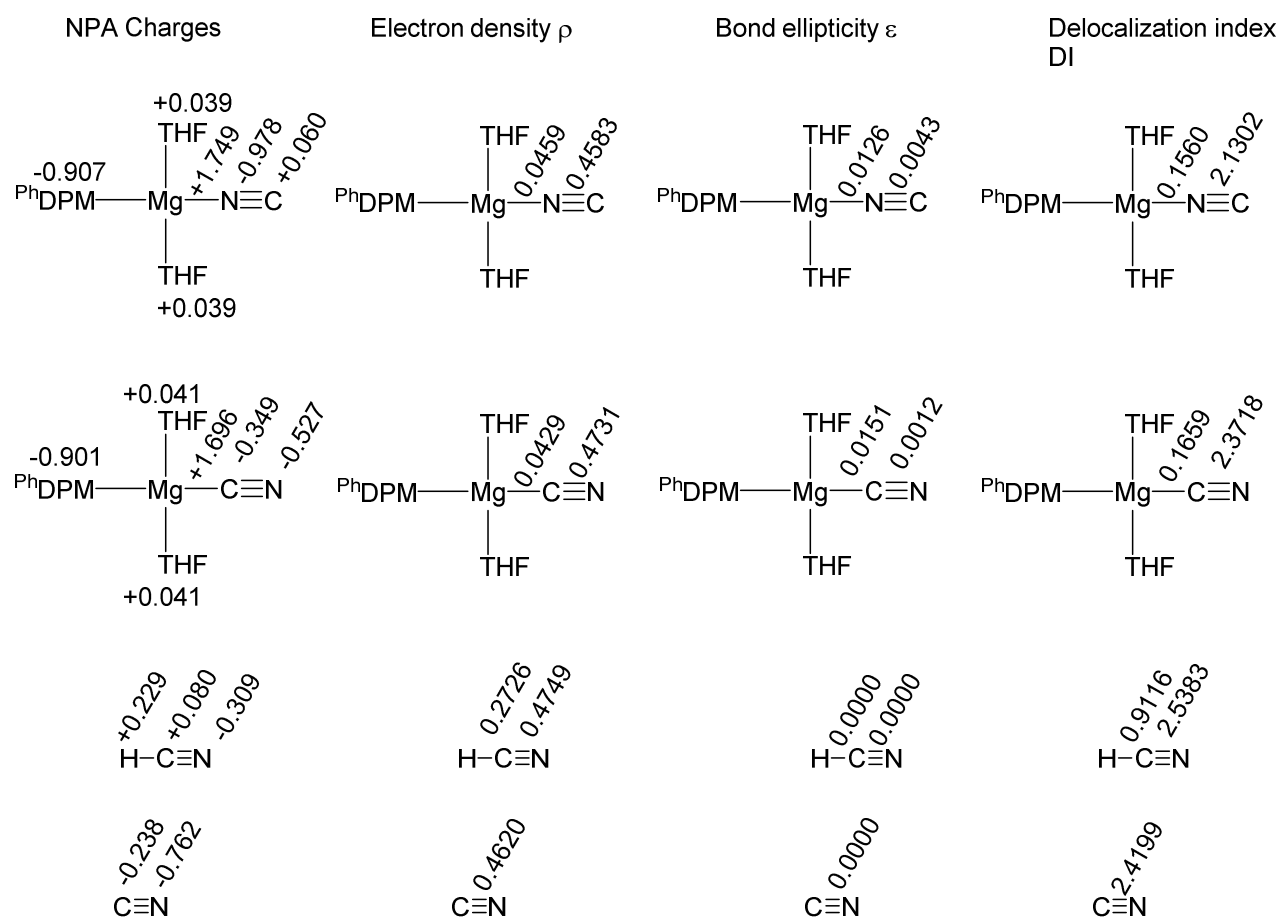

**Figure S25.** Selected charges and bond parameters. All charges and bond parameters were determined at the B3PW91/6-311+G\*\* level of theory.

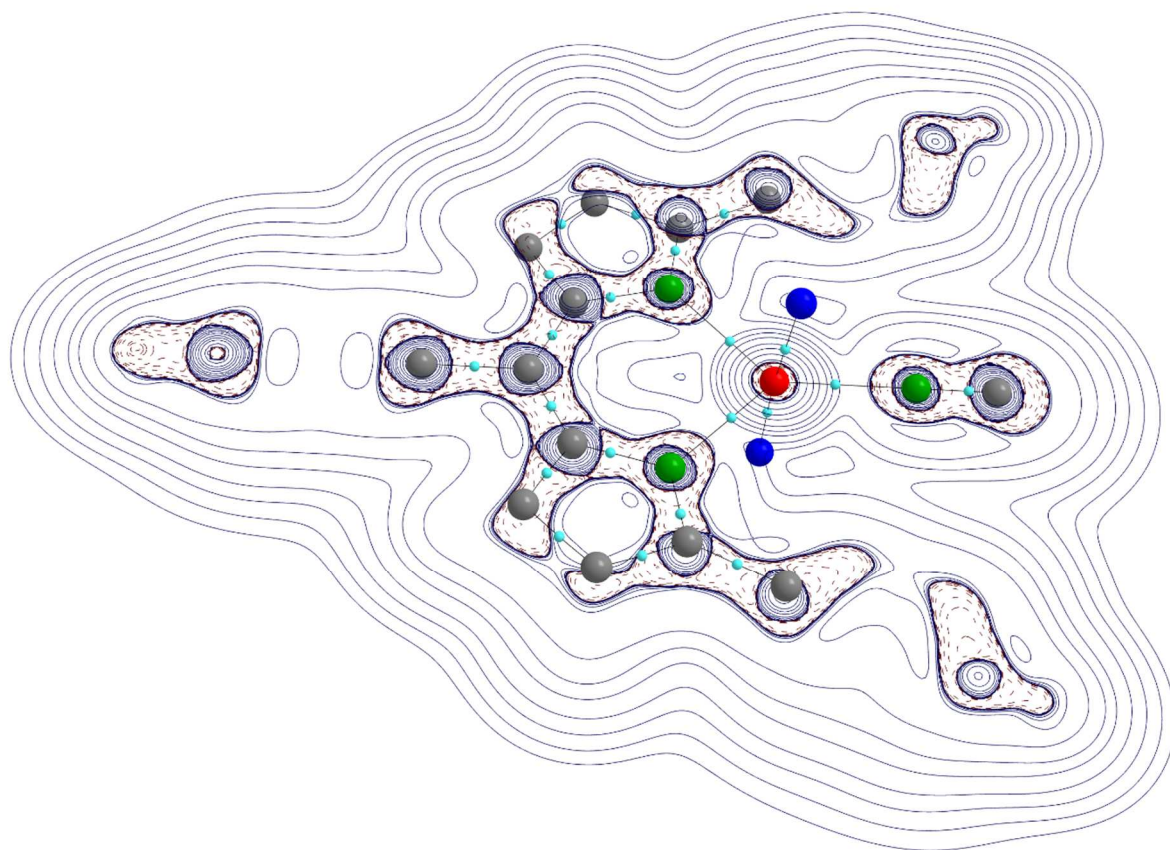

**Figure S26.** Laplacian of the electron density for  $(^{\text{Ph}}\text{DPM})\text{Mg}(\text{N}\equiv\text{C})\cdot(\text{THF})_2$ .

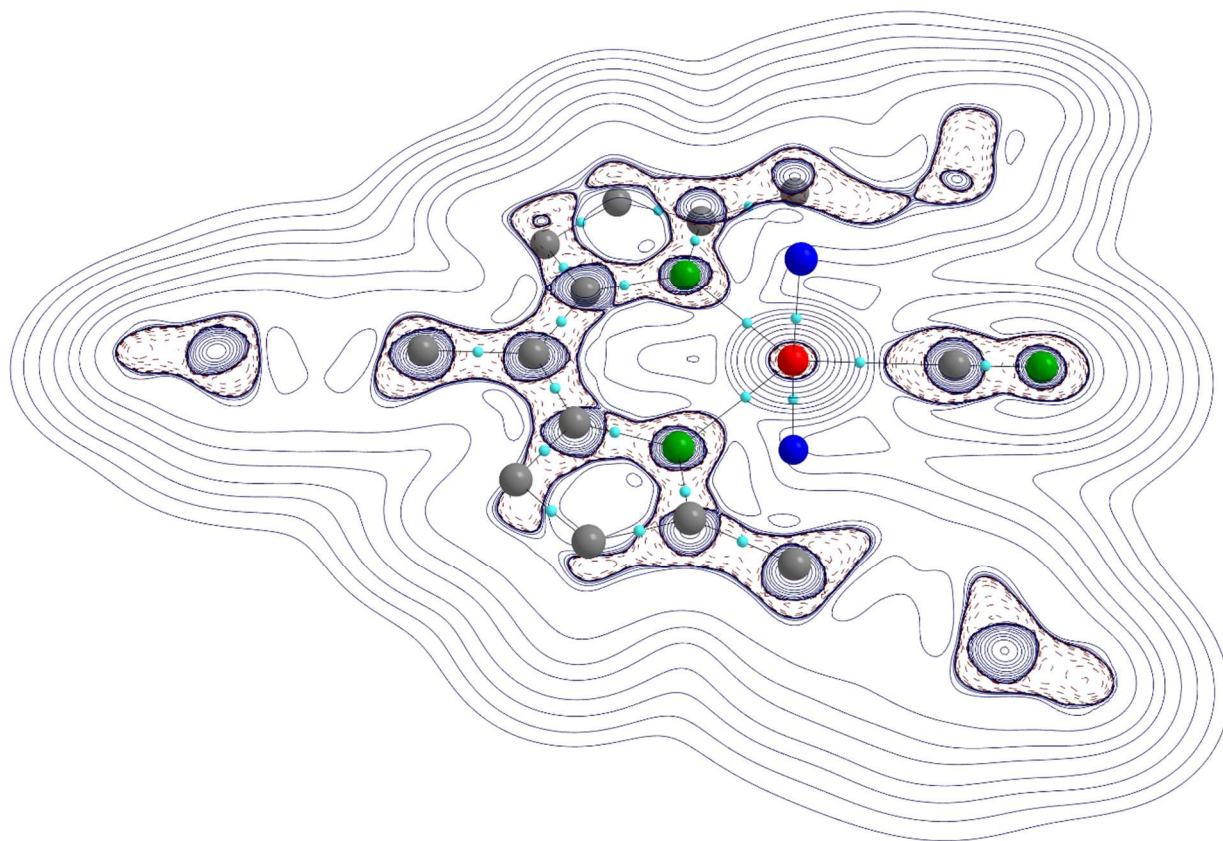

**Figure S27.** Laplacian of the electron density for  $(^{\text{Ph}}\text{DPM})\text{Mg}(\text{C}\equiv\text{N})\cdot(\text{THF})_2$ .



### Calculated IR spectra

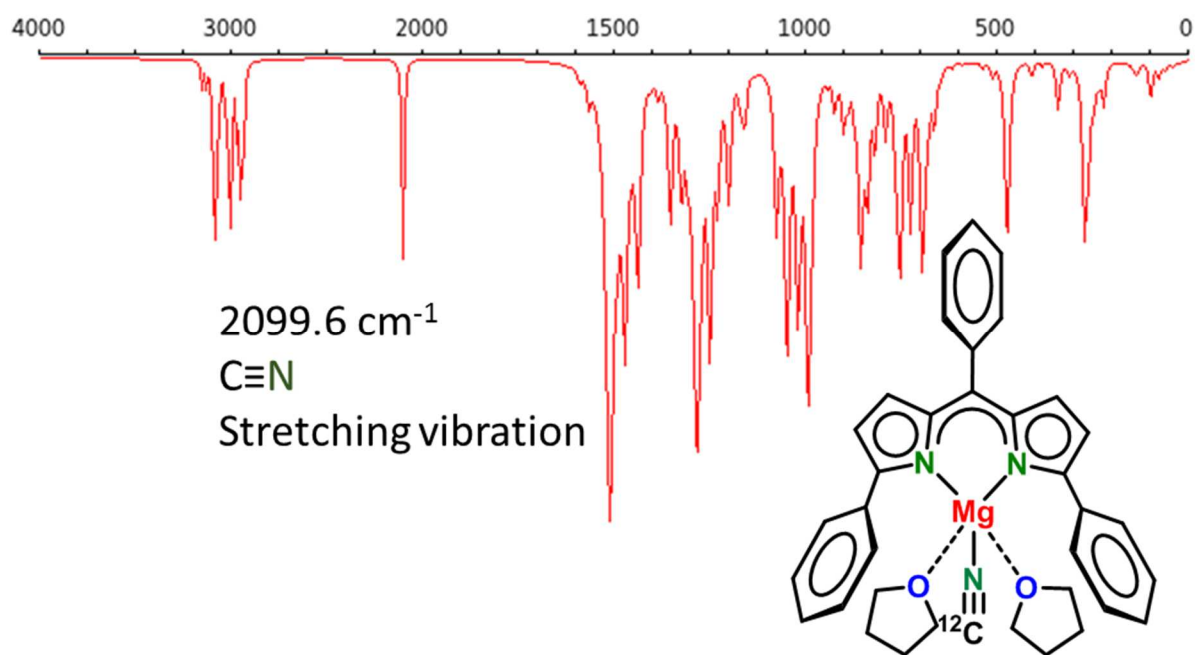

**Figure S28.** Calculated IR spectrum for  $(\text{PhDPM})\text{Mg}(\text{N}\equiv^{12}\text{C})\cdot(\text{THF})_2$ , B3PW91/6-311+G(2df,p).

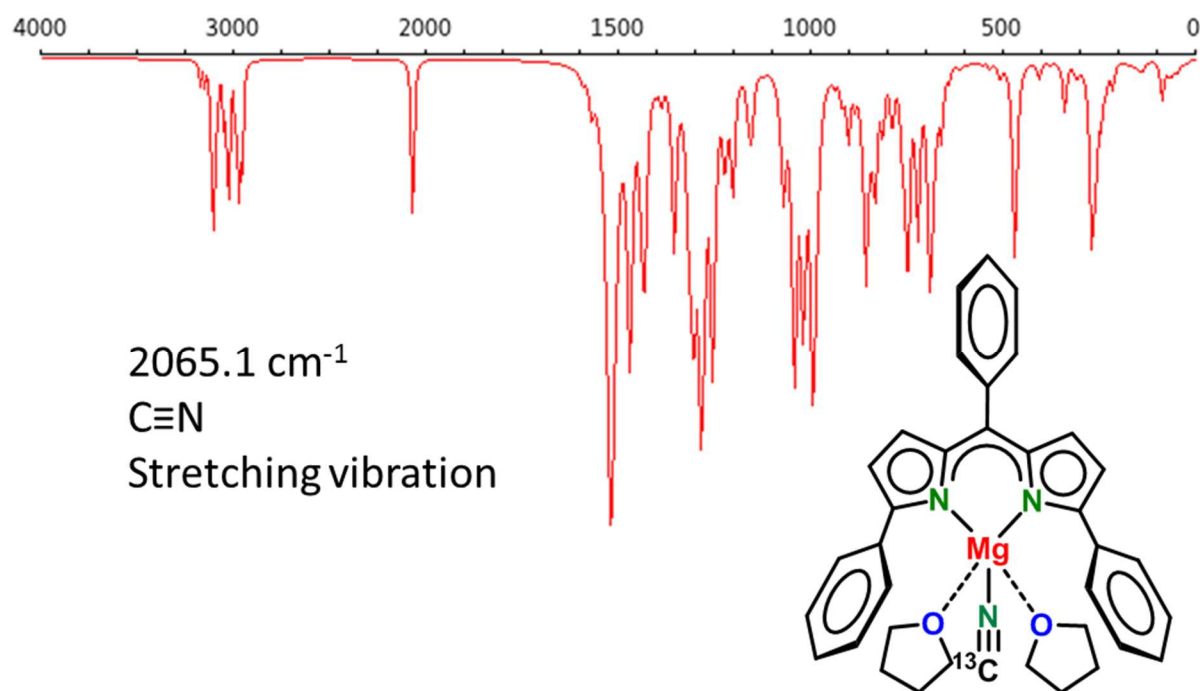

**Figure S29.** Calculated IR spectrum for  $(\text{PhDPM})\text{Mg}(\text{N}\equiv^{13}\text{C})\cdot(\text{THF})_2$ , B3PW91/6-311+G(2df,p).

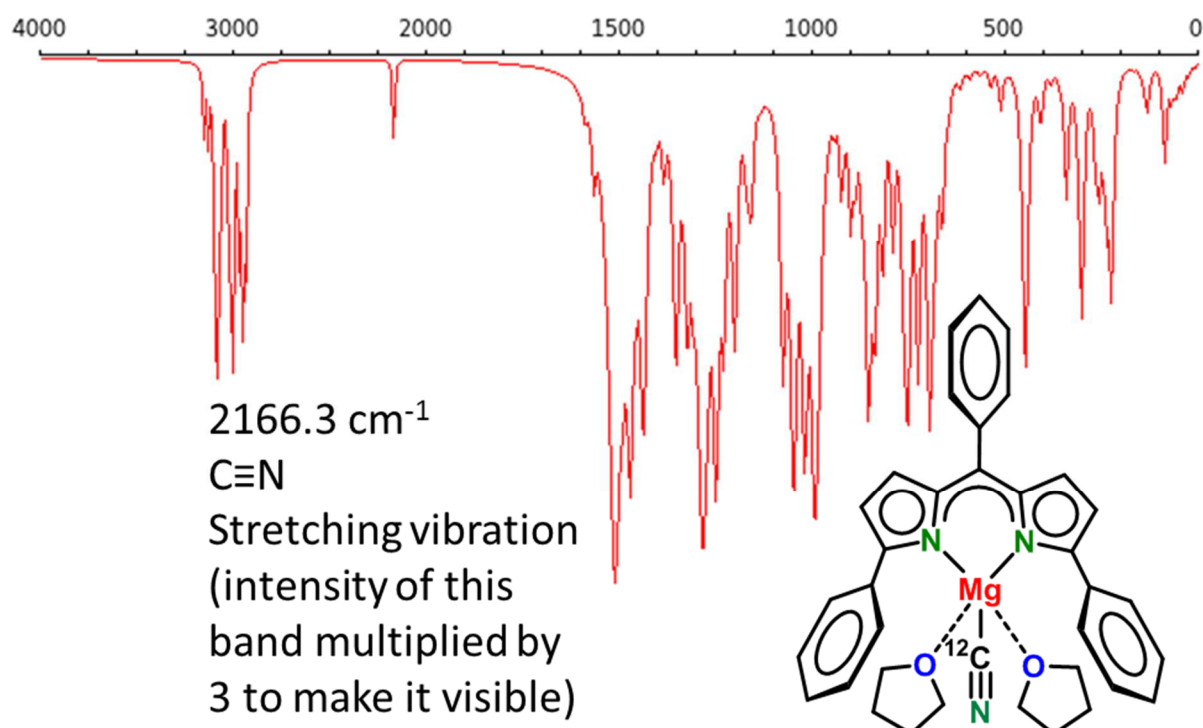

**Figure S30.** Calculated IR spectrum for (<sup>Ph</sup>DPM)Mg(<sup>12</sup>C≡N)·(THF)<sub>2</sub>, B3PW91/6-311+G(2df,p).

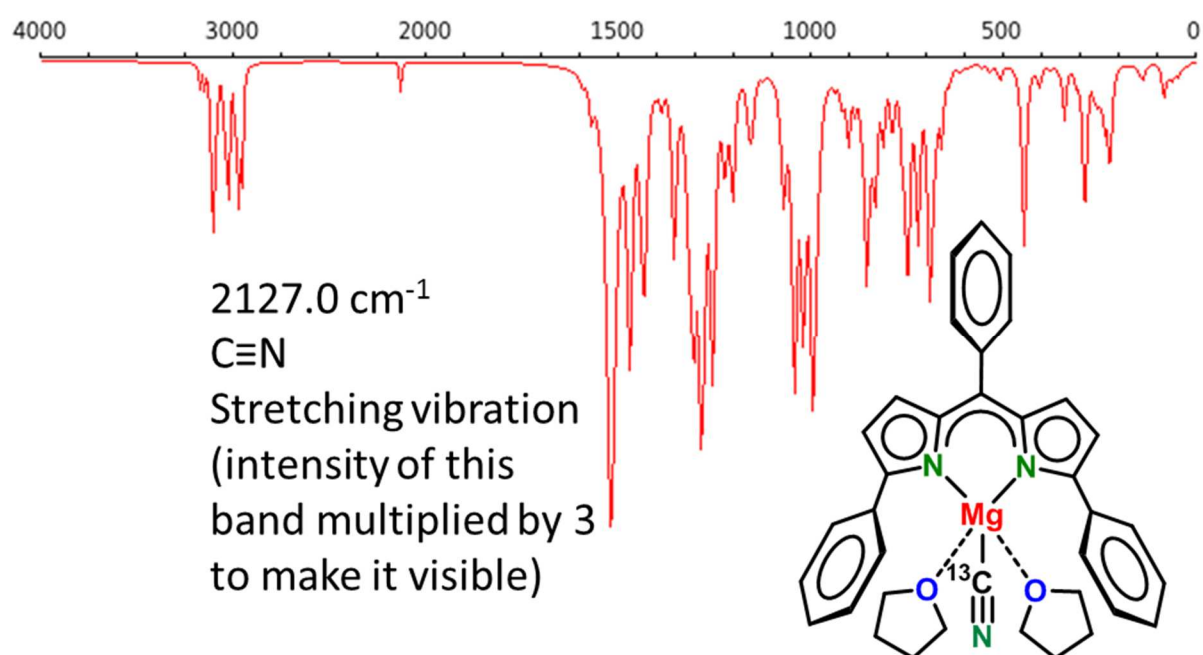

**Figure S31.** Calculated IR spectrum for (<sup>Ph</sup>DPM)Mg(<sup>13</sup>C≡N)·(THF)<sub>2</sub>, B3PW91/6-311+G(2df,p).

## XYZ coordinates

|             | 77        |                         |           |
|-------------|-----------|-------------------------|-----------|
| LMg(THF)2CN |           | B3PW91(GD3BJ)/6-311+G** |           |
| Mg          | 1.028502  | -0.058653               | 0.070209  |
| O           | 0.937818  | -0.856235               | 2.045400  |
| O           | 1.230308  | 0.763785                | -1.877628 |
| N           | -0.390835 | 1.444418                | 0.505258  |
| N           | -0.519862 | -1.378283               | -0.504265 |
| N           | 4.336219  | -0.320212               | 0.214234  |
| C           | -1.754359 | 1.332305                | 0.264932  |
| C           | -0.130098 | 2.751607                | 0.678119  |
| C           | 0.888581  | -3.345536               | -0.924187 |
| C           | -0.403236 | -2.702589               | -0.704688 |
| C           | -2.435166 | 0.142353                | -0.043973 |
| C           | -1.873308 | -1.114783               | -0.324539 |
| C           | 1.945241  | -2.655343               | -1.528937 |
| C           | 1.221763  | 3.242095                | 0.926647  |
| C           | -3.917452 | 0.224500                | -0.079049 |
| C           | -2.338167 | 2.637201                | 0.300627  |
| H           | -3.381616 | 2.862918                | 0.141361  |
| C           | 3.196451  | -3.243712               | -1.651464 |
| H           | 4.012686  | -2.674470               | -2.079931 |
| C           | -1.316659 | 3.527376                | 0.546411  |
| H           | -1.391241 | 4.599364                | 0.656303  |
| C           | 2.166823  | 2.449252                | 1.588032  |
| C           | -4.618561 | -0.092330               | -1.245630 |
| C           | 3.404934  | -4.541887               | -1.199584 |
| C           | -4.631287 | 0.621712                | 1.054767  |
| C           | 0.074919  | 0.985018                | -2.718905 |
| H           | -0.748051 | 1.321197                | -2.083287 |
| H           | -0.195393 | 0.031669                | -3.175733 |
| C           | 1.613904  | 4.502115                | 0.452643  |
| C           | -1.675589 | -3.339321               | -0.643927 |
| H           | -1.866856 | -4.392517               | -0.788607 |
| C           | 1.105276  | -4.660124               | -0.486725 |
| C           | 2.352169  | -5.251905               | -0.624933 |
| H           | 2.509919  | -6.264751               | -0.269296 |
| C           | -2.598664 | -2.343663               | -0.416951 |
| H           | -3.667372 | -2.451354               | -0.310858 |
| C           | -0.288636 | -0.834137               | 2.813333  |
| H           | -1.124130 | -0.853423               | 2.111232  |
| H           | -0.319355 | 0.099869                | 3.377457  |
| C           | 2.922436  | 4.936505                | 0.606005  |
| H           | 3.215797  | 5.907640                | 0.221175  |
| C           | 1.664149  | -2.081035               | 2.312438  |
| H           | 2.449737  | -1.863983               | 3.043147  |
| H           | 2.134523  | -2.404526               | 1.384659  |
| C           | 3.863054  | 4.120751                | 1.232669  |

|   |           |           |           |
|---|-----------|-----------|-----------|
| C | 3.480161  | 2.877895  | 1.724790  |
| H | 4.205722  | 2.225317  | 2.195439  |
| C | -6.005197 | -0.007130 | -1.279209 |
| H | -6.537365 | -0.243616 | -2.194443 |
| C | 0.616253  | -3.029284 | 2.857719  |
| H | 1.053154  | -3.841253 | 3.441657  |
| H | 0.039921  | -3.460584 | 2.034460  |
| C | 1.512940  | 2.858491  | -2.898188 |
| H | 2.184731  | 3.461269  | -3.511774 |
| H | 1.004957  | 3.517830  | -2.189013 |
| C | -6.018858 | 0.692238  | 1.024857  |
| H | -6.562451 | 0.989777  | 1.915226  |
| C | -6.708893 | 0.381455  | -0.143095 |
| C | -0.256502 | -2.084015 | 3.682881  |
| H | -1.258738 | -2.472818 | 3.871523  |
| H | 0.216449  | -1.874516 | 4.647099  |
| C | 2.245749  | 1.762689  | -2.149893 |
| H | 3.029120  | 1.296064  | -2.754635 |
| H | 2.680108  | 2.074386  | -1.200842 |
| C | 3.177148  | -0.238746 | 0.162134  |
| C | 0.493842  | 2.059555  | -3.709985 |
| H | -0.355657 | 2.655474  | -4.048460 |
| H | 0.971015  | 1.612831  | -4.587654 |
| H | -4.088091 | 0.864124  | 1.961388  |
| H | -7.791655 | 0.442262  | -0.167978 |
| H | -4.064907 | -0.394753 | -2.127538 |
| H | 4.890942  | 4.452006  | 1.332370  |
| H | 0.892517  | 5.125355  | -0.064974 |
| H | 1.874678  | 1.490910  | 2.003522  |
| H | 4.385038  | -4.997736 | -1.287947 |
| H | 1.788031  | -1.651653 | -1.907955 |
| H | 0.297170  | -5.203770 | -0.009202 |

77

| LMg(THF)2NC | B3PW91(GD3BJ)/6-311+G** |           |           |
|-------------|-------------------------|-----------|-----------|
| Mg          | -1.024798               | -0.000001 | -0.000001 |
| O           | -1.097327               | -0.841750 | -1.940626 |
| O           | -1.097333               | 0.841747  | 1.940622  |
| N           | 0.461039                | 1.408219  | -0.517727 |
| N           | 0.461042                | -1.408217 | 0.517727  |
| N           | -3.063331               | -0.000006 | -0.000003 |
| C           | 1.822498                | 1.220896  | -0.310983 |
| C           | 0.272431                | 2.725576  | -0.708809 |
| C           | -1.051615               | -3.294905 | 0.937890  |
| C           | 0.272439                | -2.725575 | 0.708809  |
| C           | 2.444637                | 0.000004  | 0.000001  |
| C           | 1.822501                | -1.220889 | 0.310985  |
| C           | -2.061260               | -2.550710 | 1.558251  |
| C           | -1.051624               | 3.294903  | -0.937891 |

|   |           |           |           |
|---|-----------|-----------|-----------|
| C | 3.929646  | 0.000006  | 0.000002  |
| C | 2.479384  | 2.488856  | -0.385463 |
| H | 3.538020  | 2.655952  | -0.257444 |
| C | -3.343642 | -3.066509 | 1.686065  |
| H | -4.121214 | -2.454867 | 2.128010  |
| C | 1.505304  | 3.432543  | -0.622127 |
| H | 1.639232  | 4.496058  | -0.755296 |
| C | -2.061267 | 2.550704  | -1.558253 |
| C | 4.638439  | -0.340111 | 1.155311  |
| C | -3.631365 | -4.345683 | 1.223725  |
| C | 4.638439  | 0.340125  | -1.155307 |
| C | 0.099177  | 0.982343  | 2.740490  |
| H | 0.927892  | 1.226844  | 2.071516  |
| H | 0.299035  | 0.021876  | 3.218220  |
| C | -1.348166 | 4.590778  | -0.490759 |
| C | 1.505314  | -3.432537 | 0.622129  |
| H | 1.639245  | -4.496052 | 0.755299  |
| C | -1.348151 | -4.590783 | 0.490760  |
| C | -2.626123 | -5.110320 | 0.633772  |
| H | -2.845260 | -6.108945 | 0.270500  |
| C | 2.479392  | -2.488847 | 0.385465  |
| H | 3.538028  | -2.655940 | 0.257447  |
| C | 0.099186  | -0.982340 | -2.740492 |
| H | 0.927901  | -1.226834 | -2.071517 |
| H | 0.299037  | -0.021873 | -3.218224 |
| C | -2.626139 | 5.110311  | -0.633771 |
| H | -2.845280 | 6.108934  | -0.270498 |
| C | -2.013765 | -1.931844 | -2.217061 |
| H | -2.811656 | -1.549953 | -2.860869 |
| H | -2.453559 | -2.252965 | -1.274287 |
| C | -3.631378 | 4.345671  | -1.223725 |
| C | -3.343650 | 3.066498  | -1.686067 |
| H | -4.121220 | 2.454854  | -2.128013 |
| C | 6.028106  | -0.332746 | 1.157043  |
| H | 6.566988  | -0.586447 | 2.063704  |
| C | -1.163746 | -2.979377 | -2.907860 |
| H | -1.759396 | -3.655122 | -3.524113 |
| H | -0.624861 | -3.572361 | -2.163571 |
| C | -1.163766 | 2.979372  | 2.907861  |
| H | -1.759421 | 3.655112  | 3.524115  |
| H | -0.624884 | 3.572361  | 2.163574  |
| C | 6.028106  | 0.332764  | -1.157038 |
| H | 6.566988  | 0.586466  | -2.063698 |
| C | 6.726258  | 0.000010  | 0.000003  |
| C | -0.190618 | -2.116950 | -3.710844 |
| H | 0.718756  | -2.644807 | -4.003637 |
| H | -0.674426 | -1.738698 | -4.616605 |
| C | -2.013778 | 1.931836  | 2.217058  |
| H | -2.811668 | 1.549939  | 2.860863  |

|   |           |           |           |
|---|-----------|-----------|-----------|
| H | -2.453572 | 2.252957  | 1.274283  |
| C | -4.235535 | -0.000008 | -0.000004 |
| C | -0.190635 | 2.116949  | 3.710844  |
| H | 0.718736  | 2.644811  | 4.003640  |
| H | -0.674442 | 1.738692  | 4.616604  |
| H | 4.089025  | 0.599316  | -2.053489 |
| H | 7.811015  | 0.000011  | 0.000003  |
| H | 4.089025  | -0.599304 | 2.053492  |
| H | -4.635477 | 4.744859  | -1.317017 |
| H | -0.576378 | 5.176294  | -0.002724 |
| H | -1.845497 | 1.561226  | -1.945815 |
| H | -4.635463 | -4.744875 | 1.317017  |
| H | -1.845494 | -1.561231 | 1.945812  |
| H | -0.576361 | -5.176296 | 0.002726  |

77

| LMg(THF)2NC | B3PW91/6-311+G** |           |           |
|-------------|------------------|-----------|-----------|
| Mg          | 0.996986         | 0.001518  | -0.001665 |
| O           | 1.102446         | -0.494195 | 2.121274  |
| O           | 1.093321         | 0.495314  | -2.125701 |
| N           | -0.469025        | 1.502150  | 0.299336  |
| N           | -0.466224        | -1.502763 | -0.297695 |
| N           | 3.039462         | 0.005880  | -0.005442 |
| C           | -1.829846        | 1.258463  | 0.139381  |
| C           | -0.324303        | 2.838442  | 0.362801  |
| C           | 0.968523         | -3.509928 | -0.559693 |
| C           | -0.318527        | -2.838767 | -0.360610 |
| C           | -2.440991        | -0.002440 | 0.002082  |
| C           | -1.827323        | -1.262064 | -0.135963 |
| C           | 2.008019         | -2.912998 | -1.283248 |
| C           | 0.961390         | 3.512547  | 0.560718  |
| C           | -3.935267        | -0.004080 | 0.003138  |
| C           | -2.524465        | 2.506041  | 0.102220  |
| H           | -3.590137        | 2.630669  | -0.015976 |
| C           | 3.221472         | -3.567379 | -1.456316 |
| H           | 4.019690         | -3.076198 | -2.001888 |
| C           | -1.580329        | 3.494405  | 0.232631  |
| H           | -1.747808        | 4.560896  | 0.272478  |
| C           | 2.003037         | 2.917817  | 1.282979  |
| C           | -4.647845        | -0.380718 | -1.139396 |
| C           | 3.414972         | -4.838538 | -0.925817 |
| C           | -4.647060        | 0.370956  | 1.146689  |
| C           | -0.063982        | 0.509858  | -2.989570 |
| H           | -0.765761        | 1.265762  | -2.620307 |
| H           | -0.536634        | -0.471511 | -2.928606 |
| C           | 1.165450         | 4.797724  | 0.033098  |
| C           | -1.572882        | -3.497484 | -0.228403 |
| H           | -1.738026        | -4.564372 | -0.267408 |
| C           | 1.176236         | -4.794384 | -0.031738 |

|   |           |           |           |
|---|-----------|-----------|-----------|
| C | 2.385155  | -5.451164 | -0.214490 |
| H | 2.529033  | -6.440806 | 0.207516  |
| C | -2.519086 | -2.511160 | -0.097247 |
| H | -3.584306 | -2.638127 | 0.022532  |
| C | -0.053376 | -0.518578 | 2.986975  |
| H | -0.749915 | -1.279315 | 2.617773  |
| H | -0.533564 | 0.459261  | 2.927971  |
| C | 2.372945  | 5.457368  | 0.214937  |
| H | 2.514025  | 6.447514  | -0.206829 |
| C | 2.219783  | -1.168418 | 2.761380  |
| H | 2.978476  | -0.415953 | 2.992053  |
| H | 2.646616  | -1.875833 | 2.051195  |
| C | 3.404910  | 4.846969  | 0.925056  |
| C | 3.215018  | 3.575127  | 1.455206  |
| H | 4.014994  | 3.085727  | 1.999803  |
| C | -6.038868 | -0.374774 | -1.140801 |
| H | -6.577110 | -0.658720 | -2.039406 |
| C | 1.640328  | -1.810968 | 4.013533  |
| H | 2.384128  | -1.899851 | 4.807979  |
| H | 1.260359  | -2.812689 | 3.790583  |
| C | 1.617689  | 1.814548  | -4.020183 |
| H | 2.359743  | 1.908331  | -4.815697 |
| H | 1.229782  | 2.813459  | -3.798287 |
| C | -6.038062 | 0.361924  | 1.150064  |
| H | -6.575657 | 0.644666  | 2.049435  |
| C | -6.738032 | -0.007199 | 0.005126  |
| C | 0.486122  | -0.870730 | 4.363342  |
| H | -0.272730 | -1.331840 | 4.999051  |
| H | 0.858526  | 0.025077  | 4.870368  |
| C | 2.204006  | 1.178642  | -2.767784 |
| H | 2.969112  | 0.432625  | -2.998063 |
| H | 2.625178  | 1.890853  | -2.058969 |
| C | 4.212818  | 0.007768  | -0.008268 |
| C | 0.470763  | 0.864415  | -4.367150 |
| H | -0.292650 | 1.318407  | -5.002526 |
| H | 0.849798  | -0.029074 | -4.873351 |
| H | -4.102331 | 0.662443  | 2.038490  |
| H | -7.823171 | -0.008403 | 0.005896  |
| H | -4.103737 | -0.671023 | -2.031961 |
| H | 4.352240  | 5.358528  | 1.059990  |
| H | 0.375489  | 5.271134  | -0.540656 |
| H | 1.861439  | 1.939197  | 1.727841  |
| H | 4.363411  | -5.347853 | -1.061456 |
| H | 1.863692  | -1.935004 | -1.728621 |
| H | 0.387995  | -5.269477 | 0.542988  |

77

LMg(THF)2CN

B3PW91/6-311+G\*\*

|    |           |           |          |
|----|-----------|-----------|----------|
| Mg | -0.991154 | -0.000055 | 0.000028 |
|----|-----------|-----------|----------|

|   |           |           |           |
|---|-----------|-----------|-----------|
| O | -1.082597 | 0.514782  | 2.130089  |
| O | -1.082733 | -0.514738 | -2.130086 |
| N | 0.477612  | -1.498001 | 0.309398  |
| N | 0.477526  | 1.497972  | -0.309432 |
| N | -4.321219 | -0.000004 | 0.000094  |
| C | 1.838399  | -1.259169 | 0.143625  |
| C | 0.328798  | -2.833392 | 0.377403  |
| C | -0.959982 | 3.499947  | -0.581828 |
| C | 0.328645  | 2.833357  | -0.377434 |
| C | 2.451761  | 0.000042  | -0.000017 |
| C | 1.838327  | 1.259220  | -0.143646 |
| C | -1.991743 | 2.900072  | -1.314235 |
| C | -0.959787 | -3.500060 | 0.581806  |
| C | 3.945753  | 0.000085  | -0.000026 |
| C | 2.528872  | -2.509131 | 0.107478  |
| H | 3.593684  | -2.637580 | -0.014521 |
| C | -3.208928 | 3.546810  | -1.489871 |
| H | -4.001561 | 3.052554  | -2.040650 |
| C | 1.581871  | -3.494194 | 0.244141  |
| H | 1.745641  | -4.561217 | 0.286133  |
| C | -1.991569 | -2.900269 | 1.314253  |
| C | 4.658029  | 0.379099  | -1.142061 |
| C | -3.413209 | 4.813892  | -0.953611 |
| C | 4.658071  | -0.378887 | 1.141998  |
| C | 0.073494  | -0.535580 | -2.995129 |
| H | 0.777503  | -1.286235 | -2.619353 |
| H | 0.543993  | 0.447393  | -2.944310 |
| C | -1.177833 | -4.780710 | 0.049428  |
| C | 1.581679  | 3.494230  | -0.244154 |
| H | 1.745387  | 4.561263  | -0.286138 |
| C | -1.178116 | 4.780575  | -0.049431 |
| C | -2.390624 | 5.430186  | -0.235144 |
| H | -2.543102 | 6.416927  | 0.190628  |
| C | 2.528731  | 2.509218  | -0.107490 |
| H | 3.593535  | 2.637725  | 0.014521  |
| C | 0.073682  | 0.536003  | 2.995031  |
| H | 0.777328  | 1.287084  | 2.619410  |
| H | 0.544626  | -0.446742 | 2.943948  |
| C | -2.390275 | -5.430426 | 0.235198  |
| H | -2.542683 | -6.417185 | -0.190558 |
| C | -2.189879 | 1.214455  | 2.760409  |
| H | -2.963716 | 0.478209  | 2.993270  |
| H | -2.601034 | 1.925550  | 2.043919  |
| C | -3.412879 | -4.814222 | 0.953714  |
| C | -3.208686 | -3.547118 | 1.489958  |
| H | -4.001327 | -3.052946 | 2.040802  |
| C | 6.049018  | 0.371506  | -1.144516 |
| H | 6.586930  | 0.657149  | -2.042779 |
| C | -1.604422 | 1.857309  | 4.010036  |



|   |           |           |           |
|---|-----------|-----------|-----------|
| H | -2.348609 | 1.960560  | 4.802334  |
| H | -1.211394 | 2.852719  | 3.781703  |
| C | -1.604387 | -1.857461 | -4.009872 |
| H | -2.348472 | -1.961069 | -4.802220 |
| H | -1.211271 | -2.852745 | -3.781145 |
| C | 6.049060  | -0.371208 | 1.144430  |
| H | 6.587003  | -0.656819 | 2.042685  |
| C | 6.748598  | 0.000171  | -0.000048 |
| C | -0.462659 | 0.904942  | 4.368123  |
| H | 0.301023  | 1.361296  | 5.001507  |
| H | -0.846900 | 0.017573  | 4.881102  |
| C | -2.190030 | -1.214226 | -2.760560 |
| H | -2.963624 | -0.477846 | -2.993837 |
| H | -2.601566 | -1.925032 | -2.044003 |
| C | -3.157641 | -0.000064 | 0.000106  |
| C | -0.462709 | -0.905057 | -4.368145 |
| H | 0.301093  | -1.361504 | -5.001316 |
| H | -0.847027 | -0.017914 | -4.881459 |
| H | 4.113678  | -0.672067 | 2.033436  |
| H | 7.833740  | 0.000206  | -0.000057 |
| H | 4.113603  | 0.672241  | -2.033491 |
| H | -4.364258 | -5.317659 | 1.090587  |
| H | -0.395222 | -5.257984 | -0.531226 |
| H | -1.836128 | -1.926413 | 1.765439  |
| H | -4.364644 | 5.317239  | -1.090426 |
| H | -1.836226 | 1.926229  | -1.765424 |
| H | -0.395524 | 5.257912  | 0.531196  |

77

| LMg(THF)2NC | B3PW91/6-311+G(2df,p) |           |           |
|-------------|-----------------------|-----------|-----------|
| Mg          | 0.980277              | -0.000292 | 0.000241  |
| O           | 1.083619              | -0.464820 | 2.147462  |
| O           | 1.084924              | 0.464656  | -2.146801 |
| N           | -0.454683             | 1.511620  | 0.281080  |
| N           | -0.455313             | -1.511495 | -0.281271 |
| N           | 3.007945              | -0.001054 | 0.000714  |
| C           | -1.819274             | 1.261814  | 0.127121  |
| C           | -0.311671             | 2.848427  | 0.341398  |
| C           | 0.969843              | -3.533294 | -0.531893 |
| C           | -0.312934             | -2.848365 | -0.341655 |
| C           | -2.429228             | 0.000524  | -0.000307 |
| C           | -1.819826             | -1.261043 | -0.127610 |
| C           | 2.015185              | -2.960861 | -1.265023 |
| C           | 0.971414              | 3.532730  | 0.531808  |
| C           | -3.927742             | 0.000875  | -0.000470 |
| C           | -2.512246             | 2.509808  | 0.092610  |
| H           | -3.576469             | 2.636227  | -0.016203 |
| C           | 3.218929              | -3.631758 | -1.431670 |
| H           | 4.020080              | -3.158832 | -1.985670 |

|   |           |           |           |
|---|-----------|-----------|-----------|
| C | -1.570695 | 3.498355  | 0.215019  |
| H | -1.741048 | 4.562528  | 0.252250  |
| C | 2.016356  | 2.959826  | 1.265145  |
| C | -4.640166 | -0.317967 | -1.158415 |
| C | 3.399864  | -4.895212 | -0.882610 |
| C | -4.640255 | 0.320062  | 1.157326  |
| C | -0.053014 | 0.422122  | -3.040184 |
| H | -0.783864 | 1.167383  | -2.712632 |
| H | -0.499153 | -0.568353 | -2.962527 |
| C | 1.167791  | 4.811203  | -0.013246 |
| C | -1.572300 | -3.497698 | -0.215594 |
| H | -1.743154 | -4.561786 | -0.252941 |
| C | 1.165473  | -4.811920 | 0.013070  |
| C | 2.365638  | -5.484045 | -0.160474 |
| H | 2.498722  | -6.466952 | 0.276029  |
| C | -2.513401 | -2.508710 | -0.093326 |
| H | -3.577709 | -2.634626 | 0.015235  |
| C | -0.054627 | -0.421008 | 3.040404  |
| H | -0.786210 | -1.165384 | 2.712484  |
| H | -0.499583 | 0.569991  | 2.962651  |
| C | 2.368283  | 5.482717  | 0.160403  |
| H | 2.501939  | 6.465514  | -0.276173 |
| C | 2.187042  | -1.180462 | 2.777691  |
| H | 2.993438  | -0.465967 | 2.947698  |
| H | 2.544711  | -1.939195 | 2.084792  |
| C | 3.402106  | 4.893410  | 0.882730  |
| C | 3.220433  | 3.630103  | 1.431888  |
| H | 4.021255  | 3.156803  | 1.986043  |
| C | -6.030073 | -0.310575 | -1.161037 |
| H | -6.566577 | -0.550526 | -2.071306 |
| C | 1.619671  | -1.744462 | 4.076107  |
| H | 2.380801  | -1.821648 | 4.852934  |
| H | 1.202325  | -2.740925 | 3.912284  |
| C | 1.623085  | 1.743750  | -4.075249 |
| H | 2.384676  | 1.820065  | -4.851709 |
| H | 1.206650  | 2.740654  | -3.911789 |
| C | -6.030167 | 0.313336  | 1.159657  |
| H | -6.566746 | 0.553546  | 2.069814  |
| C | -6.729535 | 0.001548  | -0.000763 |
| C | 0.504063  | -0.750326 | 4.417076  |
| H | -0.254605 | -1.163421 | 5.082659  |
| H | 0.917067  | 0.146219  | 4.886331  |
| C | 2.189266  | 1.179392  | -2.776458 |
| H | 2.995194  | 0.464246  | -2.945927 |
| H | 2.547133  | 1.937912  | -2.083425 |
| C | 4.176038  | -0.001378 | 0.001030  |
| C | 0.506646  | 0.750687  | -4.416634 |
| H | -0.251286 | 1.164465  | -5.082632 |
| H | 0.918967  | -0.146338 | -4.885570 |

|   |           |           |           |
|---|-----------|-----------|-----------|
| H | -4.099054 | 0.569618  | 2.061771  |
| H | -7.812871 | 0.001809  | -0.000877 |
| H | -4.098896 | -0.567781 | -2.062748 |
| H | 4.343159  | 5.414104  | 1.012220  |
| H | 0.377405  | 5.270202  | -0.594330 |
| H | 1.885864  | 1.987454  | 1.720510  |
| H | 4.340662  | -5.416387 | -1.012022 |
| H | 1.885258  | -1.988365 | -1.720281 |
| H | 0.374764  | -5.270562 | 0.593997  |

77

| LMg(THF)2CN | B3PW91/6-311+G(2df,p) |           |           |
|-------------|-----------------------|-----------|-----------|
| Mg          | -0.972403             | 0.000035  | 0.000030  |
| O           | -1.071108             | 0.479540  | 2.154885  |
| O           | -1.071268             | -0.479521 | -2.154801 |
| N           | 0.465564              | -1.508412 | 0.289055  |
| N           | 0.465636              | 1.508397  | -0.289079 |
| N           | -4.289226             | 0.000167  | 0.000129  |
| C           | 1.829973              | -1.260784 | 0.130856  |
| C           | 0.320865              | -2.844814 | 0.351875  |
| C           | -0.963546             | 3.525332  | -0.546261 |
| C           | 0.321010              | 2.844807  | -0.351908 |
| C           | 2.440462              | -0.000060 | -0.000037 |
| C           | 1.830036              | 1.260695  | -0.130915 |
| C           | -2.001606             | 2.951583  | -1.288839 |
| C           | -0.963726             | -3.525267 | 0.546246  |
| C           | 3.938736              | -0.000101 | -0.000057 |
| C           | 2.521042              | -2.509822 | 0.096285  |
| H           | 3.584771              | -2.637943 | -0.015462 |
| C           | -3.209264             | 3.615254  | -1.456093 |
| H           | -4.005186             | 3.140163  | -2.015601 |
| C           | 1.578309              | -3.496962 | 0.222726  |
| H           | 1.746882              | -4.561417 | 0.260801  |
| C           | -2.001739             | -2.951467 | 1.288849  |
| C           | 4.651295              | 0.324176  | -1.156495 |
| C           | -3.400528             | 4.873779  | -0.899235 |
| C           | 4.651308              | -0.324416 | 1.156364  |
| C           | 0.063510              | -0.428371 | -3.051322 |
| H           | 0.801411              | -1.168220 | -2.726871 |
| H           | 0.502065              | 0.565493  | -2.974274 |
| C           | -1.169603             | -4.799053 | -0.005707 |
| C           | 1.578493              | 3.496886  | -0.222797 |
| H           | 1.747124              | 4.561332  | -0.260887 |
| C           | -1.169337             | 4.799138  | 0.005677  |
| C           | -2.373084             | 5.464729  | -0.169252 |
| H           | -2.514422             | 6.443984  | 0.272840  |
| C           | 2.521175              | 2.509696  | -0.096372 |
| H           | 3.584914              | 2.637759  | 0.015346  |
| C           | 0.063712              | 0.428254  | 3.051346  |

|   |           |           |           |
|---|-----------|-----------|-----------|
| H | 0.801687  | 1.168008  | 2.726847  |
| H | 0.502140  | -0.565665 | 2.974283  |
| C | -2.373387 | -5.464574 | 0.169233  |
| H | -2.514792 | -6.443814 | -0.272869 |
| C | -2.164691 | 1.220076  | 2.774256  |
| H | -2.989755 | 0.524556  | 2.932462  |
| H | -2.496287 | 1.989919  | 2.079887  |
| C | -3.400784 | -4.873572 | 0.899240  |
| C | -3.209435 | -3.615066 | 1.456114  |
| H | -4.005319 | -3.139934 | 2.015641  |
| C | 6.041176  | 0.316977  | -1.159033 |
| H | 6.577719  | 0.561013  | -2.068189 |
| C | -1.599659 | 1.770063  | 4.080343  |
| H | -2.365747 | 1.852972  | 4.851621  |
| H | -1.168718 | 2.762037  | 3.925019  |
| C | -1.600062 | -1.769993 | -4.080229 |
| H | -2.366211 | -1.852813 | -4.851458 |
| H | -1.169212 | -2.762013 | -3.924951 |
| C | 6.041189  | -0.317295 | 1.158865  |
| H | 6.577742  | -0.561360 | 2.068007  |
| C | 6.740591  | -0.000178 | -0.000093 |
| C | -0.498793 | 0.760818  | 4.425427  |
| H | 0.260617  | 1.162909  | 5.096900  |
| H | -0.925701 | -0.131917 | 4.889428  |
| C | -2.164954 | -1.219971 | -2.774095 |
| H | -2.989976 | -0.524386 | -2.932230 |
| H | -2.496557 | -1.989796 | -2.079708 |
| C | -3.130141 | 0.000125  | 0.000093  |
| C | -0.499116 | -0.760855 | -4.425372 |
| H | 0.260208  | -1.163015 | -5.096900 |
| H | -0.925962 | 0.131932  | -4.889331 |
| H | 4.110088  | -0.578061 | 2.059642  |
| H | 7.823927  | -0.000208 | -0.000107 |
| H | 4.110066  | 0.577850  | -2.059760 |
| H | -4.344640 | -5.389162 | 1.028591  |
| H | -0.384326 | -5.258734 | -0.593207 |
| H | -1.861393 | -1.983915 | 1.751997  |
| H | -4.344354 | 5.389424  | -1.028577 |
| H | -1.861325 | 1.984015  | -1.751972 |
| H | -0.384022 | 5.258780  | 0.593157  |

4

| HMgNC | B3PW91/6-311+G** |           |          |
|-------|------------------|-----------|----------|
| Mg    | -0.002794        | -1.176654 | 0.000000 |
| C     | 0.006334         | 1.940449  | 0.000000 |
| H     | -0.004476        | -2.861497 | 0.000000 |
| N     | 0.000000         | 0.762665  | 0.000000 |

4

|          |           |                  |           |
|----------|-----------|------------------|-----------|
| HMgNC TS |           | B3PW91/6-311+G** |           |
| Mg       | -0.998789 | -0.028097        | -0.004931 |
| C        | 1.385718  | -0.535272        | 0.001228  |
| H        | -2.668126 | -0.251787        | 0.032520  |
| N        | 0.905613  | 0.542941         | 0.002755  |

4

|              |           |                  |           |
|--------------|-----------|------------------|-----------|
| HMgNC SideOn |           | B3PW91/6-311+G** |           |
| Mg           | -0.973280 | -0.081348        | -0.000005 |
| C            | 1.244679  | -0.563284        | 0.000005  |
| H            | -2.620408 | 0.276554         | 0.000037  |
| N            | 0.975957  | 0.582760         | 0.000000  |

4

|          |           |                  |          |
|----------|-----------|------------------|----------|
| HMgCN TS |           | B3PW91/6-311+G** |          |
| Mg       | -0.587108 | -0.907935        | 0.000000 |
| C        | 0.000000  | 1.057099         | 0.000000 |
| H        | -1.126858 | -2.504917        | 0.000000 |
| N        | 1.167451  | 1.008221         | 0.000000 |

4

|       |          |                  |           |
|-------|----------|------------------|-----------|
| HMgCN |          | B3PW91/6-311+G** |           |
| Mg    | 0.000000 | 0.000000         | -1.280031 |
| C     | 0.000000 | 0.000000         | 0.784771  |
| H     | 0.000000 | 0.000000         | -2.966563 |
| N     | 0.000000 | 0.000000         | 1.945472  |

77

|                |           |                        |           |
|----------------|-----------|------------------------|-----------|
| TS LMg(THF)2CN |           | B3PW91/6-311+G** GD3BJ |           |
| Mg             | -0.712374 | 0.289031               | 0.481321  |
| O              | 0.676152  | 0.485784               | 2.090572  |
| O              | -2.166215 | -0.070338              | -0.967174 |
| N              | 0.159531  | -1.576997              | 0.070438  |
| N              | 0.719483  | 1.299937               | -0.668886 |
| C              | 1.498455  | -1.654490              | -0.288454 |
| C              | -0.327973 | -2.830984              | 0.034491  |
| C              | -0.340005 | 3.511307               | -0.870720 |
| C              | 0.823932  | 2.631828               | -0.819790 |
| C              | 2.356046  | -0.565155              | -0.537075 |
| C              | 2.014578  | 0.788433               | -0.676372 |
| C              | -1.543320 | 3.078614               | -1.437105 |
| C              | -1.728618 | -3.156288              | 0.300243  |
| C              | 3.792068  | -0.905518              | -0.709094 |
| C              | 1.837023  | -3.021764              | -0.522219 |
| H              | 2.807412  | -3.385345              | -0.824321 |
| C              | -2.648739 | 3.915341               | -1.469207 |
| H              | -3.576045 | 3.568560               | -1.913085 |
| C              | 0.685770  | -3.756147              | -0.338808 |
| H              | 0.567326  | -4.826218              | -0.427118 |

|   |           |           |           |
|---|-----------|-----------|-----------|
| C | -2.496532 | -2.437764 | 1.221955  |
| C | 4.454978  | -0.639108 | -1.909625 |
| C | -2.572395 | 5.197830  | -0.935607 |
| C | 4.496334  | -1.509128 | 0.335873  |
| C | -1.828253 | -0.684246 | -2.233623 |
| H | -1.402528 | -1.667483 | -2.026162 |
| H | -1.067037 | -0.065625 | -2.713932 |
| C | -2.340229 | -4.206958 | -0.399915 |
| C | 2.188692  | 3.025348  | -0.915959 |
| H | 2.548679  | 4.032607  | -1.066530 |
| C | -0.268589 | 4.807734  | -0.348353 |
| C | -1.377442 | 5.641395  | -0.376579 |
| H | -1.313725 | 6.637299  | 0.048848  |
| C | 2.935063  | 1.871107  | -0.829426 |
| H | 4.010007  | 1.782001  | -0.868069 |
| C | 0.525314  | -0.324103 | 3.270229  |
| H | 1.387968  | -0.996447 | 3.338969  |
| H | -0.383534 | -0.917441 | 3.161171  |
| C | -3.676859 | -4.518615 | -0.190407 |
| H | -4.133736 | -5.329270 | -0.748433 |
| C | 1.111230  | 1.820721  | 2.449187  |
| H | 0.287667  | 2.506612  | 2.230857  |
| H | 1.972548  | 2.066104  | 1.826248  |
| C | -4.432600 | -3.786883 | 0.722816  |
| C | -3.834406 | -2.746302 | 1.427582  |
| H | -4.406751 | -2.168805 | 2.145910  |
| C | 5.795962  | -0.971315 | -2.061967 |
| H | 6.296697  | -0.771112 | -3.003286 |
| C | 1.415796  | 1.760829  | 3.938500  |
| H | 1.243913  | 2.721564  | 4.426844  |
| H | 2.457102  | 1.470243  | 4.110166  |
| C | -4.160602 | -0.901660 | -1.863477 |
| H | -5.176349 | -0.639328 | -2.165003 |
| H | -4.166774 | -1.917852 | -1.459754 |
| C | 5.840937  | -1.827598 | 0.187978  |
| H | 6.380152  | -2.285146 | 1.010663  |
| C | 6.493389  | -1.561728 | -1.012269 |
| C | 0.466693  | 0.663120  | 4.420757  |
| H | 0.764861  | 0.216380  | 5.371290  |
| H | -0.549673 | 1.054142  | 4.514074  |
| C | -3.600031 | 0.058471  | -0.834297 |
| H | -3.870123 | 1.099543  | -1.037586 |
| H | -3.856366 | -0.175153 | 0.196616  |
| C | -3.140459 | -0.777750 | -2.995695 |
| H | -3.150592 | -1.625021 | -3.683483 |
| H | -3.319725 | 0.134381  | -3.573463 |
| H | 3.979642  | -1.717630 | 1.266076  |

|   |           |           |           |
|---|-----------|-----------|-----------|
| H | 7.541292  | -1.816267 | -1.130147 |
| H | 3.905427  | -0.182892 | -2.725438 |
| H | -5.477917 | -4.027639 | 0.884042  |
| H | -1.763346 | -4.764072 | -1.130247 |
| H | -2.061528 | -1.624692 | 1.789838  |
| H | -3.440072 | 5.848442  | -0.952827 |
| H | -1.597710 | 2.081323  | -1.852837 |
| H | 0.654689  | 5.147895  | 0.108286  |
| C | -2.239240 | 0.905640  | 1.964918  |
| N | -2.118822 | 2.045507  | 1.729574  |

77

TS LMg(THF)2CN

B3PW91/6-311+G\*\*

|    |           |           |           |
|----|-----------|-----------|-----------|
| Mg | -0.750286 | 0.323960  | 0.500028  |
| O  | 0.516994  | 0.259636  | 2.287335  |
| O  | -2.158259 | 0.277146  | -1.122525 |
| N  | -0.060970 | -1.611159 | -0.025656 |
| N  | 0.830042  | 1.322609  | -0.484539 |
| C  | 1.277695  | -1.768140 | -0.371996 |
| C  | -0.622938 | -2.833033 | -0.114367 |
| C  | 0.114816  | 3.706840  | -0.609561 |
| C  | 1.114676  | 2.636117  | -0.578717 |
| C  | 2.233833  | -0.745924 | -0.537642 |
| C  | 2.048258  | 0.648440  | -0.557286 |
| C  | -1.154847 | 3.514551  | -1.165189 |
| C  | -2.034434 | -3.138700 | 0.148387  |
| C  | 3.634947  | -1.216286 | -0.765092 |
| C  | 1.529593  | -3.143690 | -0.656320 |
| H  | 2.478318  | -3.561694 | -0.956612 |
| C  | -2.067647 | 4.558964  | -1.228818 |
| H  | -3.047205 | 4.393076  | -1.665635 |
| C  | 0.336712  | -3.806284 | -0.509249 |
| H  | 0.155519  | -4.864102 | -0.631728 |
| C  | -2.806992 | -2.429589 | 1.075901  |
| C  | 4.258281  | -1.037571 | -2.003446 |
| C  | -1.733619 | 5.816145  | -0.735439 |
| C  | 4.341467  | -1.852100 | 0.259775  |
| C  | -1.786121 | -0.207673 | -2.434570 |
| H  | -1.604300 | -1.284259 | -2.366540 |
| H  | -0.857934 | 0.290319  | -2.721569 |
| C  | -2.642522 | -4.203769 | -0.537732 |
| C  | 2.517278  | 2.846343  | -0.690900 |
| H  | 3.007675  | 3.801307  | -0.811596 |
| C  | 0.440530  | 4.979578  | -0.117929 |
| C  | -0.474804 | 6.021297  | -0.177037 |
| H  | -0.207901 | 6.995433  | 0.220100  |
| C  | 3.101745  | 1.603936  | -0.679631 |

|   |           |           |           |
|---|-----------|-----------|-----------|
| H | 4.153785  | 1.376200  | -0.759008 |
| C | 0.253551  | -0.665558 | 3.365144  |
| H | 0.962488  | -1.496012 | 3.278852  |
| H | -0.762944 | -1.046463 | 3.251354  |
| C | -3.968543 | -4.543372 | -0.304633 |
| H | -4.415650 | -5.367837 | -0.851143 |
| C | 1.075406  | 1.489230  | 2.812121  |
| H | 0.293436  | 2.255174  | 2.786060  |
| H | 1.899318  | 1.782597  | 2.159389  |
| C | -4.723615 | -3.827210 | 0.621268  |
| C | -4.135299 | -2.768651 | 1.307004  |
| H | -4.707321 | -2.202273 | 2.035122  |
| C | 5.557830  | -1.487816 | -2.212878 |
| H | 6.024355  | -1.351774 | -3.183312 |
| C | 1.498701  | 1.160858  | 4.235058  |
| H | 1.507022  | 2.046202  | 4.874153  |
| H | 2.500626  | 0.719630  | 4.248712  |
| C | -4.147336 | -0.049760 | -2.357631 |
| H | -5.050178 | 0.472993  | -2.680133 |
| H | -4.392727 | -1.107997 | -2.229629 |
| C | 5.646321  | -2.288811 | 0.054726  |
| H | 6.185787  | -2.771178 | 0.863562  |
| C | 6.257162  | -2.110531 | -1.183096 |
| C | 0.448410  | 0.128913  | 4.648520  |
| H | 0.763706  | -0.503441 | 5.481326  |
| H | -0.484398 | 0.627577  | 4.926095  |
| C | -3.588087 | 0.524438  | -1.064348 |
| H | -3.738456 | 1.604917  | -0.984638 |
| H | -3.974953 | 0.053476  | -0.161431 |
| C | -2.974379 | 0.111972  | -3.326441 |
| H | -3.030562 | -0.554357 | -4.189726 |
| H | -2.915698 | 1.141372  | -3.694130 |
| H | 3.862485  | -1.996712 | 1.222385  |
| H | 7.272767  | -2.456832 | -1.345047 |
| H | 3.713373  | -0.551643 | -2.806013 |
| H | -5.759164 | -4.093428 | 0.806878  |
| H | -2.071389 | -4.758390 | -1.274675 |
| H | -2.383607 | -1.602603 | 1.633195  |
| H | -2.449932 | 6.629840  | -0.781936 |
| H | -1.416066 | 2.538574  | -1.554833 |
| H | 1.413175  | 5.145427  | 0.333274  |
| C | -2.359182 | 0.907286  | 1.921638  |
| N | -2.139213 | 2.050331  | 1.800553  |



## 5) References

- [1] E. R. King, T. A. Betley, *Inorg. Chem.* **2009**, *48*, 2361-2363.
- [2] M. Westerhausen, W. Schwarz, *Z. Anorg. Allg. Chem.* **1992**, *609*, 39-44.
- [3] M. T. Reetz, I. Chatziiosifidis, *Synthesis* **1982**, *4*, 330.
- [4] Rigaku Oxford Diffraction, **2018**, CrysAlisPro Software system, version 1.171.39.46, Rigaku Corporation, Oxford, UK.
- [5] O. V. Dolomanov, L. J. Bourhis, R.J. Gildea, J. A. K. Howard and H. Puschmann, *J. Appl. Cryst.*, **2009**, *42*, 339–341.
- [6] G. M. Sheldrick, *Acta Cryst. A*, **2015**, *71*, 3–8.
- [7] G. M. Sheldrick, *Acta Cryst.* **2008**, *A64*, 112-122.
- [8] B. Rees, L. Jenner, M. Yusupov, *Acta Cryst.* **2005**, *D61*, 1299-1301.
- [9] R. Neufeld, D. Stalke, *Chem. Sci.* **2015**, *6*, 3354-3364.
- [10] S. Bachmann, R. Neufeld, M. Dzemski, D. Stalke, *Chem. Eur. J.* **2016**, *22*, 8462-8465.
- [11] D. L. Pavia, G. M. Lampman, G. S. Kriz, J. R. Vyvyan, in *Introduction to Spectroscopy*. Stamford, CT: Cengage Learning, **2015**, Fifth Edition.
- [12] J. P. Merrick, D. Moran, L. Radom, *J. Phys. Chem. A* **2007**, *111*, 11683-11700.
- [13] M. J. Frisch, G. W. Trucks, H. B. Schlegel, G. E. Scuseria, M. A. Robb, J. R. Cheeseman, G. Scalmani, V. Barone, G. A. Petersson, H. Nakatsuji, X. Li, M. Caricato, A. V. Marenich, J. Bloino, B. G. Janesko, R. Gomperts, B. Mennucci, H. P. Hratchian, J. V. Ortiz, A. F. Izmaylov, J. L. Sonnenberg, D. Williams-Young, F. Ding, F. Lipparini, F. Egidi, J. Goings, B. Peng, A. Petrone, T. Henderson, D. Ranasinghe, V. G. Zakrzewski, J. Gao, N. Rega, G. Zheng, W. Liang, M. Hada, M. Ehara, K. Toyota, R. Fukuda, J. Hasegawa, M. Ishida, T. Nakajima, Y. Honda, O. Kitao, H. Nakai, T. Vreven, K. Throssell, J. A. Montgomery, J. E. Peralta, F. Ogliaro, M. J. Bearpark, J. J. Heyd, E. N. Brothers, K. N. Kudin, V. N. Staroverov, T. A. Keith, R. Kobayashi, J. Normand, K. Raghavachari, A. P. Rendell, J. C. Burant, S. S. Iyengar, J. Tomasi, M. Cossi, J. M. Millam, M. Klene, C. Adamo, R. Cammi, J. W. Ochterski, R. L. Martin, K. Morokuma, O. Farkas, J. B. Foresman, D. J. Fox, Gaussian 16 Rev. A.03, Wallingford CT, **2016**.
- [14] A. D. Becke, *Phys. Rev. A* **1988**, *38*, 3098–3100.

- [15] J. P. Perdew, *Electronic Structure of Solids*, Akademie Verlag, Berlin, **1991**.
- [16] W. J. Hehre, L. Radom, P. v. R. Schleyer, J. A. Pople, *Ab Initio Molecular Orbital Theory* by W. J. Hehre, L. Radom, P. v. R. Schleyer, and J. A. Pople, John Wiley, New York, John Wiley, New York, **1986**.
- [17] T. Clark, J. Chandrasekhar, G. W. Spitznagel, P. v. R. Schleyer, *J. Comp. Chem.* **1983**, *4*, 294–301.
- [18] S. Grimme, S. Ehrlich, L. Goerigk, *J. Comp. Chem.* **2011**, *32*, 1456–1465.
- [19] A. E. Reed, R. B. Weinstock, F. Weinhold, *J. Chem. Phys.* **1985**, *83*, 735–746.
- [20] N. van Eikema Hommes, *Molecule*, Erlangen, **2016**.
- [21] R. F. W. Bader, *Chem. Rev.* **1991**, *91*, 893–928.
- [22] T. A. Keith, AIMAll (Version 17.01.25), TK Gristmill Software, Overland Park KS USA, **2017**.
